# Supplementary material for: Influence of infrastructure on water quality and greenhouse gas dynamics in urban streams
Source: Copernicus journal article supplement (doi:10.5194/bg-14-2831-2017), 2017-06-13
Supplement: Supplementary file 1 [file bg-14-2831-2017-supplement.zip]

Archive with 2 entries (2 files):
- Supplementary Information.xlsx
- bg-14-2831-2017-supplement-title-page.pdf
