# Supplementary material for: Influence of infrastructure on water quality and greenhouse gas dynamics in urban streams
Source: Copernicus journal article supplement (doi:10.5194/bg-14-2831-2017), 2017-06-13
Supplement: Supplementary file 1 [file bg-14-2831-2017-supplement.zip › bg-14-2831-2017-supplement-title-page.pdf]

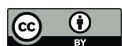

## *Supplement of*

# **Influence of infrastructure on water quality and greenhouse gas dynamics in urban streams**

**Rose M. Smith et al.**

*Correspondence to:* Rose M. Smith ([smithrose24@gmail.com](mailto:smithrose24@gmail.com))

- [bg-14-2831-2017-supplement-title-page.pdf](#)
- [Supplementary Information.xlsx](#)

The copyright of individual parts of the supplement might differ from the CC BY 3.0 License.
