# Supplementary material for: Influence of infrastructure on water quality and greenhouse gas dynamics in urban streams
Source: Copernicus journal article supplement (doi:10.5194/bg-14-2831-2017), 2017-06-13
Supplement: Supplementary file 1 [file Supplementary Information.xlsx]

## Sheet: metadata
Metadata for Dissolved gas and solutes measured biweekly in Baltimore County streams
Contact:	Rose Smith	rose.smith@utah.edu
Gas Concentraitons Sheet
Sheet Description	This sheet summarizes all dissolved gas samples taken bi-weekly for one year at eight headwater stream sites
Header descrptions:
Date	Sampling date
Site	Four letter abbreviation used to denote each of eight headwater sampling sites. Six of these were also gaging stations with continuous pressure head and temperature measurements
Typology	Infrastructure typology based on dominant form of infrastructure within the waterhsed
Field Sample ID	ID for which of the five samples were taken at each site on each date along a 60ft transect
Sample Location	Location alnog the 60ft transect at each site where a given sample was taken
stream temp_C	temperature measured in the stream
Temp at equilibration_C	temperature measured in tub of streamwater during headspace equlibration procedure in the field
Water volume in syringe_mL	Volume of water pulled into syringe for a dissolved gas sample in mililiters
Gas volume in syringe_mL	volume of helium gas pulled into syringe during headspace equlibration procedure in mlilliters
Bp_mmhg	barometric pressure measured in the field (milimetesr of mercury)
DO_mgL	dissolved oxygen measred in the stream (mligrams O2 per liter)
CO2rawPPM	raw CO2 concentration measured on the gas chromatograph (parts per million)
CHrawPPM	raw CH4 concentration measured on the gas chromatograph (parts per million)
N2OrawPPM	raw N2O concentration measured on the gas chromatograph (parts per million)
CO2umol/L	Concentration of CO2 dissolved in stream water (micromoles CO2 per liter)
CH4umol/L	Concentration of CH4 dissolved in stream water (micromoles CH4 per liter)
N2Oumol/L	Concentration of N2O dissolved in stream water (micromoles N per liter)
N2Osat	Saturation ratio of N2O (measured N2O concentration dividied by N2O at equlibrium with the atmosphere)
CO2sat	Saturation ratio of CO2 (measured CO2 concentration dividied by CO2 at equlibrium with the atmosphere)
CH4sat	Saturation ratio of CH4 (measured CH4 concentration dividied by CH4 at equlibrium with the atmosphere)
O2eq_mgL	Oxygen concentration at equilibrium with the atmosphere for a given sampling site and date (miligrams per liter)
O2sat	Oxygen saturation ratio (measured oxygen concentration divided by O2eq_mgl)
Stream chemistry sheet
Sheet description:	Stream water chemistry measured at the same headwater sites as GHG concentrations, bi-weekly for two years. One grab sample was taken at each site & date unless otherwise denoted as a field duplicate, in which two samples were taken.
Header Descriptions:
Site	Four letter abbreviation used to denote each of eight headwater sampling sites. Six of these were also gaging stations with continuous pressure head and temperature measurements
Typology	Infrastructure typology based on dominant form of infrastructure within the waterhsed
Latitude	Locational information for sampling site, decimal degrees
Longitude	Locational information for sampling site, decimal degrees
Field Duplicate	Field duplicates were taken at one site on each date to evaluate field-replication. Y or N in this field denotes whether or not this site was duplicated on a given date
datetime	Date and time of sample collection
DO	Dissolved oxygen (miligrams per liter). Missing data denotes periods of sensor failure
Temp	stream temperature
pH	pH measured by handheld probe. Missing data denotes sensor failure
DIC	dissolved inorganic carbon, miligrams per liter
DOC	dissolved organic carbon, miligrams per liter
TDN	total dissolved nitrogen, miligrams per liter
HIX	humification idex
BIX	autochthonous producitivty index
FI	fluorescence index
NO3	nitrate, miligrams per liter
Seasonal Synoptic Sheet
Sheet description	Data compiled for fall and spring synoptic surveys of Dead Run and Red Run. Surveys were completed in one day for each watershed, and within one week for each season.
Header descriptions:
Date	Sampling date
watershed	Dead run vs. Red Run
Site ID	ID of site within larger watershed
Type	Main stem vs. tributary sampling site
Latitude	locational information in decimal degrees
Longitude	locational information in decimal degrees
Drainage area_km2	area of watershed draining to a single sampling point.
Distance to WS outlet_m	Distance between the farthest downstream sampling point and each sampling location along flowlines
DO_mgL	dissolved oxygen. Missing data denoted by (NA) signify sensor failure.
O2eq.umol	Oxygen concentration at equilibrium with the atmosphere (micromoles per liter)
Q_m3s	discharge measured by hand at each sampling location in cubic meters per second
Stream Temperature	stream temperature measured by handheld probe
pH	pH measured by handheld probe. Missing data (NA) signifies sensor failure.
CO2uM	concentration of CO2 in the stream based on one syringe sample (micromoles per liter)
CH4uM	concentration of CH4 in the stream based on one syringe sample (micromoles per liter)
N2OuM	concentration of N2O in the stream based on one syringe sample (micromoles per liter)
N2Osat	saturation ratio of N2O at each sampling point based on one syringe sample
CO2sat	saturation ratio of CO2 at each sampling point based on one syringe sample
CH4sat	saturation ratio of CH4 at each sampling point based on one syringe sample
DIC.mgL	disolved inorganic carbon, miligrams per liter
DOC.mgL	dissolved organic carbon, miligrams per liter
TDN.mgL	total dissolved nitrogen, miligrams per liter

## Sheet: Gas Concentrations
Date	Site	Typology	Field Sample ID	Sample Location	stream temp_C	Temp at equilibration_C	Water volume in syringe_mL	Gas volume in syringe_mL	Bp_mmhg	DO_mgL	CO2rawPPM	CHrawPPM	N2OrawPPM	CO2umol/L	CH4umol/L	N2Oumol/L	N2Osat	CO2sat	CH4sat	O2eq_mgL	O2sat
2013-07-09	DRAL	Stream Burial	AL1	0	19.5	12	115	22	753.3	8.29	2696.62	2.323	1.077	156.206	0.024	0.048	5.577	11.686	9.082	9.09682	0.911307
2013-07-09	DRAL	Stream Burial	AL2	15	19	12	115	25	753.2	8.29	2833.3	1.817	1.012	167.401	0.021	0.047	5.284	12.332	7.815	9.18754	0.902309
2013-07-09	DRAL	Stream Burial	AL3	30	19	12	115	24	753.6	8.29	2425.68	1.85	0.806	142.44	0.021	0.037	4.173	10.488	7.688	9.19242	0.90183
2013-07-09	DRAL	Stream Burial	AL4	45	19	12	116	26	753.2	8.29	2728.78	1.658	1.023	162.046	0.02	0.047	5.377	11.938	7.318	9.18754	0.902309
2013-07-09	DRAL	Stream Burial	AL5	60	19	12	111	25	753.2	8.29	2712.36	2.076	0.87	161.203	0.025	0.04	4.576	11.876	9.202	9.18754	0.902309
2013-07-09	DRGG	In-line SWM	GG1	0	19	21	112	25	753.9	5.22	11174.4	70.598	3.84	529.409	0.809	0.141	16.006	38.965	301.651	9.19608	0.567633
2013-07-09	DRGG	In-line SWM	GG2	15	20	21	114	25	754	5.22	8407.99	93.833	3.113	396.919	1.059	0.114	13.36	30.127	403.502	9.0149	0.579041
2013-07-09	DRGG	In-line SWM	GG3	30	19.5	21	112	25	754	5.22	7351.26	57.617	2.595	348.317	0.66	0.096	11.003	26.034	248.878	9.10528	0.573294
2013-07-09	DRGG	In-line SWM	GG4	45	20	21	115	25	754	5.22	7246.42	45.527	2.583	341.468	0.51	0.094	11.057	25.918	194.302	9.0149	0.579041
2013-07-09	DRGG	In-line SWM	GG5	60	20	21	115	25	753.9	5.22	6468.52	25.992	2.231	304.779	0.291	0.082	9.551	23.137	110.942	9.01371	0.579118
2013-07-09	DRIS	Stream Burial	IS1	0	20.5	22	115	25	754.3	6.96	7540.2	15.364	2.593	347.467	0.172	0.093	11.031	26.77	66.088	8.92968	0.779423
2013-07-09	DRIS	Stream Burial	IS2	15	20.5	22	115	25	754.2	6.96	7279.97	10.366	2.586	335.44	0.116	0.092	10.999	25.847	44.594	8.9285	0.779526
2013-07-09	DRIS	Stream Burial	IS3	30	20.5	22	115	25	754.2	6.96	6074.85	7.271	2.202	279.912	0.081	0.079	9.365	21.568	31.279	8.9285	0.779526
2013-07-09	DRIS	Stream Burial	IS4	45	20	22	115	25	754.1	6.96	7210.87	5.953	2.422	332.222	0.066	0.087	10.132	25.213	25.339	9.0161	0.771952
2013-07-09	DRIS	Stream Burial	IS5	60	20.5	22	115	26	754.2	6.96	6545.17	5.581	2.137	304.121	0.065	0.077	9.187	23.434	24.843	8.9285	0.779526
2013-07-09	DRKV	In-line SWM	KV1	0	17.5	20	115	25	753.5	6.73	12605.3	23.562	6.387	607.569	0.265	0.239	25.714	42.683	95.451	9.47739	0.710111
2013-07-09	DRKV	In-line SWM	KV2	15	18	20	115	25	753.5	6.73	11435.5	22.395	6.008	551.188	0.251	0.225	24.609	39.339	91.753	9.38023	0.717467
2013-07-09	DRKV	In-line SWM	KV3	30	18	20	113	25	753.5	6.73	12792.3	22.504	6.483	618.778	0.257	0.244	26.678	44.163	93.607	9.38023	0.717467
2013-07-09	DRKV	In-line SWM	KV4	45	18	20	115	25	753.4	6.73	12215.4	20.325	6.171	588.713	0.228	0.231	25.278	42.022	83.28	9.37898	0.717562
2013-07-09	DRKV	In-line SWM	KV5	60	18	20	114	25	753.4	6.73	NA	NA	NA	NA	NA	NA	NA	NA	NA	9.37898	0.717562
2013-07-09	RRSD	Septic Systems	SD1	0	15	18	114	25	746.3	8.21	15807.1	3.632	7.31	794.359	0.041	0.286	28.4418	51.9834	14.1876	9.89614	0.829616
2013-07-09	RRSD	Septic Systems	SD2	15	15	18	115	25	746.2	8.21	17088.7	3.502	7.734	857.217	0.039	0.302	30.0276	56.1044	13.5803	9.89482	0.829727
2013-07-09	RRSD	Septic Systems	SD3	30	15.5	18	113	25	746.2	8.21	17562.9	2.959	7.848	884.016	0.034	0.308	31.1492	58.8102	11.7848	9.78904	0.838693
2013-07-09	RRSD	Septic Systems	SD4	45	15	18	113	25	746.2	8.21	17247.3	3.051	7.788	868.131	0.035	0.305	30.3696	56.8187	12.0088	9.89482	0.829727
2013-07-09	RRSD	Septic Systems	SD5	60	15	18	115	25	746.2	8.21	9164.03	2.725	4.349	459.693	0.031	0.17	16.8851	30.0867	10.5639	9.89482	0.829727
2013-07-10	RRRB	Floodplain preservation	RB1	0	22	23	114	25	747.7	7.17	3640.22	35.456	0.85	163.256	0.398	0.03	3.73318	13.2782	159.462	8.59659	0.834052
2013-07-10	RRRB	Floodplain preservation	RB2	15	22	23	105	25	747.7	7.17	3953.89	74.668	1.021	180.638	0.9	0.036	4.59293	14.692	360.917	8.59659	0.834052
2013-07-10	RRRB	Floodplain preservation	RB3	30	22.5	23	113	25	747.8	7.17	3771.39	55.586	1.061	169.483	0.628	0.037	4.75201	13.9905	254.537	8.51565	0.841979
2013-07-10	RRRB	Floodplain preservation	RB4	45	22	23	112	25	748	7.17	3220.55	39.738	0.845	145.043	0.453	0.03	3.72953	11.7921	181.442	8.60004	0.833717
2013-07-10	RRRB	Floodplain preservation	RB5	60	23	23	115	25	748.1	7.17	2573.71	35.577	0.677	115.255	0.396	0.024	3.0679	9.65265	162.046	8.43834	0.849693
2013-07-10	RRRM	Floodplain preservation	RM1	0	22.5	26.5	115	25	747.8	7.64	1682.74	43.763	0.343	69.982	0.483	0.011	1.41716	5.77685	195.792	8.51565	0.897172
2013-07-10	RRRM	Floodplain preservation	RM2	15	22.5	26.5	115	25	747.7	7.64	1802.22	43.958	0.347	74.943	0.485	0.011	1.43238	6.1872	196.69	8.51451	0.897292
2013-07-10	RRRM	Floodplain preservation	RM3	30	22.5	26.5	114	25	747.8	7.64	1832.78	52.448	0.343	76.378	0.584	0.011	1.41969	6.30481	236.458	8.51565	0.897172
2013-07-10	RRRM	Floodplain preservation	RM4	45	23	26.5	115	25	747.6	7.64	3200.4	140.827	0.371	133.071	1.555	0.012	1.55739	11.1522	636.744	8.4327	0.905997
2013-07-10	RRRM	Floodplain preservation	RM5	60	22.5	26.5	115	25	747.5	7.64	3383.02	232.515	0.335	140.65	2.567	0.011	1.385	11.615	1040.62	8.51223	0.897532
2013-07-10	RRSM	Septic Systems	SM1	0	17.5	19.5	115	25	746.2	8.53	3863.93	5.23	1.271	186.979	0.059	0.048	5.19214	13.2641	21.395	9.38557	0.908842
2013-07-10	RRSM	Septic Systems	SM2	15	17.5	19.5	105	25	746.1	8.53	5141.09	4.46	1.597	253.502	0.054	0.062	6.68412	17.9856	19.7492	9.38431	0.908964
2013-07-10	RRSM	Septic Systems	Sm3	30	17.5	19.5	114	25	746.1	8.53	4715.59	4.615	1.511	228.568	0.052	0.057	6.18684	16.2166	19.0249	9.38431	0.908964
2013-07-10	RRSM	Septic Systems	SM4	45	18.5	19.5	113	25	746.1	8.53	4480.66	5.937	1.473	217.569	0.068	0.056	6.25588	15.9302	25.2207	9.19366	0.927813
2013-07-10	RRSM	Septic Systems	SM5	60	17.5	19.5	114	25	746.3	8.53	NA	NA	NA	NA	NA	NA	NA	NA	NA	9.38683	0.90872
2013-07-24	DRAL	Stream Burial	AL1	0	20	21.5	115	25	746	6.86	3825.25	3.524	1.47	176.718	0.039	0.053	6.24078	13.5572	15.1581	8.91925	0.769123
2013-07-24	DRAL	Stream Burial	AL2	15	20	21.5	115	25	746	6.86	3046.73	2.968	1.134	140.751	0.033	0.041	4.81161	10.798	12.7687	8.91925	0.769123
2013-07-24	DRAL	Stream Burial	AL3	30	21	21.5	115	25	746	6.86	3305.48	3.104	1.207	152.705	0.035	0.043	5.29639	12.0784	13.6424	8.74514	0.784436
2013-07-24	DRAL	Stream Burial	AL4	45	20.5	21.5	113	25	746.1	6.86	3116.66	4.745	1.134	144.532	0.054	0.041	4.91699	11.2577	20.9471	8.83261	0.776668
2013-07-24	DRAL	Stream Burial	AL5	60	20	21.5	115	25	746.2	6.86	3430.05	3.426	1.239	158.494	0.038	0.044	5.25789	12.1559	14.7352	8.92165	0.768916
2013-07-24	DRGG	In-line SWM	GG1	0	21	24	115	24	746.9	NA	13738.7	138.572	4.018	595.996	1.485	0.135	16.474	47.0841	583.578	8.75569	NA
2013-07-24	DRGG	In-line SWM	GG2	15	21	24	114	21	746.9	NA	10127.6	101.167	3.324	428.286	0.973	0.108	13.1849	33.8349	382.63	8.75569	NA
2013-07-24	DRGG	In-line SWM	GG3	30	21	24	113	24	747	NA	9601.61	83.77	3.017	418.15	0.911	0.102	12.4304	33.0297	358.168	8.75686	NA
2013-07-24	DRGG	In-line SWM	GG4	45	21	24	115	25	747	NA	5249.33	34.726	1.817	229.779	0.386	0.062	7.53564	18.1503	151.519	8.75686	NA
2013-07-24	DRGG	In-line SWM	GG5	60	21	24	120	24	747.1	NA	8274.8	50.761	2.539	355.833	0.524	0.084	10.2881	28.1035	205.991	8.75803	NA
2013-07-24	DRIS	Stream Burial	IS1	0	22	22.5	115	25	747	4.86	8593.06	22.116	3.365	388.616	0.246	0.118	14.9168	31.6372	98.9139	8.58854	0.56587
2013-07-24	DRIS	Stream Burial	IS2	15	21.5	22.5	114	25	747	4.86	5468.52	12.784	2.192	247.776	0.144	0.077	9.58211	19.8703	57.0095	8.67197	0.560426
2013-07-24	DRIS	Stream Burial	IS3	30	22	22.5	115	24	747.1	4.86	7209.93	12.818	2.799	323.303	0.138	0.097	12.2714	26.3166	55.3257	8.58969	0.565795
2013-07-24	DRIS	Stream Burial	IS4	45	21	22.5	115	22	747.1	4.86	3125.4	5.962	1.252	137.724	0.059	0.043	5.191	10.8774	23.378	8.75803	0.554919
2013-07-24	DRIS	Stream Burial	IS5	60	21	22.5	110	25	747.1	4.86	6116.41	9.366	2.28	279.335	0.108	0.081	9.89755	22.0618	42.633	8.75803	0.554919
2013-07-24	DRKV	In-line SWM	KV1	0	18.5	21	113	25	746.6	4.76	12592.5	18.665	6.479	590.922	0.212	0.236	26.5558	43.2379	78.9297	9.19982	0.517401
2013-07-24	DRKV	In-line SWM	KV2	15	19	21	114	25	746.5	4.76	NA	NA	NA	NA	NA	NA	NA	NA	NA	9.10581	0.522743
2013-07-24	DRKV	In-line SWM	KV3	30	19	21	115	26	746.6	4.76	11449.3	14.98	5.974	539.751	0.173	0.219	25.0564	40.1148	65.2735	9.10703	0.522673
2013-07-24	DRKV	In-line SWM	KV4	45	19	21	114	25	746.6	4.76	11791.6	15.871	6.144	552.319	0.179	0.224	25.5565	41.0489	67.3442	9.10703	0.522673
2013-07-24	DRKV	In-line SWM	KV5	60	19	21	113	25	746.7	4.76	11303.4	15.887	5.831	530.484	0.18	0.213	24.3088	39.4208	67.926	9.10825	0.522603
2013-07-24	RRRB	Floodplain preservation	RB1	0	21.5	22	115	25	742.6	7.89	3181.12	45.254	1.024	144.797	0.504	0.036	4.52101	11.6807	201.564	8.62089	0.915219
2013-07-24	RRRB	Floodplain preservation	RB2	15	21	22	114	25	742.5	7.89	NA	NA	NA	NA	NA	NA	NA	NA	NA	8.70411	0.906468
2013-07-24	RRRB	Floodplain preservation	RB3	30	21	22	114	25	742.6	7.89	2899.5	52.411	0.949	132.225	0.589	0.034	4.13371	10.5063	232.743	8.70528	0.906346
2013-07-24	RRRB	Floodplain preservation	RB4	45	21	22	112	25	742.6	7.89	3040.89	45.228	0.954	139.204	0.516	0.034	4.17444	11.0609	203.969	8.70528	0.906346
2013-07-24	RRRB	Floodplain preservation	RB5	60	21	22	115	25	742.5	7.89	2341.8	44.999	0.762	106.582	0.502	0.027	3.31131	8.46993	198.34	8.70411	0.906468
2013-07-24	RRRM	Floodplain preservation	RM1	0	22.3	23.5	113	25	744	5.88	846.305	12.389	0.306	37.474	0.14	0.011	1.34722	3.09066	56.6825	8.50488	0.691368
2013-07-24	RRRM	Floodplain preservation	RM2	15	22.5	23.5	114	25	743.9	5.88	1650.38	40.289	0.313	72.927	0.451	0.011	1.38374	6.05151	183.692	8.47124	0.694113
2013-07-24	RRRM	Floodplain preservation	RM3	30	23	23.5	114	25	743.9	5.88	1613.9	34.811	0.316	71.315	0.39	0.011	1.42001	6.00637	160.364	8.39096	0.700754
2013-07-24	RRRM	Floodplain preservation	RM4	45	22.5	23.5	115	26	743.8	5.88	2571.7	148.973	0.309	114.405	1.713	0.011	1.38075	9.49467	697.677	8.4701	0.694207
2013-07-24	RRRM	Floodplain preservation	RM5	60	22	23.5	115	25	743.8	5.88	3222.43	328.71	0.294	142.103	3.651	0.01	1.2745	11.6184	1472.09	8.55175	0.687579
2013-07-24	RRSD	Septic Systems	SD1	0	15	17.5	114	25	741.4	7.11	17152.4	4.558	7.992	867.94	0.052	0.315	31.5366	57.174	17.9329	9.83117	0.72321
2013-07-24	RRSD	Septic Systems	SD2	15	15.5	17.5	114	25	741.3	7.11	17418.4	3.977	7.92	881.301	0.045	0.312	31.8104	59.0171	15.8351	9.72476	0.731123
2013-07-24	RRSD	Septic Systems	SD3	30	15.5	17.5	113	24	741.3	7.11	16261.7	3.816	7.455	817.77	0.042	0.292	29.7108	54.7627	14.7819	9.72476	0.731123
2013-07-24	RRSD	Septic Systems	SD4	45	15.5	17.5	115	25	741.3	7.11	NA	NA	NA	NA	NA	NA	NA	NA	NA	9.72476	0.731123
2013-07-24	RRSD	Septic Systems	SD5	60	15.5	17.5	115	25	741.2	7.11	15778.3	3.922	7.252	796.892	0.044	0.285	29.0656	53.3718	15.5007	9.72345	0.731222
2013-07-24	RRSM	Septic Systems	SM1	0	18.5	19.5	114	25	741.4	7.23	4129.38	7.781	1.395	199.148	0.088	0.052	5.92204	14.6739	32.9829	9.13575	0.791397
2013-07-24	RRSM	Septic Systems	SM2	15	18	19.5	115	25	741.4	7.23	1366.79	3.524	NA	NA	NA	NA	NA	NA	NA	9.22959	0.78335
2013-07-24	RRSM	Septic Systems	SM3	30	18.5	19.5	114	24	741.4	7.23	3634.76	5.304	1.26	173.872	0.058	0.047	5.29301	12.8115	21.708	9.13575	0.791397
2013-07-24	RRSM	Septic Systems	SM4	45	18.5	19.5	115	25	741.4	7.23	3624.46	7.145	1.266	174.489	0.08	0.047	5.35946	12.8569	30.059	9.13575	0.791397
2013-07-24	RRSM	Septic Systems	SM5	60	18.5	19.5	114	25	741.4	7.23	3158.29	6.42	1.111	152.315	0.073	0.042	4.71746	11.2231	27.2133	9.13575	0.791397
2013-08-16	DRAL	Stream Burial	AL1	0	18	19.5	113	24	754.7	8.35	2785.57	4.621	1.56	135.403	0.051	0.059	6.42711	9.64844	18.5559	9.39516	0.888755
2013-08-16	DRAL	Stream Burial	AL2	15	18.5	19.5	112	25	754.7	8.35	2080.26	4.873	1.092	102.123	0.056	0.042	4.63477	7.39216	20.6578	9.29963	0.897885
2013-08-16	DRAL	Stream Burial	AL3	30	18	19.5	113	24	754.9	8.35	2380.38	2.281	1.225	115.732	0.025	0.046	5.04545	8.24454	9.15885	9.39765	0.88852
2013-08-16	DRAL	Stream Burial	AL4	45	18.5	19.5	113	24	755.1	8.35	1457.84	4.201	0.667	70.894	0.046	0.025	2.7969	5.12893	17.0515	9.30456	0.897409
2013-08-16	DRAL	Stream Burial	AL5	60	19	19.5	113	25	755.2	8.35	2408.45	2.273	1.208	118.084	0.026	0.046	5.20266	8.67622	9.66048	9.21193	0.906433
2013-08-16	DRGG	In-line SWM	GG1	0	19	20	113	25	755.5	5.6	6448.13	45.082	2.841	312.562	0.514	0.107	12.0902	22.9563	191.303	9.21559	0.607666
2013-08-16	DRGG	In-line SWM	GG2	15	19	20	115	25	755.5	5.6	4382.69	31.962	2.2	211.692	0.359	0.083	9.31872	15.5478	133.588	9.21559	0.607666
2013-08-16	DRGG	In-line SWM	GG3	30	19	20	114	24	755.5	5.6	5600.91	32.412	2.599	268.819	0.354	0.097	10.9193	19.7436	131.776	9.21559	0.607666
2013-08-16	DRGG	In-line SWM	GG4	45	19	20	114	25	755.7	5.6	4936.65	24.836	2.255	238.919	0.281	0.085	9.57167	17.5429	104.568	9.21803	0.607505
2013-08-16	DRGG	In-line SWM	GG5	60	19	20	115	24	755.8	5.6	102.043	0.31	0.004	NA	NA	NA	NA	NA	NA	9.21925	0.607424
2013-08-16	DRIS	Stream Burial	IS1	0	19	20.5	113	25	755.4	6.79	80.675	0.276	-0.007	NA	NA	NA	NA	NA	NA	9.21437	0.736892
2013-08-16	DRIS	Stream Burial	IS2	15	19	20.5	114	25	755.4	6.79	7266.96	10.804	3.079	347.529	0.122	0.114	12.919	25.5278	45.4403	9.21437	0.736892
2013-08-16	DRIS	Stream Burial	IS3	30	19	20.5	12.5	26	755.4	6.79	5751.77	6.24	2.437	752.304	0.588	0.293	33.0544	55.2607	218.95	9.21437	0.736892
2013-08-16	DRIS	Stream Burial	IS4	45	19	20.5	114	24	755.4	6.79	6414.05	5.795	2.685	304.231	0.063	0.099	11.1458	22.3473	23.5292	9.21437	0.736892
2013-08-16	DRIS	Stream Burial	IS5	60	19	20.5	118	23	755.5	6.79	6142.21	5.152	2.47	287.092	0.053	0.089	10.0587	21.0856	19.5824	9.21559	0.736795
2013-08-16	DRKV	In-line SWM	KV1	0	17	18.5	113.5	25	755.2	6.1	12415.4	11.862	7.407	622.853	0.135	0.289	30.4767	42.9692	48.1613	9.59798	0.63555
2013-08-16	DRKV	In-line SWM	KV2	15	17	18.5	114	25	755.3	6.1	11742.3	11.056	7.115	588.64	0.126	0.277	29.2442	40.6035	44.7161	9.59925	0.635466
2013-08-16	DRKV	In-line SWM	KV3	30	17	18.5	114	23	755.3	6.1	433.322	2.23	0.264	21.383	0.024	0.01	1.06393	1.47499	8.3973	9.59925	0.635466
2013-08-16	DRKV	In-line SWM	KV4	45	17	18.5	113	24	755.3	6.1	7892.08	7.646	4.913	393.197	0.085	0.19	20.0329	27.1222	30.0839	9.59925	0.635466
2013-08-16	DRKV	In-line SWM	Kv5	60	17	18.5	115.5	25	755.4	6.1	10843.6	10.422	6.521	542.268	0.117	0.253	26.713	37.3999	41.6756	9.60052	0.635382
2013-08-16	RRRB	Floodplain preservation	RB1	0	18.5	20	114	28	753.3	6.61	2578.96	33.431	0.728	127.524	0.417	0.028	3.13745	9.24798	154.069	9.28238	0.712102
2013-08-16	RRRB	Floodplain preservation	RB2	15	19	20	111	25	753.3	6.61	1895.7	39.16	0.609	92.015	0.453	0.023	2.60606	6.77782	169.193	9.18876	0.719357
2013-08-16	RRRB	Floodplain preservation	RB3	30	19	20	112	25	753.5	6.61	2247.58	46.663	0.731	108.916	0.536	0.028	3.12056	8.02063	200.001	9.1912	0.719166
2013-08-16	RRRB	Floodplain preservation	RB4	45	19.5	20	114	25	753.7	6.61	1863.29	29.944	0.617	89.987	0.339	0.023	2.66741	6.72847	127.756	9.10165	0.726242
2013-08-16	RRRB	Floodplain preservation	RB5	60	20	20	115	27	753.4	6.61	1767.14	26.177	0.527	86.537	0.314	0.02	2.35902	6.57362	119.842	9.00773	0.733814
2013-08-16	RRRM	Floodplain preservation	RM1	0	18.4	19.5	115	26	752.6	8.25	1206.12	5.379	0.305	59.233	0.063	0.012	1.297	4.28609	23.0591	9.29267	0.887797
2013-08-16	RRRM	Floodplain preservation	RM2	15	18.4	19.5	113	25	752.6	8.25	1153.26	23.645	0.29	56.388	0.27	0.011	1.22459	4.08022	99.4773	9.29267	0.887797
2013-08-16	RRRM	Floodplain preservation	RM3	30	18.3	19.5	114	24	752.7	8.25	974.579	21.143	0.294	47.191	0.231	0.011	1.22034	3.40358	85.0271	9.31289	0.885869
2013-08-16	RRRM	Floodplain preservation	RM4	45	18.5	19.5	114.5	25	752.7	8.25	1554.3	5.452	0.291	75.803	0.062	0.011	1.22723	5.50161	22.7251	9.27499	0.889489
2013-08-16	RRRM	Floodplain preservation	RM5	60	18.4	19.5	115	25	752.8	8.25	1836.25	184.597	0.284	89.486	2.075	0.011	1.19257	6.47349	764.773	9.29514	0.887561
2013-08-16	RRSD	Septic Systems	SD1	0	15	17	115	25	750.5	7.73	16353.1	4.454	8.454	844.699	0.05	0.34	33.608	54.9684	17.2355	9.95184	0.776741
2013-08-16	RRSD	Septic Systems	SD2	15	16	17	112	25	750.5	7.73	16648.1	4.111	8.486	864.258	0.048	0.343	35.1759	58.1006	16.6606	9.7411	0.793545
2013-08-16	RRSD	Septic Systems	SD3	30	16	17	112	25	750.5	7.73	16322.8	4.085	8.421	847.369	0.047	0.341	34.9052	56.9652	16.5564	9.7411	0.793545
2013-08-16	RRSD	Septic Systems	SD4	45	15	17	114	25	750.1	7.73	15259.7	4.578	7.726	789.178	0.052	0.311	30.7824	51.3828	17.8576	9.94653	0.777155
2013-08-16	RRSD	Septic Systems	SD5	60	15.5	17	115	25	750.6	7.73	15103.2	3.468	7.691	780.222	0.039	0.309	31.1208	51.6009	13.5793	9.84677	0.785029
2013-08-16	RRSM	Septic Systems	SM1	0	17	18.5	115	25	750.6	9.05	3796.51	5.898	1.373	189.042	0.066	0.053	5.63938	13.1215	23.8008	9.53952	0.948685
2013-08-16	RRSM	Septic Systems	SM2	15	17	18.5	111	25	750.7	9.05	3558.69	4.951	1.281	178.463	0.058	0.05	5.31021	12.3855	20.5962	9.54079	0.948559
2013-08-16	RRSM	Septic Systems	SM3	30	17	18.5	112	20	750.7	9.05	2540.17	3.798	0.883	122.101	0.036	0.033	3.46458	8.47396	12.9718	9.54079	0.948559
2013-08-16	RRSM	Septic Systems	SM4	45	16.5	18.5	114	25	750.8	9.05	3329.31	5.259	1.254	166.097	0.06	0.049	5.07075	11.3428	21.1354	9.64257	0.938547
2013-08-16	RRSM	Septic Systems	SM5	60	16.5	18.5	114	23	750.8	9.05	451.43	2.221	0.288	22.168	0.023	0.011	1.14273	1.51389	8.31166	9.64257	0.938547
2013-08-27	DRAL	Stream Burial	AL1	0	20	25	115	24	748.8	8.15	2586.93	3.839	1.389	110.071	0.041	0.046	5.38372	8.41267	15.7533	8.95273	0.910337
2013-08-27	DRAL	Stream Burial	AL2	15	20	25	115	25	748.9	8.15	2627.06	3.817	1.484	112.809	0.042	0.049	5.82015	8.62079	16.2252	8.95393	0.910215
2013-08-27	DRAL	Stream Burial	AL3	30	20	25	114	21	749.1	8.15	1227.65	2.794	0.622	50.911	0.027	0.02	2.32864	3.88955	10.288	8.95632	0.909972
2013-08-27	DRAL	Stream Burial	AL4	45	20	25	115	25	749.1	8.15	2779.62	4.486	2.274	119.384	0.05	0.076	8.91634	9.12085	19.068	8.95632	0.909972
2013-08-27	DRAL	Stream Burial	AL5	60	22	25	120	23	749	8.15	2960.73	7.651	1.591	123.754	0.076	0.051	6.43938	10.0479	30.4262	8.61153	0.946405
2013-08-27	DRGG	In-line SWM	GG1	0	20.5	22	115	25	750.3	5.18	9389.77	57.055	3.512	430.887	0.637	0.125	14.9603	33.3741	246.553	8.88233	0.58318
2013-08-27	DRGG	In-line SWM	GG2	15	20.5	22	115	25	750.4	5.18	8740.57	60.619	3.358	401.139	0.677	0.12	14.3029	31.0658	261.925	8.88351	0.583103
2013-08-27	DRGG	In-line SWM	GG3	30	21	22	115	24	750.4	5.18	7281.46	40.06	2.769	331.351	0.432	0.098	11.8623	26.0549	168.874	8.79672	0.588856
2013-08-27	DRGG	In-line SWM	GG4	45	20.5	22	115	25	750.4	5.18	6727.73	33.046	2.58	308.762	0.369	0.092	10.9917	23.9118	142.785	8.88351	0.583103
2013-08-27	DRGG	In-line SWM	GG5	60	21	22	120	25	750.5	5.18	6016.82	24.881	2.254	273.734	0.268	0.079	9.6517	21.5214	104.717	8.79789	0.588777
2013-08-27	DRIS	Stream Burial	IS1	0	21	25	115	25	750	4.91	8026.15	11.927	3.211	345.042	0.132	0.107	13.014	27.1459	51.7385	8.79203	0.55846
2013-08-27	DRIS	Stream Burial	IS2	15	21	25	115	25	750.1	4.91	490.512	2.096	0.264	21.089	0.023	0.009	1.07067	1.65895	9.09297	8.7932	0.558386
2013-08-27	DRIS	Stream Burial	IS3	30	21.5	25	115	21	750.1	4.91	8782.17	4.72	0.341	363.962	0.045	0.011	1.33825	29.0671	17.7962	8.70795	0.563852
2013-08-27	DRIS	Stream Burial	IS4	45	21	25	115	25	750.3	4.91	9940.74	6.601	5.42	427.483	0.073	0.181	21.9637	33.6184	28.6252	8.79555	0.558237
2013-08-27	DRIS	Stream Burial	IS5	60	20.5	25	120	22	750.3	4.91	8792.95	5.752	4.973	364.77	0.055	0.158	18.9157	28.2531	21.2976	8.88233	0.552783
2013-08-27	DRKV	In-line SWM	KV1	0	18	21	115	25	749.9	5.92	11908.6	3.633	6.638	558.735	0.041	0.242	26.5854	40.0687	14.906	9.33541	0.634145
2013-08-27	DRKV	In-line SWM	KV2	15	18.5	21	113	25	749.9	5.92	11826.8	3.44	6.626	556.929	0.039	0.243	27.1255	40.5713	14.4931	9.24049	0.640659
2013-08-27	DRKV	In-line SWM	KV3	30	18	21	115	24	750	5.92	10705.7	3.124	6.105	498.2	0.034	0.22	24.1904	35.7228	12.3714	9.33666	0.63406
2013-08-27	DRKV	In-line SWM	KV4	45	18	21	114	25	749.9	5.92	10328.1	2.812	5.923	485.46	0.032	0.216	23.7782	34.8139	11.6248	9.33541	0.634145
2013-08-27	DRKV	In-line SWM	Kv5	60	19	21	120	25	750	5.92	8077.15	3.807	4.693	375.748	0.041	0.169	19.235	27.7994	15.3945	9.14851	0.6471
2013-08-27	RRRB	Floodplain preservation	RB1	0	21.5	23	115	25	747.7	7.5	3082.84	22.064	0.816	137.997	0.246	0.028	3.51543	11.0562	97.451	8.68009	0.864046
2013-08-27	RRRB	Floodplain preservation	RB2	15	21	23	115	25	747.7	7.5	2501.6	41.894	0.653	111.979	0.466	0.023	2.76696	8.83694	183.084	8.76507	0.855669
2013-08-27	RRRB	Floodplain preservation	RB3	30	22	23	115	24	747.6	7.5	2254.74	40.633	0.637	100.044	0.436	0.022	2.76018	8.13803	175.062	8.59544	0.872556
2013-08-27	RRRB	Floodplain preservation	RB4	45	22	23	115	24	747.6	7.5	1894.44	23.514	0.583	84.057	0.253	0.02	2.52705	6.83759	101.306	8.59544	0.872556
2013-08-27	RRRB	Floodplain preservation	RB5	60	22	23	120	25	747.6	7.5	1735.43	12.927	0.505	76.974	0.139	0.017	2.18712	6.26139	55.6087	8.59544	0.872556
2013-08-27	RRRM	Floodplain preservation	RM1	0	21	22	125	24	747.6	7.12	1572.45	60.674	0.376	70.173	0.608	0.013	1.5789	5.53854	238.864	8.7639	0.812424
2013-08-27	RRRM	Floodplain preservation	RM2	15	21	22	116	25	747.6	7.12	1385.21	15.023	0.346	63.27	0.166	0.012	1.49814	4.99369	65.3297	8.7639	0.812424
2013-08-27	RRRM	Floodplain preservation	RM3	30	21	22	115	25	747.6	7.12	1129.56	19.413	0.32	51.687	0.217	0.011	1.38831	4.07952	85.057	8.7639	0.812424
2013-08-27	RRRM	Floodplain preservation	RM4	45	21	22	115	25	747.6	7.12	1794.48	81.321	0.323	82.113	0.907	0.011	1.3985	6.48093	356.307	8.7639	0.812424
2013-08-27	RRRM	Floodplain preservation	RM5	60	20.5	22	120	25	747.6	7.12	2567.81	297.945	0.307	116.463	3.204	0.011	1.29333	9.05313	1244.79	8.85037	0.804487
2013-08-27	RRSD	Septic Systems	SD1	0	16	19	115	25	744.6	7.51	18116.2	5.133	0.29	885.589	0.058	0.011	1.13899	60.0063	20.3541	9.66452	0.777069
2013-08-27	RRSD	Septic Systems	SD2	15	15	19	115	25	744.6	7.51	18397.9	5.261	8.198	899.363	0.059	0.312	31.0709	58.9894	20.3791	9.8736	0.760614
2013-08-27	RRSD	Septic Systems	SD3	30	15.5	19	116	25	744.5	7.51	2198.86	2.092	0.832	107.293	0.023	0.032	3.20308	7.15412	8.13802	9.76674	0.768936
2013-08-27	RRSD	Septic Systems	SD4	45	15	19	114	25	744.5	7.51	18774.1	4.385	8.169	919.25	0.05	0.311	31.0309	60.3018	17.116	9.87227	0.760716
2013-08-27	RRSD	Septic Systems	SD5	60	15	19	120	25	744.7	7.51	16608.8	4.188	7.335	805.283	0.045	0.276	27.5031	52.8116	15.6369	9.87493	0.760512
2013-08-27	RRSM	Septic Systems	SM1	0	17.5	21	115	25	744.8	8.37	4520.38	8.046	1.578	210.946	0.09	0.057	6.22557	14.9924	32.835	9.36796	0.893471
2013-08-27	RRSM	Septic Systems	SM2	15	17.5	21	115	26	744.8	8.37	4386.69	5.752	1.507	206.409	0.067	0.055	6.00788	14.6699	24.2891	9.36796	0.893471
2013-08-27	RRSM	Septic Systems	SM3	30	17.5	21	114	25	744.7	8.37	1812.85	2.275	0.347	84.743	0.026	0.013	1.37278	6.02367	9.35686	9.3667	0.893591
2013-08-27	RRSM	Septic Systems	SM4	45	17.5	21	112	25	744.7	8.37	3854.34	7.826	1.378	180.847	0.09	0.05	5.47217	12.8549	32.682	9.3667	0.893591
2013-08-27	RRSM	Septic Systems	SM5	60	17.5	21	119	25	744.8	8.37	3723.7	7.638	1.36	172.555	0.083	0.049	5.31443	12.2639	30.2604	9.36796	0.893471
2013-09-11	DRAL	Stream Burial	AL1	0	20.5	24	112	25	752.6	8.62	2392.65	2.89	1.161	105.966	0.033	0.04	4.75953	8.18246	12.6846	8.90956	0.9675
2013-09-11	DRAL	Stream Burial	AL2	15	20.4	24	114	25	752.7	8.62	2448.44	NA	1.071	108.02	NA	0.037	4.35354	8.31453	NA	8.92834	0.965465
2013-09-11	DRAL	Stream Burial	AL3	30	20.3	24	113	24	752.6	8.62	2807.64	2.77	1.195	122.99	0.03	0.041	4.8006	9.43911	11.5906	8.94481	0.963687
2013-09-11	DRAL	Stream Burial	AL4	45	20.5	24	119	25	752.7	8.62	2832.7	3.105	1.265	123.809	0.033	0.043	5.09915	9.559	12.9243	8.91074	0.967372
2013-09-11	DRAL	Stream Burial	AL5	60	20	24	120	26	752.2	8.62	2821.55	2.778	1.238	124.086	0.031	0.042	4.94806	9.44099	11.7592	8.99338	0.958483
2013-09-11	DRGG	In-line SWM	GG1	0	21	24	115	26	754.9	6.07	9871.07	86.896	3.205	439.471	1	0.111	13.4027	34.3506	388.79	8.84947	0.685917
2013-09-11	DRGG	In-line SWM	GG2	15	22	24	117	25	754.9	6.07	5382.67	39.06	2.211	236.664	0.428	0.075	9.40479	19.0651	169.905	8.67937	0.69936
2013-09-11	DRGG	In-line SWM	GG3	30	21.5	24	115	23	754.9	6.07	5224.33	27.555	2.088	226.516	0.285	0.07	8.57962	17.9752	112	8.76368	0.692632
2013-09-11	DRGG	In-line SWM	GG4	45	22	24	113	27	755	6.07	6042.94	22.601	2.197	272.529	0.273	0.077	9.65443	21.9515	108.412	8.68052	0.699267
2013-09-11	DRGG	In-line SWM	GG5	60	22	24	121	26	755	6.07	5248.56	14.284	1.843	231.072	0.157	0.063	7.85275	18.6122	62.4279	8.68052	0.699267
2013-09-11	DRIS	Stream Burial	IS1	0	21	24	114	25	754.2	5.37	13342	70.103	4.636	589.534	0.785	0.159	19.2219	46.1228	305.652	8.84127	0.607379
2013-09-11	DRIS	Stream Burial	IS2	15	21	24	113	25	754.2	5.37	12026.3	20.444	4.115	532.439	0.231	0.141	17.1033	41.6559	89.8263	8.84127	0.607379
2013-09-11	DRIS	Stream Burial	IS3	30	21	24	114	25	754.2	5.37	9173.89	13.609	3.092	405.362	0.152	0.106	12.8187	31.7139	59.3357	8.84127	0.607379
2013-09-11	DRIS	Stream Burial	IS4	45	21	24	121	26	754.1	5.37	9764.83	12.062	3.234	429.504	0.133	0.11	13.332	33.6071	51.6724	8.84009	0.60746
2013-09-11	DRIS	Stream Burial	IS5	60	21.5	24	120	26	754.3	5.37	10147.6	12.63	3.169	447.243	0.14	0.108	13.3111	35.5194	55.0625	8.75671	0.613244
2013-09-11	DRKV	In-line SWM	KV1	0	17.1	22	116	26	754.3	8.23	12641.7	1.099	6.01	586.359	0.013	0.217	22.9564	40.6291	4.50066	9.56658	0.860287
2013-09-11	DRKV	In-line SWM	KV2	15	17.6	22	117	25	754.1	8.23	11480.2	0.901	5.632	527.018	0.01	0.2	21.6078	37.1118	3.58216	9.46534	0.869488
2013-09-11	DRKV	In-line SWM	KV3	30	17.7	22	115	24	754.2	8.23	10663.9	1.077	5.38	487.227	0.012	0.19	20.582	34.414	4.20511	9.44707	0.871169
2013-09-11	DRKV	In-line SWM	KV4	45	17.9	22	102	25	754.3	8.23	10504.6	1.404	5.175	497.053	0.017	0.191	20.8491	35.3258	6.33265	9.40949	0.874649
2013-09-11	DRKV	In-line SWM	KV5	60	17.9	22	124	26	754.4	8.23	6338.84	1.356	3.293	289.956	0.015	0.117	12.6986	20.6046	5.33968	9.41074	0.874533
2013-09-14	RRRB	Floodplain preservation	RB1	0	16.5	18	113	25	749.8	7.64	1865.44	14.851	0.704	94.26	0.17	0.028	2.89226	6.4456	60.2939	9.62972	0.793377
2013-09-14	RRRB	Floodplain preservation	RB2	15	16.7	18	115	27	749.8	7.64	1919.72	45.19	0.657	98.162	0.545	0.026	2.75621	6.75564	194.034	9.58935	0.796717
2013-09-14	RRRB	Floodplain preservation	RB3	30	17.1	18	114	25	749.8	7.64	1529.4	31.179	0.583	77.148	0.354	0.023	2.43981	5.37769	127.372	9.5095	0.803407
2013-09-14	RRRB	Floodplain preservation	RB4	45	17	18	114	25	749.8	7.64	476.739	NA	0.367	24.048	NA	0.014	1.52852	1.67098	NA	9.52935	0.801733
2013-09-14	RRRB	Floodplain preservation	RB5	60	17.5	18	115	27	749.8	7.64	1389.21	8.836	0.499	71.035	0.107	0.02	2.15191	5.01496	38.6388	9.43085	0.810107
2013-09-14	RRRM	Floodplain preservation	RM1	0	17.4	18	113	25	749.8	6.95	2278.04	71.589	0.427	115.108	0.82	0.017	1.80735	8.10072	296.698	9.4504	0.735418
2013-09-14	RRRM	Floodplain preservation	RM2	15	17.4	18	117	25	749.7	6.95	5699.12	309.097	0.447	286.021	3.437	0.017	1.87716	20.1313	1243.48	9.44914	0.735516
2013-09-14	RRRM	Floodplain preservation	RM3	30	17.3	18	113	25	749.7	6.95	3069.42	56.646	0.447	155.08	0.649	0.018	1.88569	10.8805	234.265	9.46877	0.733992
2013-09-14	RRRM	Floodplain preservation	RM4	45	17.5	18	114	25	749.8	6.95	3128.74	41.425	0.42	157.823	0.471	0.016	1.78176	11.1421	170.776	9.43085	0.736943
2013-09-14	RRRM	Floodplain preservation	RM5	60	18	18	117	25	749.8	6.95	4401.1	421.17	0.361	220.901	4.683	0.014	1.54844	15.8437	1717.25	9.33417	0.744576
2013-09-14	RRSD	Septic Systems	SD1	0	14.7	15	115	25	747	7.06	15973.8	3.852	6.744	864.866	0.044	0.285	27.9717	55.9908	14.9586	9.96995	0.708128
2013-09-14	RRSD	Septic Systems	SD2	15	15	15	114	25	747	7.06	16043.2	4.076	6.656	869.987	0.047	0.281	27.9579	56.8793	16.0584	9.90542	0.712741
2013-09-14	RRSD	Septic Systems	SD3	30	15	15	115	25	747	7.06	16532.5	4.084	6.931	895.117	0.047	0.292	29.0551	58.5223	15.9729	9.90542	0.712741
2013-09-14	RRSD	Septic Systems	SD4	45	15	15	113	25	747	7.06	14427.4	4.291	6.139	783.613	0.05	0.26	25.8386	51.2322	17.0322	9.90542	0.712741
2013-09-14	RRSD	Septic Systems	SD5	60	14.5	15	120	25	747	7.06	14200.9	3.397	6.002	763.138	0.037	0.251	24.4801	49.0809	12.6618	10.0134	0.705057
2013-09-14	RRSM	Septic Systems	SM1	0	14.6	16	115	25	747	8.8	4040.51	7.474	1.393	213.214	0.085	0.057	5.60687	13.758	28.8571	9.99162	0.880738
2013-09-14	RRSM	Septic Systems	SM2	15	15	16	115	27	747	8.8	3742.29	5.451	1.302	200.38	0.066	0.055	5.41883	13.1007	22.6975	9.90542	0.888402
2013-09-14	RRSM	Septic Systems	SM3	30	15	16	115	25	747	8.8	3291.95	5.786	1.224	173.713	0.066	0.05	4.99646	11.3573	22.5519	9.90542	0.888402
2013-09-14	RRSM	Septic Systems	SM4	45	15	16	115	25	747	8.8	3379.47	11.044	1.236	178.332	0.125	0.051	5.04885	11.6592	43.0489	9.90542	0.888402
2013-09-14	RRSM	Septic Systems	SM5	60	15	16	120	25	747	8.8	3204.51	8.406	1.199	167.805	0.092	0.049	4.84937	10.971	31.6007	9.90542	0.888402
2013-09-28	RRSD	Septic Systems	SD1	0	16	16	120	25	753.5	7.58	18936.1	4.602	8.034	1006.27	0.052	0.332	32.7508	65.2393	17.8229	9.78004	0.775048
2013-09-28	RRSD	Septic Systems	SD2	15	15.5	16	125	27	753.4	7.58	18364.3	5.458	8.075	978.89	0.063	0.335	32.9274	63.2565	21.3904	9.8835	0.766935
2013-09-28	RRSD	Septic Systems	SD3	30	15	16	124.5	25	753.4	7.58	17103.9	4.549	7.492	931.927	0.058	0.32	31.5262	60.4113	19.6927	9.99029	0.758737
2013-09-28	RRSD	Septic Systems	SD4	45	15.5	16	118	25	753.4	7.58	12185.2	3.909	5.525	638.503	0.042	0.224	21.5713	40.4484	13.9081	9.8835	0.766935
2013-09-28	RRSD	Septic Systems	SD5	60	15.3	16	115	26	753.4	7.58	13772.5	3.887	6.189	732.441	0.044	0.256	24.63	46.4054	14.8562	9.92597	0.763654
2013-09-28	RRSM	Septic Systems	SM1	0	15	16	119.5	26	753.3	9.35	4014.64	6.617	1.369	211.732	0.073	0.056	5.72322	14.1772	25.2772	9.98896	0.936033
2013-09-28	RRSM	Septic Systems	SM2	15	14.9	16	113	25	753.3	9.35	3924.8	4.207	1.376	208.313	0.048	0.057	5.69822	13.7258	16.383	10.0106	0.934013
2013-09-28	RRSM	Septic Systems	SM3	30	15	16	105	26	753.4	9.35	3190.16	3.786	1.187	167.159	0.04	0.048	4.75119	10.836	13.6957	9.99029	0.935909
2013-09-28	RRSM	Septic Systems	SM4	45	14.3	16	119.5	24	753.4	9.35	3313.79	6.186	1.234	175.272	0.069	0.051	5.09017	11.5488	23.6977	10.1433	0.921789
2013-09-28	RRSM	Septic Systems	SM5	60	14.3	16	119	26	753.3	9.35	2967.01	4.826	1.127	158.812	0.057	0.047	4.68466	10.3962	19.449	10.142	0.921911
2013-09-28	RRRB	Floodplain preservation	RB1	0	17	17	120	25	756.2	15.4	1675.83	4.975	0.571	86.42	0.054	0.023	2.40821	5.95402	19.3271	9.61069	1.60238
2013-09-28	RRRB	Floodplain preservation	RB2	15	17	17	115	24	756.2	15.4	1648.16	25.55	0.577	85.02	0.28	0.023	2.43236	5.85758	99.4013	9.61069	1.60238
2013-09-28	RRRB	Floodplain preservation	RB3	30	16.5	17	119.5	25	756.2	15.4	1561.4	18.839	0.605	80.58	0.207	0.024	2.50777	5.4635	72.6079	9.71192	1.58568
2013-09-28	RRRB	Floodplain preservation	RB4	45	15.4	17	120	25	756.2	15.4	1289.02	10.101	0.535	66.473	0.11	0.021	2.13245	4.34952	37.8112	9.9415	1.54906
2013-09-28	RRRB	Floodplain preservation	RB5	60	15.2	17	120	25	756.2	15.4	1187.03	5.449	0.489	61.213	0.06	0.02	1.93389	3.97934	20.3013	9.98429	1.54242
2013-09-28	RRRM	Floodplain preservation	RM1	0	17	17	120	25	755.5	8.9	1743.17	55.361	0.409	89.824	0.605	0.016	1.7249	6.19431	215.233	9.60179	0.92691
2013-09-28	RRRM	Floodplain preservation	RM2	15	16.5	17	114	26	755.4	8.9	1802.1	16.153	0.37	94.437	0.191	0.015	1.56593	6.40986	67.0923	9.70164	0.91737
2013-09-28	RRRM	Floodplain preservation	RM3	30	15.9	17	114	26.5	755.4	8.9	1857.37	17.532	0.37	97.696	0.21	0.015	1.54075	6.50407	72.9993	9.82554	0.905802
2013-09-28	RRRM	Floodplain preservation	RM4	45	16.5	17	116	26	755.4	8.9	1853.41	15.535	0.364	96.801	0.181	0.015	1.53355	6.57029	63.5639	9.70164	0.91737
2013-09-28	RRRM	Floodplain preservation	RM5	60	17	17	120	25	755.4	8.9	4426.94	404.481	0.304	228.093	4.42	0.012	1.28217	15.7314	1572.71	9.60052	0.927033
2013-09-28	DRKV	In-line SWM	KV1	0	16	17.5	116	25	757.5	7.4	10632.3	1.192	5.969	545.642	0.013	0.238	24.1702	36.3424	4.64352	9.83195	0.752648
2013-09-28	DRKV	In-line SWM	KV2	15	15.5	17.5	115	27.5	757.5	7.4	10265.7	1.113	5.837	537.639	0.014	0.239	23.8337	35.2335	4.68703	9.93728	0.74467
2013-09-28	DRKV	In-line SWM	KV3	30	15.5	17.5	113	26	757.6	7.4	9622.39	1.003	5.578	500.121	0.012	0.226	22.5504	32.7705	4.08587	9.9386	0.744572
2013-09-28	DRKV	In-line SWM	KV4	45	15.1	17.5	119	26	757.6	7.4	9160.14	0.766	5.251	471.357	0.009	0.21	20.6648	30.4854	2.95684	10.0243	0.738203
2013-09-28	DRKV	In-line SWM	KV5	60	15	17.5	118	27	757.6	7.4	8505.44	2.456	4.935	441.584	0.029	0.2	19.5745	28.4666	9.83746	10.046	0.736613
2013-09-28	DRGG	In-line SWM	GG1	0	17	17.5	117	25.5	757.6	2.84	8834.47	536.01	4.933	454.387	6.08	0.197	20.7419	31.2478	2157.18	9.62848	0.294958
2013-09-28	DRGG	In-line SWM	GG2	15	17	17.5	114	25	757.6	2.84	5956.64	161.279	2.382	306.729	1.839	0.095	10.0307	21.0935	652.516	9.62848	0.294958
2013-09-28	DRGG	In-line SWM	GG3	30	17	17.5	113	25.5	757.6	2.84	7035.58	326.43	3.052	364.284	3.815	0.123	12.9426	25.0515	1353.57	9.62848	0.294958
2013-09-28	DRGG	In-line SWM	GG4	45	17	17.5	114	26.5	757.6	2.84	5528.15	59.276	1.85	287.908	0.711	0.075	7.90583	19.7992	252.161	9.62848	0.294958
2013-09-28	DRGG	In-line SWM	GG5	60	17	17.5	120	24.5	757.6	2.84	5439.83	113.295	2.15	276.446	1.215	0.085	8.90221	19.0109	431.256	9.62848	0.294958
2013-09-28	DRIS	Stream Burial	IS1	0	17	18	119	25	757.4	6.68	11096.7	37.089	3.949	559.767	0.407	0.155	16.2501	38.5049	144.458	9.62594	0.693958
2013-09-28	DRIS	Stream Burial	IS2	15	17	18	114	25	757.4	6.68	10342	20.244	3.532	525.943	0.23	0.14	14.6867	36.1782	81.7992	9.62594	0.693958
2013-09-28	DRIS	Stream Burial	IS3	30	17	18	119	26	757.4	6.68	7771.05	12.958	2.839	394.917	0.147	0.112	11.7947	27.1653	52.1947	9.62594	0.693958
2013-09-28	DRIS	Stream Burial	IS4	45	17	18	114	25	757.4	6.68	5785.19	6.099	2.118	294.207	0.069	0.084	8.80877	20.2377	24.6429	9.62594	0.693958
2013-09-28	DRIS	Stream Burial	IS5	60	17	18	115	25	757.4	6.68	8899.53	11.532	3.09	451.831	0.13	0.122	12.8233	31.0802	46.2494	9.62594	0.693958
2013-09-28	DRAL	Stream Burial	AL1	0	17.5	18	120	25	765.2	7.92	1463.52	4.598	0.731	74.331	0.05	0.029	3.04826	5.14205	17.8274	9.62455	0.822896
2013-09-28	DRAL	Stream Burial	AL2	15	17.5	18	120	26	765.2	7.92	1826.27	1.899	0.887	93.433	0.021	0.035	3.73305	6.46349	7.61234	9.62455	0.822896
2013-09-28	DRAL	Stream Burial	AL3	30	17.5	18	121	23	765.2	7.92	1900.13	2.144	0.877	94.96	0.022	0.034	3.58002	6.56908	7.6946	9.62455	0.822896
2013-09-28	DRAL	Stream Burial	AL4	45	17.5	18	114	25	765.2	7.92	1782.21	2.052	0.845	91.388	0.023	0.034	3.5673	6.32202	8.31379	9.62455	0.822896
2013-09-28	DRAL	Stream Burial	AL5	60	17.2	18	113	25	765.2	7.92	1346.08	3.299	0.837	69.141	0.038	0.033	3.50394	4.73765	13.3732	9.68464	0.81779
2013-11-07	RRSD	Septic Systems	SD1	0	14.1	14.5	115	25	746.9	6.84	18296.6	7.92	8.024	1003.54	0.09	0.343	33.0124	63.7033	30.3689	10.0999	0.677233
2013-11-07	RRSD	Septic Systems	SD2	15	13.5	14.5	115	25	746.9	6.84	4410.27	2.811	2.324	241.895	0.032	0.099	9.3563	15.0519	10.6248	10.2344	0.668337
2013-11-07	RRSD	Septic Systems	SD3	30	13.5	14.5	115	25	746.9	6.84	18054.8	5.906	7.642	990.273	0.067	0.327	30.7687	61.6195	22.3178	10.2344	0.668337
2013-11-07	RRSD	Septic Systems	SD4	45	14	14.5	115	25	746.9	6.84	17670.8	5.66	7.704	969.209	0.065	0.329	31.5825	61.3206	21.6499	10.1221	0.675749
2013-11-07	RRSD	Septic Systems	SD5	60	13.5	14.5	120	25	746.9	6.84	16935.5	5.181	7.282	922.04	0.057	0.308	29.0421	57.3737	18.8877	10.2344	0.668337
2013-11-07	RRSM	Septic Systems	SM1	0	11.5	11	115	30	746.9	8.71	NA	NA	NA	NA	NA	NA	NA	NA	NA	10.7064	0.81353
2013-11-07	RRSM	Septic Systems	SM2	15	11.5	11	115	25	746.9	8.71	5172.82	9.377	2.043	312.09	0.108	0.096	8.42688	18.1493	34.1601	10.7064	0.81353
2013-11-07	RRSM	Septic Systems	SM3	30	11.5	11	115	25	746.9	8.71	5264.96	11.313	2.105	317.649	0.131	0.099	8.68199	18.4726	41.2109	10.7064	0.81353
2013-11-07	RRSM	Septic Systems	SM4	45	11.5	11	115	25	746.9	8.71	5260.62	10.602	2.052	317.387	0.122	0.097	8.46459	18.4573	38.6208	10.7064	0.81353
2013-11-07	RRSM	Septic Systems	SM5	60	12	11	120	25	746.9	8.71	4867.7	10.334	1.973	291.715	0.115	0.092	8.21767	17.2567	36.7891	10.5848	0.822876
2013-11-07	RRRB	Floodplain preservation	RB1	0	11	10.5	120	25	746.9	9.21	3912.63	22.794	0.69	237.852	0.255	0.033	2.81263	13.5962	79.2867	10.8305	0.850374
2013-11-07	RRRB	Floodplain preservation	RB2	15	11	10.5	115	25	746.9	9.21	3779.02	27.178	0.674	231.256	0.315	0.032	2.76874	13.2192	97.9554	10.8305	0.850374
2013-11-07	RRRB	Floodplain preservation	RB3	30	11	10.5	115	25	746.9	9.21	3651.02	24.343	0.626	223.423	0.282	0.03	2.57341	12.7714	87.7369	10.8305	0.850374
2013-11-07	RRRB	Floodplain preservation	RB4	45	11	10.5	115	25	746.9	9.21	2372.23	13.073	0.509	145.168	0.151	0.024	2.08938	8.29815	47.1159	10.8305	0.850374
2013-11-07	RRRB	Floodplain preservation	RB5	60	11	10.5	120	25	746.9	9.21	3132.7	15.521	0.561	190.439	0.173	0.027	2.28381	10.886	53.9906	10.8305	0.850374
2013-11-08	RRRM	Floodplain preservation	RM1	0	7	7	118	26	750.6	9.21	1382.88	7.139	0.346	94.433	0.085	0.019	1.36	4.66118	23.6681	11.9812	0.768701
2013-11-08	RRRM	Floodplain preservation	RM2	15	7	7	113	26	750.6	9.21	1537.71	8.017	0.333	105.674	0.099	0.018	1.31966	5.21606	27.5495	11.9812	0.768701
2013-11-08	RRRM	Floodplain preservation	RM3	30	7	7	112	25	750.6	9.21	1599.97	11.73	0.332	109.463	0.141	0.018	1.30745	5.40305	39.3072	11.9812	0.768701
2013-11-08	RRRM	Floodplain preservation	RM4	45	7	7	116	25	750.6	9.21	1590.08	28.389	0.331	108.24	0.332	0.018	1.29475	5.34271	92.4213	11.9812	0.768701
2013-11-08	RRRM	Floodplain preservation	RM5	60	8	7	119	27	750.6	9.21	1589.02	56.885	0.325	108.974	0.693	0.018	1.33567	5.5771	198.555	11.6893	0.787898
2013-11-08	DRKV	In-line SWM	KV1	0	12	9.5	119	26	755.8	7.12	8656.09	3.89989	5.05059	551.115	0.0456145	0.25133	22.1463	32.2179	14.3933	10.711	0.66474
2013-11-08	DRKV	In-line SWM	KV2	15	12	9.5	114	25	755.8	7.12	7704.52	3.86039	4.49499	490.809	0.0452921	0.223845	19.7244	28.6924	14.2915	10.711	0.66474
2013-11-08	DRKV	In-line SWM	KV3	30	12	9.5	102	27	755.8	7.12	7674.47	3.13185	4.47942	504.434	0.0430858	0.23214	20.4553	29.4889	13.5954	10.711	0.66474
2013-11-08	DRKV	In-line SWM	KV4	45	10	9.5	114.5	26	755.8	7.12	420.433	2.50864	0.372109	26.929	0.0303024	0.0186596	1.5263	1.46926	9.08634	11.2186	0.634658
2013-11-08	DRKV	In-line SWM	KV5	60	10	9.5	118	25	755.8	7.12	6983.07	3.94817	4.12561	442.535	0.0450131	0.204083	16.6933	24.145	13.4974	11.2186	0.634658
2013-11-08	DRGG	In-line SWM	GG1	0	10	10	120	25	764.5	2.11	6739.62	172.597	1.29152	423.982	1.94021	0.0633218	5.12059	22.8694	575.161	11.3478	0.18594
2013-11-08	DRGG	In-line SWM	GG2	15	10	10	117	22	764.5	2.11	6570.34	179.11	1.25633	407.385	1.85129	0.0604594	4.88911	21.9742	548.801	11.3478	0.18594
2013-11-08	DRGG	In-line SWM	GG3	30	10	10	113	25.5	764.5	2.11	5479.41	118.582	1.03218	348.938	1.42465	0.0514045	4.15688	18.8216	422.327	11.3478	0.18594
2013-11-08	DRGG	In-line SWM	GG4	45	10	10	113	26	764.5	2.11	431.546	2.31553	0.372609	27.5667	0.0282757	0.0186301	1.50654	1.48694	8.38212	11.3478	0.18594
2013-11-08	DRGG	In-line SWM	GG5	60	10	10	118	25	764.5	2.11	5589.56	84.0122	0.906083	352.513	0.957629	0.044567	3.60396	19.0144	283.882	11.3478	0.18594
2013-11-08	DRIS	Stream Burial	IS1	0	12	11.5	120	25	764.5	7.23	6796.29	20.2307	2.69136	409.55	0.225979	0.126262	10.9992	23.6696	70.4943	10.8342	0.667328
2013-11-08	DRIS	Stream Burial	IS2	15	12	11.5	117	24	764.5	7.23	7549.59	16.5309	3.18806	453.865	0.182289	0.149109	12.9894	26.2307	56.8653	10.8342	0.667328
2013-11-08	DRIS	Stream Burial	IS3	30	12	11.5	113	24	764.5	7.23	5944.54	11.0361	2.51867	359.298	0.125271	0.118616	10.3331	20.7653	39.0783	10.8342	0.667328
2013-11-08	DRIS	Stream Burial	IS4	45	12	11.5	112	23	764.5	7.23	6892.72	9.14891	2.80526	414.446	0.10098	0.131234	11.4322	23.9525	31.5009	10.8342	0.667328
2013-11-08	DRIS	Stream Burial	IS5	60	11	11.5	118	21.5	764.5	7.23	6879.63	10.0135	2.81523	406.556	0.100184	0.128793	10.8123	22.7047	30.473	11.0857	0.652189
2013-11-08	DRAL	Stream Burial	AL1	0	12	13	121	25	764.5	7.29	1190.87	1.28416	0.632696	68.7399	0.0141603	0.028392	2.47333	3.97276	4.41732	10.8342	0.672866
2013-11-08	DRAL	Stream Burial	AL2	15	12	13	123	23	764.5	7.29	1242.97	1.34999	0.652924	70.6597	0.0137051	0.0287285	2.50264	4.08372	4.27533	10.8342	0.672866
2013-11-08	DRAL	Stream Burial	AL3	30	14	13	114	24	764.5	7.29	1341.65	1.30171	0.699735	77.6771	0.0145811	0.0315225	2.953	4.80139	4.77779	10.3606	0.703625
2013-11-08	DRAL	Stream Burial	AL4	45	13	13	114.5	23	764.5	7.29	1251.83	1.22271	0.666706	71.9384	0.0131699	0.0297476	2.68787	4.30067	4.21154	10.5927	0.688209
2013-11-08	DRAL	Stream Burial	AL5	60	13	4	113	24	764.5	7.29	1520.58	3.08796	0.774594	115.439	0.0363205	0.0461115	4.16644	6.90125	11.6148	10.5927	0.688209
2013-11-22	RRSD	Septic Systems	SD1	0	13	13	121	25.5	744.999	7.29	17493.7	6.72309	7.78254	991.355	0.0750627	0.343594	31.8583	60.8172	24.6323	10.3225	0.706223
2013-11-22	RRSD	Septic Systems	SD2	15	13	13	118.5	25	744.999	7.29	13584	5.54337	6.2185	769.93	0.0619473	0.274605	25.4617	47.2333	20.3284	10.3225	0.706223
2013-11-22	RRSD	Septic Systems	SD3	30	13	13	113	25	744.999	7.29	17788.1	5.44153	7.7807	1016.36	0.0633008	0.347154	32.1884	62.3514	20.7726	10.3225	0.706223
2013-11-22	RRSD	Septic Systems	SD4	45	13	13	114	26	744.999	7.29	16934.5	5.22086	7.42336	972.746	0.0623241	0.333471	30.9198	59.6755	20.4521	10.3225	0.706223
2013-11-22	RRSD	Septic Systems	SD5	60	13	13	117	25.5	744.999	7.29	15641.5	4.42731	6.91067	891.414	0.0508529	0.307321	28.4951	54.686	16.6877	10.3225	0.706223
2013-11-22	RRSM	Septic Systems	SM1	0	10	10	124	27	744.001	9.75	4937.01	7.61424	1.86088	305.555	0.0883896	0.090035	7.48138	16.9356	26.9244	11.0435	0.882872
2013-11-22	RRSM	Septic Systems	SM2	15	10	10	120	22	744.001	9.75	4989.17	7.23656	1.81425	301.128	0.072902	0.0849954	7.06262	16.6903	22.2067	11.0435	0.882872
2013-11-22	RRSM	Septic Systems	SM3	30	9	10	114.5	26	744.001	9.75	5004.51	6.18415	1.76721	311.815	0.074362	0.0862381	6.89934	16.6846	22.0655	11.3093	0.862121
2013-11-22	RRSM	Septic Systems	SM4	45	9	10	114.5	27.5	744.001	9.75	4875.33	5.93803	1.72928	306.614	0.0748712	0.0853975	6.83209	16.4064	22.2166	11.3093	0.862121
2013-11-22	RRSM	Septic Systems	SM5	60	9	10	118	29	744.001	9.75	4505.81	5.65795	1.63345	284.498	0.0727497	0.0810724	6.48607	15.223	21.5871	11.3093	0.862121
2013-11-22	RRRB	Floodplain preservation	RB1	0	9	10	121	26	743.754	8.26	3483.46	17.6461	0.825528	215.088	0.202578	0.0398254	3.18723	11.5128	60.1311	11.3056	0.730614
2013-11-22	RRRB	Floodplain preservation	RB2	15	8.5	10	120	25	743.754	8.26	3192.16	20.8033	0.752056	196.171	0.232753	0.0360615	2.83131	10.3151	68.1765	11.4427	0.72186
2013-11-22	RRRB	Floodplain preservation	RB3	30	8.5	10	114	25	743.754	8.26	2236.28	15.7874	0.705507	138.521	0.184353	0.0341744	2.68315	7.2838	53.9994	11.4427	0.72186
2013-11-22	RRRB	Floodplain preservation	RB4	45	8.5	10	113.5	24	743.754	8.26	2892.55	14.9387	0.696923	178.16	0.169217	0.0335148	2.63136	9.36811	49.5658	11.4427	0.72186
2013-11-22	RRRB	Floodplain preservation	RB5	60	8.5	10	118	22.5	743.754	8.26	2753.41	11.9088	0.648204	167.04	0.123863	0.0305714	2.40027	8.78337	36.281	11.4427	0.72186
2013-11-22	RRRM	Floodplain preservation	RM1	0	8	9.5	122	25	743.214	10.52	1427.41	5.70038	0.387057	88.7345	0.063039	0.0187688	1.44655	4.58641	18.2323	11.5743	0.90891
2013-11-22	RRRM	Floodplain preservation	RM2	15	8	9.5	119	25	743.214	10.52	1385.13	5.86588	0.381334	86.4256	0.0662205	0.0185792	1.43193	4.46707	19.1524	11.5743	0.90891
2013-11-22	RRRM	Floodplain preservation	RM3	30	8	9.5	118	26	743.214	10.52	1426.86	6.50667	0.382371	89.6817	0.0764298	0.0188045	1.4493	4.63537	22.1052	11.5743	0.90891
2013-11-22	RRRM	Floodplain preservation	RM4	45	8	9.5	114	25	743.214	10.52	1416.06	19.8358	0.379683	88.9372	0.232078	0.0186547	1.43775	4.59688	67.1221	11.5743	0.90891
2013-11-22	RRRM	Floodplain preservation	RM5	60	8.5	9.5	117	24	743.214	10.52	1574.54	50.7786	0.364358	97.8957	0.562023	0.0176715	1.38846	5.15134	164.744	11.4344	0.920034
2013-11-22	DRKV	In-line SWM	KV1	0	11.5	12	120	26	744.766	8.14	10113.6	3.09058	6.2243	591.626	0.0354524	0.284209	24.9503	34.504	11.2106	10.6758	0.762469
2013-11-22	DRKV	In-line SWM	KV2	15	11.5	12	120	24	744.766	8.14	9712.31	3.69317	6.08486	560.932	0.03962	0.27332	23.9943	32.7139	12.5285	10.6758	0.762469
2013-11-22	DRKV	In-line SWM	KV3	30	11	12	113	25	744.766	8.14	8914.2	3.91383	5.57609	523.279	0.045694	0.255748	22.0391	29.9977	14.267	10.7996	0.753732
2013-11-22	DRKV	In-line SWM	KV4	45	11.5	12	115	26.5	744.766	8.14	8714.24	2.37341	5.47322	515.114	0.0286828	0.253274	22.2345	30.0418	9.06996	10.6758	0.762469
2013-11-22	DRKV	In-line SWM	KV5	60	12	12	118.5	25	744.766	8.14	7924.19	3.99022	4.93201	461.536	0.0447587	0.223949	20.0259	27.3808	14.3325	10.5546	0.771229
2013-11-22	DRGG	In-line SWM	GG1	0	10	12	121.5	22	744.766	1.65	9932.34	314.513	3.30083	565.255	3.10859	0.14548	12.0762	31.2976	945.935	11.0549	0.149256
2013-11-22	DRGG	In-line SWM	GG2	15	11	12	113	25	744.766	1.65	9970.02	253.901	3.41511	585.258	2.9643	0.156634	13.498	33.5507	925.539	10.7996	0.152784
2013-11-22	DRGG	In-line SWM	GG3	30	11	12	113	25	744.766	1.65	7999.28	158.729	2.18225	469.572	1.85316	0.100089	8.6252	26.9188	578.609	10.7996	0.152784
2013-11-22	DRGG	In-line SWM	GG4	45	11	12	115	28	744.766	1.65	7919.64	138.221	2.11047	472.751	1.7508	0.0988898	8.52184	27.1011	546.651	10.7996	0.152784
2013-11-22	DRGG	In-line SWM	GG5	60	11	12	120	25	744.766	1.65	7389.47	107.494	1.73598	429.523	1.19313	0.078622	6.77526	24.6229	372.529	10.7996	0.152784
2013-11-22	DRIS	Stream Burial	IS1	0	12	13.5	121	25	744.639	6.71	8022.71	25.2718	2.92976	446.869	0.276958	0.126981	11.3568	26.5153	88.7019	10.5528	0.635851
2013-11-22	DRIS	Stream Burial	IS2	15	12	13.5	120	25	744.639	6.71	9684.55	14.5652	3.63468	540.178	0.160741	0.157813	14.1143	32.0518	51.4809	10.5528	0.635851
2013-11-22	DRIS	Stream Burial	IS3	30	12	13.5	113.5	24	744.639	6.71	8558.94	10.7121	3.07312	478.585	0.119708	0.133858	11.9718	28.3972	38.3392	10.5528	0.635851
2013-11-22	DRIS	Stream Burial	IS4	45	12	13.5	114	25	744.639	6.71	9828.71	8.94249	3.39168	553.025	0.103061	0.14892	13.319	32.8141	33.0076	10.5528	0.635851
2013-11-22	DRIS	Stream Burial	IS5	60	12	13.5	119	27	744.639	6.71	8796.05	8.28049	3.01433	497.898	0.0982353	0.133372	11.9284	29.5431	31.462	10.5528	0.635851
2013-11-22	DRAL	Stream Burial	AL1	0	12	12.5	121	25	744.549	10.12	1296.16	2.00846	0.686342	74.1873	0.0220944	0.0305871	2.73595	4.40248	7.07707	10.5515	0.959105
2013-11-22	DRAL	Stream Burial	AL2	15	12	12.5	121	22.5	744.549	10.12	1399.5	1.87691	0.712516	78.8128	0.018918	0.0310971	2.78157	4.67698	6.05964	10.5515	0.959105
2013-11-22	DRAL	Stream Burial	AL3	30	12	12.5	116	25	744.549	10.12	1457.5	1.57986	0.747774	84.0008	0.0180069	0.0336218	3.0074	4.98485	5.76779	10.5515	0.959105
2013-11-22	DRAL	Stream Burial	AL4	45	12	12.5	115	26	744.549	10.12	1246.96	1.85145	0.728013	72.4543	0.021975	0.0330765	2.95862	4.29964	7.03883	10.5515	0.959105
2013-11-22	DRAL	Stream Burial	AL5	60	12	12.5	120	25	744.549	10.12	1945.28	4.22362	0.979809	111.49	0.0467868	0.0437408	3.91252	6.61613	14.9863	10.5515	0.959105
2013-12-13	RRSD	Septic Systems	SD1	0	10.8	4	121	25	750.2	8.57	15864.9	4.83033	7.81682	1180.62	0.0554156	0.455097	38.645	66.7276	17.0895	10.929	0.784155
2013-12-13	RRSD	Septic Systems	SD2	15	10.8	4	120	26	750.2	8.57	15425.9	4.75182	7.70658	1154.87	0.0566491	0.452078	38.3886	65.2722	17.4699	10.929	0.784155
2013-12-13	RRSD	Septic Systems	SD3	30	10.8	4	119	25	750.2	8.57	14447.8	4.04993	7.04941	1077.4	0.0470991	0.411406	34.935	60.8938	14.5248	10.929	0.784155
2013-12-13	RRSD	Septic Systems	SD4	45	10.8	4	100	25	750.2	8.57	13634.1	3.32956	6.82954	1040.99	0.0446676	0.410527	34.8603	58.8359	13.775	10.929	0.784155
2013-12-13	RRSD	Septic Systems	SD5	60	10.8	4	118	27	750.2	8.57	12714.1	3.45424	6.39701	958.738	0.0430691	0.378507	32.1413	54.187	13.282	10.929	0.784155
2013-12-13	RRSM	Septic Systems	SM1	0	3.5	2	120	27	750.2	13.04	3350.51	6.27106	1.72134	269.311	0.0779178	0.108024	6.89519	11.6719	19.6752	13.1026	0.995221
2013-12-13	RRSM	Septic Systems	SM2	15	3.5	2	119	24	750.2	13.04	3638.14	5.73541	1.82013	288.648	0.0652972	0.112492	7.18034	12.5099	16.4884	13.1026	0.995221
2013-12-13	RRSM	Septic Systems	SM3	30	4	2	105	25	750.2	13.04	3355.01	5.15357	1.67997	271.633	0.067056	0.106328	6.92713	11.9988	17.1809	12.9306	1.00846
2013-12-13	RRSM	Septic Systems	SM4	45	3.5	2	114	25	750.2	13.04	3360.06	5.4214	1.70175	269.225	0.0659887	0.106377	6.79001	11.6681	16.663	13.1026	0.995221
2013-12-13	RRSM	Septic Systems	SM5	60	4	2	118	26.5	750.2	13.04	3231.08	4.94577	1.62548	259.651	0.0613697	0.101925	6.64026	11.4696	15.724	12.9306	1.00846
2013-12-13	RRRB	Floodplain preservation	RB1	0	1.3	1	121	25	752.2	13.02	2857.35	12.1587	0.914761	235.84	0.142	0.0584832	3.39681	9.35978	33.4878	13.9451	0.933662
2013-12-13	RRRB	Floodplain preservation	RB2	15	1.1	1	113	25	752.2	13.02	2622.28	19.2516	0.844689	218.148	0.237367	0.0544196	3.1341	8.5896	55.6373	14.0226	0.928498
2013-12-13	RRRB	Floodplain preservation	RB3	30	2	1	113	26	752.2	13.02	2586.48	22.4101	0.832444	216.191	0.285147	0.0539058	3.22465	8.81876	68.6861	13.6792	0.951808
2013-12-13	RRRB	Floodplain preservation	RB4	45	2	1	115	25	752.2	13.02	2505.85	17.2521	0.793901	208.032	0.209759	0.0509694	3.049	8.48596	50.5266	13.6792	0.951808
2013-12-13	RRRB	Floodplain preservation	RB5	60	2	1	119.5	25.5	752.2	13.02	2235.97	15.8113	0.754108	185.228	0.189424	0.0482496	2.8863	7.55574	45.6282	13.6792	0.951808
2013-12-13	RRRM	Floodplain preservation	RM1	0	0.4	1.5	120	25	751.7	13.58	1389.85	9.61432	0.496184	112.79	0.112667	0.0307453	1.7197	4.32224	25.8627	14.2904	0.95029
2013-12-13	RRRM	Floodplain preservation	RM2	15	0.7	1.5	119	24	751.7	13.58	1624.07	17.0258	0.484146	131.316	0.194425	0.0298629	1.69193	5.09263	45.0459	14.1705	0.958327
2013-12-13	RRRM	Floodplain preservation	RM3	30	1.5	1.5	113	24	751.7	13.58	1399.94	10.2331	0.489448	113.862	0.121766	0.0303861	1.78105	4.55759	28.9104	13.859	0.979867
2013-12-13	RRRM	Floodplain preservation	RM4	45	1.5	1.5	113	27	751.7	13.58	1569.5	12.2788	0.501601	129.511	0.16064	0.0316404	1.85457	5.18396	38.14	13.859	0.979867
2013-12-13	RRRM	Floodplain preservation	RM5	60	1.5	1.5	120	22	751.7	13.58	1450.31	10.2192	0.490235	116.08	0.108353	0.0299295	1.75429	4.64636	25.7258	13.859	0.979867
2013-12-13	DRKV	In-line SWM	KV1	0	7.2	6	122	25	753.5	7.61	8595.92	2.91396	6.4921	601.52	0.0329025	0.354354	26.1138	29.7926	9.18465	11.9679	0.635867
2013-12-13	DRKV	In-line SWM	KV2	15	7.2	6	120	26	753.5	7.61	7314.38	3.30647	5.56029	515.673	0.0390627	0.306228	22.5672	25.5407	10.9042	11.9679	0.635867
2013-12-13	DRKV	In-line SWM	KV3	30	7	6	113	25	753.5	7.61	7465.79	3.05711	5.75914	527.87	0.0367454	0.318367	23.2791	25.9553	10.2013	12.0275	0.632715
2013-12-13	DRKV	In-line SWM	KV4	45	6.5	6	114	25	753.5	7.61	8153.01	2.7154	6.09727	575.755	0.0324089	0.336596	24.1334	27.7971	8.87429	12.1789	0.624853
2013-12-13	DRKV	In-line SWM	KV5	60	6.5	6	117	25	753.5	7.61	6929.78	3.67589	5.17704	487.634	0.0429298	0.284378	20.3894	23.5427	11.7551	12.1789	0.624853
2013-12-13	DRGG	In-line SWM	GG1	0	7.2	6	121	25	754.7	7.96	4118.4	41.3564	2.91609	288.905	0.469546	0.159101	11.7062	14.2864	130.864	11.987	0.664054
2013-12-13	DRGG	In-line SWM	GG2	15	7.4	6	119	26	754.7	7.96	4837.73	51.4985	3.42386	341.927	0.611958	0.188723	13.9944	17.0315	171.488	11.9278	0.66735
2013-12-13	DRGG	In-line SWM	GG3	30	7.5	6	115	25	754.7	7.96	5905.11	56.7636	3.89959	417.081	0.671743	0.214891	15.9969	20.8502	188.755	11.8984	0.668999
2013-12-13	DRGG	In-line SWM	GG4	45	7	6	113.5	27	754.7	7.96	4283.61	39.4613	3.03288	306.468	0.503071	0.169603	12.3817	15.045	139.442	12.0467	0.660762
2013-12-13	DRGG	In-line SWM	GG5	60	6.5	6	120	26	754.7	7.96	3651.87	30.7302	2.47821	257.815	0.362695	0.136143	9.74572	12.4274	99.1561	12.1983	0.652552
2013-12-13	DRIS	Stream Burial	IS1	0	7.1	7	120	25	754.8	9.94	3922.85	29.3875	1.83159	267.064	0.33426	0.096567	7.07647	13.1567	92.8924	12.0184	0.827068
2013-12-13	DRIS	Stream Burial	IS2	15	7.4	7	120	24	754.8	9.94	NA	NA	NA	NA	NA	NA	NA	NA	NA	11.9294	0.833239
2013-12-13	DRIS	Stream Burial	IS3	30	8	7	115	23	754.8	9.94	3781.66	20.7431	1.77541	256.046	0.228241	0.0929536	7.05414	13.0311	64.9991	11.7547	0.845616
2013-12-13	DRIS	Stream Burial	IS4	45	7.5	7	103	26	754.8	9.94	4246.32	15.1556	1.88285	297.434	0.202219	0.102806	7.65205	14.867	56.8144	11.8999	0.835298
2013-12-13	DRIS	Stream Burial	IS5	60	7.5	7	119	25	754.8	9.94	3990.25	18.2772	1.81372	271.964	0.209336	0.09575	7.12689	13.5939	58.8139	11.8999	0.835298
2013-12-13	DRAL	Stream Burial	AL1	0	8.6	8	120	26	754	10.07	1487.43	1.45475	1.03185	98.6785	0.017057	0.0526148	4.09049	5.13654	4.94148	11.5723	0.870184
2013-12-13	DRAL	Stream Burial	AL2	15	7.8	8	120	23.5	754	10.07	1537.78	1.79185	1.07065	100.59	0.0193269	0.0537235	4.04989	5.08808	5.48014	11.7999	0.853395
2013-12-13	DRAL	Stream Burial	AL3	30	8.5	8	115	24	754	10.07	1473.45	1.69487	0.977633	97.2274	0.019259	0.0494882	3.83268	5.04298	5.56454	11.6003	0.868081
2013-12-13	DRAL	Stream Burial	AL4	45	8.5	8	113	25	754	10.07	1465.46	1.12227	1.00932	97.52	0.0134012	0.051632	3.99871	5.05816	3.87203	11.6003	0.868081
2013-12-13	DRAL	Stream Burial	Al5	60	8	8	120	27	754	10.07	1545.77	1.55172	1.03039	103.124	0.0187691	0.0528861	4.01772	5.25389	5.35077	11.7423	0.857584
2014-01-17	RRSD	Septic Systems	SD1	0	10.4	8	120	27	724.9	5.99	13765.7	3.78909	6.24454	888.245	0.0454533	0.315242	27.2921	51.239	14.3582	10.6594	0.561948
2014-01-17	RRSD	Septic Systems	SD2	15	10	8	120	25	724.9	5.99	14390.8	4.09108	6.38487	917.881	0.0460267	0.317674	27.0924	52.2149	14.3897	10.76	0.556693
2014-01-17	RRSD	Septic Systems	SD3	30	10	8	113	25	724.9	5.99	13865	3.10632	6.12572	892.326	0.0367513	0.308213	26.2856	50.7611	11.4898	10.76	0.556693
2014-01-17	RRSD	Septic Systems	SD4	45	10	8	114	30	724.9	5.99	13765.2	3.06693	6.20354	911.631	0.0420294	0.323556	27.5941	51.8594	13.1399	10.76	0.556693
2014-01-17	RRSD	Septic Systems	SD5	60	10	8	119	28	724.9	5.99	12650.6	3.26826	5.78131	822.098	0.0407162	0.294394	25.107	46.7661	12.7294	10.76	0.556693
2014-01-17	RRSM	Septic Systems	SM1	0	5.1	5	120	25	742.5	10.15	3875.21	6.39323	1.40701	276.976	0.0732776	0.077894	5.36064	12.8847	19.5781	12.4364	0.816154
2014-01-17	RRSM	Septic Systems	SM2	15	5.2	5	108	25	742.5	10.15	3780.13	4.42371	1.383	274.081	0.055292	0.077876	5.38095	12.7978	14.8148	12.4044	0.818259
2014-01-17	RRSM	Septic Systems	SM3	30	5.5	5	113	24	742.5	10.15	3576.05	4.76947	1.28702	256.24	0.0555437	0.0713893	4.99231	12.0993	15.009	12.3093	0.824582
2014-01-17	RRSM	Septic Systems	SM4	45	5.5	5	113	30	742.5	10.15	3363.47	4.11734	1.24572	248.972	0.0577188	0.0717863	5.02007	11.7561	15.5968	12.3093	0.824582
2014-01-17	RRSM	Septic Systems	SM5	60	5.5	5	120	25	742.5	10.15	3342.97	4.7826	1.23561	238.934	0.0548304	0.0682948	4.77591	11.2821	14.8163	12.3093	0.824582
2014-01-17	RRRB	Floodplain preservation	RB1	0	2.8	5	120	27	754.4	10.76	2327.34	8.01698	0.870181	170.393	0.0981156	0.0490536	3.02505	7.14886	24.1348	13.4249	0.801498
2014-01-17	RRRB	Floodplain preservation	RB2	15	2.5	5	120	25	754.4	10.76	2281.22	14.2582	0.851254	165.321	0.163853	0.0474054	2.8872	6.85606	39.9472	13.534	0.795035
2014-01-17	RRRB	Floodplain preservation	RB3	30	3.5	5	113	22	754.4	10.76	2235.25	13.3084	0.819277	160.629	0.144842	0.0451515	2.86597	6.92286	36.3708	13.176	0.816638
2014-01-17	RRRB	Floodplain preservation	RB4	45	3.5	5	114	25	754.4	10.76	1971.93	11.2426	0.77988	143.871	0.134709	0.043688	2.77307	6.2006	33.8264	13.176	0.816638
2014-01-17	RRRB	Floodplain preservation	RB5	60	3.5	5	121	25	754.4	10.76	2039.52	11.1638	0.794191	147.648	0.127447	0.0441133	2.80007	6.36339	32.0028	13.176	0.816638
2014-01-17	RRRM	Floodplain preservation	RM1	0	3	4	115	26	744.9	11.62	1307.46	10.7262	0.434452	97.8308	0.13214	0.0245815	1.54799	4.18902	33.1142	13.1848	0.881318
2014-01-17	RRRM	Floodplain preservation	RM2	15	2.5	4	120	26	744.9	11.62	1425.91	15.4267	0.451223	106.095	0.183541	0.0254202	1.56795	4.45599	45.3178	13.3636	0.869529
2014-01-17	RRRM	Floodplain preservation	RM3	30	3	4	114	23	744.9	11.62	1480.4	16.1883	0.428861	109.165	0.18183	0.0238936	1.50467	4.67432	45.5664	13.1848	0.881318
2014-01-17	RRRM	Floodplain preservation	RM4	45	3	4	115	27	744.9	11.62	1593.62	16.5691	0.44114	119.86	0.210517	0.0251081	1.58115	5.13229	52.7553	13.1848	0.881318
2014-01-17	RRRM	Floodplain preservation	RM5	60	3	4	120	26	744.9	11.62	1725.15	17.4313	0.431565	128.359	0.207383	0.0242715	1.52847	5.49622	51.9698	13.1848	0.881318
2014-01-17	DRKV	In-line SWM	KV1	0	6.8	7	120	27	747.3	6.7	8067.57	2.12594	4.70124	550.515	0.0257701	0.250646	18.335	27.0949	7.17416	11.9882	0.558882
2014-01-17	DRKV	In-line SWM	KV2	15	6.8	7	120	24	747.3	6.7	7496.66	2.75181	4.74273	503.201	0.0302659	0.247688	18.1186	24.7662	8.42574	11.9882	0.558882
2014-01-17	DRKV	In-line SWM	KV3	30	7	7	114	24	747.3	6.7	7375.44	2.64239	4.38415	498.525	0.0303074	0.230908	17.0241	24.7158	8.48382	11.9286	0.561676
2014-01-17	DRKV	In-line SWM	KV4	45	7	7	115	28	747.3	6.7	4921.36	2.21785	2.96241	339.879	0.0287139	0.159941	11.792	16.8504	8.03775	11.9286	0.561676
2014-01-17	DRKV	In-line SWM	KV5	60	7	7	120	25	747.3	6.7	6654.82	1.85021	4.08383	449.166	0.0210558	0.214638	15.8246	22.2687	5.89407	11.9286	0.561676
2014-01-17	DRGG	In-line SWM	GG1	0	6.3	7	120	28	746.9	9.1	1417.01	13.4135	0.859264	97.1766	0.167263	0.0452789	3.24937	4.69845	45.9495	12.1331	0.750013
2014-01-17	DRGG	In-line SWM	GG2	15	6.9	7	119	27	746.9	9.1	2123.6	16.3765	1.18924	145.023	0.199492	0.0627412	4.61009	7.16761	55.7197	11.9519	0.761383
2014-01-17	DRGG	In-line SWM	GG3	30	7	7	115	25	746.9	9.1	2270.04	16.8754	1.16202	154.063	0.198418	0.0608315	4.48732	7.64216	55.5719	11.9222	0.763283
2014-01-17	DRGG	In-line SWM	GG4	45	7	7	114	27	746.9	9.1	2113.4	14.2582	1.18241	145.264	0.180025	0.0628568	4.63671	7.20573	50.4205	11.9222	0.763283
2014-01-17	DRGG	In-line SWM	GG5	60	7	7	120	25	746.9	9.1	2153.98	15.7506	1.22238	145.316	0.178832	0.0635855	4.69047	7.20829	50.0864	11.9222	0.763283
2014-01-17	DRIS	Stream Burial	IS1	0	8	8	115	28	747	8.85	5108.06	36.9302	2.18562	342.297	0.475139	0.114132	8.7518	17.6026	136.724	11.6333	0.760749
2014-01-17	DRIS	Stream Burial	IS2	15	8	8	114	25	747	8.85	4899.09	33.9963	2.11915	323.011	0.400734	0.108448	8.31595	16.6108	115.314	11.6333	0.760749
2014-01-17	DRIS	Stream Burial	IS3	30	8	8	114	23	747	8.85	4603.29	24.2283	1.96109	299.907	0.266651	0.0988305	7.57845	15.4227	76.7303	11.6333	0.760749
2014-01-17	DRIS	Stream Burial	IS4	45	8.1	8	120	25	747	8.85	5016.81	20.7313	2.13496	328.32	0.234255	0.108268	8.33425	16.9445	67.5898	11.6049	0.762609
2014-01-17	DRIS	Stream Burial	IS5	60	8.2	8	119	24	747	8.85	4876.46	20.6219	1.96784	317.688	0.226899	0.0991675	7.6632	16.4547	65.6437	11.5766	0.76447
2014-01-17	DRAL	Stream Burial	AL1	0	8.7	8	120	27	745.6	9.18	2344.7	4.51125	1.46419	154.942	0.0543562	0.0748711	5.90896	8.18519	15.9671	11.4157	0.804153
2014-01-17	DRAL	Stream Burial	AL2	15	8	8	120	21	745.6	9.18	2260.67	4.7826	1.40518	144.349	0.0469465	0.068897	5.29303	7.43705	13.5345	11.6115	0.790598
2014-01-17	DRAL	Stream Burial	AL3	30	8.3	8	114	25	745.6	9.18	2100.97	4.0692	1.34008	138.302	0.0479995	0.0681265	5.29474	7.20258	13.9501	11.5269	0.7964
2014-01-17	DRAL	Stream Burial	AL4	45	8.5	8	114	26	745.6	9.18	2207.39	3.75408	1.37462	146.171	0.0457573	0.0704066	5.51417	7.66699	13.3697	11.4711	0.800274
2014-01-17	DRAL	Stream Burial	Al5	60	8.5	8	119	25	745.6	9.18	1793.79	3.9554	1.20927	117.344	0.0450312	0.0609267	4.77171	6.15494	13.1576	11.4711	0.800274
2014-02-01	RRSD	Septic Systems	SD1	0	10	7.5	113	25	751.6	8.95	14786.1	3.53086	6.72113	996.174	0.0421144	0.353749	29.0973	54.6556	12.6988	11.1563	0.802238
2014-02-01	RRSD	Septic Systems	SD2	15	10	7.5	113	25	751.6	8.95	13388.3	2.8481	6.4679	902.001	0.0339815	0.340384	27.998	49.4887	10.2465	11.1563	0.802238
2014-02-01	RRSD	Septic Systems	SD3	30	10	7.5	105	25	751.6	8.95	13570.8	2.61613	6.2393	924.498	0.0331891	0.332937	27.3854	50.723	10.0075	11.1563	0.802238
2014-02-01	RRSD	Septic Systems	SD4	45	10	7.5	119	25	751.6	8.95	12449.4	2.67303	5.87251	832.55	0.0305637	0.30609	25.1771	45.6782	9.2159	11.1563	0.802238
2014-02-01	RRSD	Septic Systems	SD5	60	10	7.5	120	25	751.6	8.95	12229.9	2.78245	5.8748	816.921	0.031595	0.305759	25.1499	44.8208	9.52685	11.1563	0.802238
2014-02-01	RRSM	Septic Systems	SM1	0	5	4	119	25	750.6	12.38	2977.49	3.71469	1.3339	222.141	0.0432093	0.0771367	5.23018	10.1842	11.3875	12.6045	0.982186
2014-02-01	RRSM	Septic Systems	SM2	15	5	4	114	20	750.6	12.38	2842.49	3.3733	1.2818	207.678	0.0340229	0.0722591	4.89946	9.5211	8.96654	12.6045	0.982186
2014-02-01	RRSM	Septic Systems	SM3	30	5	4	113	24	750.6	12.38	3189.47	3.30328	1.25454	238.284	0.0387699	0.0726115	4.92335	10.9243	10.2176	12.6045	0.982186
2014-02-01	RRSM	Septic Systems	SM4	45	5	4	113	25	750.6	12.38	2254.12	2.68178	0.960156	169.294	0.0325463	0.055695	3.77635	7.76138	8.57739	12.6045	0.982186
2014-02-01	RRSM	Septic Systems	SM5	60	5	4	118	25	750.6	12.38	2856.81	2.94876	1.18121	213.365	0.0345457	0.0682878	4.63018	9.78181	9.10431	12.6045	0.982186
2014-02-01	RRRB	Floodplain preservation	RB1	0	0.5	2.5	119	26	752.3	12.54	2099.63	5.90304	0.919498	165.755	0.0714657	0.0561394	3.15106	6.37221	16.4427	14.2616	0.879284
2014-02-01	RRRB	Floodplain preservation	RB2	15	0.5	2.5	113	25	752.3	12.54	1888.21	7.59244	0.985445	149.296	0.0928348	0.0603435	3.38703	5.73947	21.3593	14.2616	0.879284
2014-02-01	RRRB	Floodplain preservation	RB3	30	0.5	2.5	113	26	752.3	12.54	443.742	2.50234	0.396925	35.2608	0.0316247	0.023842	1.33823	1.35555	7.27617	14.2616	0.879284
2014-02-01	RRRB	Floodplain preservation	RB4	45	0.5	2.5	113	25	752.3	12.54	1993.06	9.51382	0.876564	157.587	0.116314	0.0535687	3.00676	6.05818	26.7613	14.2616	0.879284
2014-02-01	RRRB	Floodplain preservation	RB5	60	0.5	2.5	120	25	752.3	12.54	1987.06	8.81354	0.859508	155.969	0.102681	0.0520695	2.92262	5.99598	23.6247	14.2616	0.879284
2014-02-01	RRRM	Floodplain preservation	RM1	0	NA	NA	NA	NA	NA	14.13	NA	NA	NA	NA	NA	NA	NA	NA	NA	NA	NA
2014-02-01	RRRM	Floodplain preservation	RM2	15	0.5	2	113	26	750.1	14.13	1478.15	23.3398	0.527314	119.134	0.295128	0.0324979	1.82943	4.59336	68.1018	14.2199	0.993678
2014-02-01	RRRM	Floodplain preservation	RM3	30	0.5	2	114	25	750.1	14.13	1480	21.3878	0.509262	118.571	0.260157	0.0311531	1.75373	4.57165	60.032	14.2199	0.993678
2014-02-01	RRRM	Floodplain preservation	RM4	45	0.5	2	115	25	750.1	14.13	1542.23	23.9963	0.51288	123.426	0.289838	0.0313462	1.76459	4.75884	66.8811	14.2199	0.993678
2014-02-01	RRRM	Floodplain preservation	RM5	60	0.5	2	118	24	750.1	14.13	1714.68	28.106	0.499138	136.157	0.321916	0.0302306	1.7018	5.24968	74.2832	14.2199	0.993678
2014-02-01	DRKV	In-line SWM	KV1	0	7	7.5	120	25	754.1	9.18	7370.7	1.79769	5.09926	493.749	0.0204438	0.266004	19.4348	24.2582	5.67115	12.0371	0.762641
2014-02-01	DRKV	In-line SWM	KV2	15	7	7.5	114	25	754.1	9.18	7852.75	1.82833	5.49112	529.881	0.0216881	0.289152	21.126	26.0334	6.0163	12.0371	0.762641
2014-02-01	DRKV	In-line SWM	KV3	30	7	7.5	115	22	754.1	9.18	7093.18	1.8152	5.36975	469.773	0.0192597	0.276158	20.1767	23.0803	5.34267	12.0371	0.762641
2014-02-01	DRKV	In-line SWM	KV4	45	7	7.5	115	23	754.1	9.18	6561.48	1.89835	4.85021	437.103	0.0208781	0.251202	18.3533	21.4752	5.79162	12.0371	0.762641
2014-02-01	DRKV	In-line SWM	KV5	60	7	7.5	117	25	754.1	9.18	5478.28	1.48257	4.09804	368.285	0.0172239	0.214551	15.6756	18.0941	4.77794	12.0371	0.762641
2014-02-01	DRGG	In-line SWM	GG1	0	6	6	114	26	754.3	10.66	3623.36	36.149	2.16056	257.528	0.444985	0.119569	8.39616	12.1937	120.036	12.3466	0.863394
2014-02-01	DRGG	In-line SWM	GG2	15	5.5	6	118	25	754.3	10.66	2007.66	20.7926	1.41589	141.242	0.240946	0.0770633	5.3048	6.5649	64.09	12.5049	0.852467
2014-02-01	DRGG	In-line SWM	GG3	30	5.5	6	115	20	754.3	10.66	1326.45	16.696	1.16639	91.0736	0.16522	0.0615126	4.23434	4.23307	43.9475	12.5049	0.852467
2014-02-01	DRGG	In-line SWM	GG4	45	6	6	115	25	754.3	10.66	1750.61	15.8688	1.23112	123.59	0.187814	0.0671661	4.71643	5.85183	50.6635	12.3466	0.863394
2014-02-01	DRGG	In-line SWM	GG5	60	6	6	118	25	754.3	10.66	1438.6	12.6475	1.06792	101.208	0.146582	0.057898	4.06563	4.79209	39.5409	12.3466	0.863394
2014-02-01	DRIS	Stream Burial	IS1	0	7	8	118	26	741.5	10.5	5566.16	33.0588	2.91181	364.95	0.390731	0.148601	11.0415	18.2349	110.231	11.836	0.887125
2014-02-01	DRIS	Stream Burial	IS2	15	7	8	115	22	741.5	10.5	5537.33	39.5994	3.17509	355.89	0.416748	0.158137	11.7501	17.7823	117.571	11.836	0.887125
2014-02-01	DRIS	Stream Burial	IS3	30	7	8	114	20	741.5	10.5	4898.64	40.5889	3.17257	311.375	0.398441	0.155835	11.5791	15.558	112.406	11.836	0.887125
2014-02-01	DRIS	Stream Burial	IS4	45	8	8	115	25	741.5	10.5	5930.55	27.3489	3.29855	388.062	0.319658	0.168042	12.9813	20.104	92.6658	11.5476	0.909278
2014-02-01	DRIS	Stream Burial	IS5	60	8	8	117	25	741.5	10.5	9592.04	23.388	4.50108	626.06	0.269494	0.228917	17.6838	32.4338	78.1237	11.5476	0.909278
2014-02-01	DRAL	Stream Burial	AL1	0	7.5	7	117	25	752.3	10.34	2180.77	3.76283	1.713	148.559	0.0437169	0.0903915	6.7504	7.4503	12.3233	11.8605	0.871799
2014-02-01	DRAL	Stream Burial	AL2	15	8	7	115	25	752.3	10.34	1966.07	3.66217	1.74123	134.26	0.0431566	0.0921692	7.01786	6.85564	12.3311	11.7158	0.882568
2014-02-01	DRAL	Stream Burial	AL3	30	8	7	115	25	752.3	10.34	1525.99	3.31203	1.56085	104.207	0.0390357	0.0825237	6.28344	5.3211	11.1536	11.7158	0.882568
2014-02-01	DRAL	Stream Burial	AL4	45	8	7	115	26	752.3	10.34	1996.24	3.33391	1.68122	137.093	0.0405882	0.0895745	6.82029	7.00035	11.5972	11.7158	0.882568
2014-02-01	DRAL	Stream Burial	Al5	60	8	7	114	25	752.3	10.34	2101.12	3.53962	1.77362	143.66	0.0420158	0.0940434	7.16057	7.33566	12.0051	11.7158	0.882568
2014-02-19	RRSD	Septic Systems	SD1	0	9.8	8	120	27	740	8.65	13521.5	2.47608	5.99433	887.835	0.0298228	0.307641	25.5083	49.1298	9.08605	11.0361	0.783791
2014-02-19	RRSD	Septic Systems	SD2	15	9.8	8	119	30	740	8.65	12998.4	2.75619	5.72782	869.192	0.0365277	0.300726	24.9348	48.0981	11.1288	11.0361	0.783791
2014-02-19	RRSD	Septic Systems	SD3	30	11	8	115	25	740	8.65	11959.4	2.65115	5.23208	781.207	0.0310259	0.266655	23.1271	45.0721	9.74957	10.7305	0.806115
2014-02-19	RRSD	Septic Systems	SD4	45	9	8	113	25	740	8.65	13897.7	2.88749	6.20737	910.206	0.0342833	0.317585	25.5452	48.9668	10.2279	11.2485	0.768992
2014-02-19	RRSD	Septic Systems	SD5	60	12	8	118	27	740	8.65	12478.1	2.48046	5.56235	821.444	0.0302982	0.286331	25.7691	49.0464	9.76447	10.487	0.824827
2014-02-19	RRSM	Septic Systems	SM1	0	4.3	4	120	25	739.3	11.09	3155.85	12.1836	1.41307	232.102	0.140233	0.080621	5.39523	10.5227	36.7774	12.6428	0.877181
2014-02-19	RRSM	Septic Systems	SM2	15	4.4	4	120	25	739.3	11.09	3111.42	6.50264	1.22444	228.834	0.0748702	0.0697377	4.68588	10.4138	19.6921	12.6098	0.879477
2014-02-19	RRSM	Septic Systems	SM3	30	5	4	123	26	739.3	11.09	3173.39	6.46325	1.31286	233.823	0.0752964	0.0750042	5.16332	10.8836	20.1472	12.4148	0.89329
2014-02-19	RRSM	Septic Systems	SM4	45	5	4	114	27	739.3	11.09	2993.89	8.27521	1.31564	223.996	0.105792	0.0765474	5.26955	10.4262	28.3069	12.4148	0.89329
2014-02-19	RRSM	Septic Systems	SM5	60	5	4	118	28	739.3	11.09	2968.02	9.45692	1.31608	222.12	0.121079	0.0765973	5.27299	10.3389	32.3973	12.4148	0.89329
2014-02-19	RRRB	Floodplain preservation	RB1	0	1.4	3	120	25	741.2	12.43	2483.99	9.4044	0.935116	189.242	0.108919	0.0550322	3.25756	7.65198	26.1469	13.7032	0.907087
2014-02-19	RRRB	Floodplain preservation	RB2	15	1.4	3	120	25	741.2	12.43	2583.46	14.3194	0.957147	196.82	0.165815	0.0563503	3.33559	7.95841	39.8053	13.7032	0.907087
2014-02-19	RRRB	Floodplain preservation	RB3	30	2	3	115	25	741.2	12.43	2145.58	12.0523	0.890245	164.327	0.144441	0.0526674	3.19733	6.80263	35.3093	13.4792	0.922162
2014-02-19	RRRB	Floodplain preservation	RB4	45	2	3	114	23	741.2	12.43	2576.89	12.1092	1.0173	195.563	0.136675	0.0596797	3.62303	8.09572	33.4109	13.4792	0.922162
2014-02-19	RRRB	Floodplain preservation	RB5	60	2	3	120	25	741.2	12.43	2252.08	11.4002	0.926084	171.574	0.132022	0.0544918	3.30809	7.10263	32.2733	13.4792	0.922162
2014-02-19	RRRM	Floodplain preservation	RM1	0	1.5	3	119	27	740.7	12.51	1538.18	6.76087	0.756793	118.389	0.0839064	0.0448823	2.6698	4.80917	20.2173	13.6562	0.916066
2014-02-19	RRRM	Floodplain preservation	RM2	15	1.2	3	115	25	740.7	12.51	1665.32	11.0632	0.725626	127.469	0.132574	0.0427272	2.50955	5.1172	31.6536	13.77	0.908498
2014-02-19	RRRM	Floodplain preservation	RM3	30	1.5	3	114	26	740.7	12.51	1776.03	7.24668	0.688334	136.789	0.0903128	0.0407631	2.42478	5.55659	21.761	13.6562	0.916066
2014-02-19	RRRM	Floodplain preservation	RM4	45	1.5	3	114	30	740.7	12.51	1661.56	7.94258	0.727433	130.573	0.111416	0.0441196	2.62443	5.30407	26.8459	13.6562	0.916066
2014-02-19	RRRM	Floodplain preservation	RM5	60	1.5	3	118	27	740.7	12.51	1663.49	8.66911	0.685863	128.177	0.108316	0.0406327	2.41702	5.20674	26.0989	13.6562	0.916066
2014-02-19	DRKV	In-line SWM	KV1	0	2.7	5	120	25	742.5	11.4	1880.5	7.85067	1.38296	134.406	0.0899703	0.0765472	4.77633	5.70732	22.4193	13.2487	0.860459
2014-02-19	DRKV	In-line SWM	KV2	15	3	5	120	25	742.5	11.4	1858.82	8.71288	1.41097	132.857	0.0998456	0.078116	4.93516	5.70719	25.102	13.1423	0.867427
2014-02-19	DRKV	In-line SWM	KV3	30	3.5	5	112	25	742.5	11.4	1843.29	8.84418	1.36525	132.97	0.107222	0.0763963	4.92694	5.82265	27.3557	12.9681	0.879078
2014-02-19	DRKV	In-line SWM	KV4	45	3.5	5	112	26	742.5	11.4	1796.83	6.34946	1.35484	130.334	0.0795237	0.0763072	4.92119	5.7072	20.289	12.9681	0.879078
2014-02-19	DRKV	In-line SWM	KV5	60	3.5	5	117	26	742.5	11.4	1916.15	4.50249	1.42218	138.141	0.0544143	0.0795643	5.13125	6.04907	13.8828	12.9681	0.879078
2014-02-19	DRGG	In-line SWM	GG1	0	2.5	4.5	120	25	743.2	12.56	768.764	5.37346	0.624712	55.8843	0.0617728	0.0346923	2.14476	2.35251	15.2871	13.3331	0.942019
2014-02-19	DRGG	In-line SWM	GG2	15	2.3	4.5	120	25	743.2	12.56	910.438	5.65356	0.682312	66.183	0.0649902	0.0379749	2.32821	2.76451	15.9876	13.4056	0.936925
2014-02-19	DRGG	In-line SWM	GG3	30	3.5	4.5	112	25	743.2	12.56	824.825	5.57041	0.691988	60.5068	0.0677352	0.0389205	2.50769	2.64705	17.2651	12.9804	0.967616
2014-02-19	DRGG	In-line SWM	GG4	45	3.5	4.5	113	28	743.2	12.56	812.116	4.71695	0.63742	60.4644	0.062541	0.0363656	2.34308	2.64519	15.9411	12.9804	0.967616
2014-02-19	DRGG	In-line SWM	GG5	60	3.5	4.5	120	24	743.2	12.56	946.634	5.71046	0.675315	68.4625	0.0635196	0.0373616	2.40725	2.99509	16.1906	12.9804	0.967616
2014-02-19	DRIS	Stream Burial	IS1	0	3.2	5	120	25	742.8	12.64	678.199	4.21801	0.593878	48.4904	0.0483675	0.0323643	2.06081	2.09825	12.227	13.0774	0.96655
2014-02-19	DRIS	Stream Burial	IS2	15	3.2	5	119	25	742.8	12.64	696.123	3.94227	0.563147	49.8263	0.0455174	0.0306789	1.95349	2.15605	11.5065	13.0774	0.96655
2014-02-19	DRIS	Stream Burial	IS3	30	4	5	115	25	742.8	12.64	1040.44	3.88538	0.59259	74.8108	0.0461292	0.0324921	2.1379	3.33754	11.9368	12.803	0.987268
2014-02-19	DRIS	Stream Burial	IS4	45	4	5	115	22	742.8	12.64	1025.48	4.0692	0.62656	72.5422	0.0435687	0.0337939	2.22356	3.23633	11.2743	12.803	0.987268
2014-02-19	DRIS	Stream Burial	IS5	60	4	5	120	25	742.8	12.64	778.377	4.34493	0.630007	55.653	0.0498214	0.0343885	2.26269	2.48285	12.8922	12.803	0.987268
2014-02-19	DRAL	Stream Burial	AL1	0	4.5	7	120	25	742.8	12.33	848.624	1.38628	0.717923	56.9803	0.0157722	0.0368014	2.47113	2.5906	4.14069	12.6364	0.975749
2014-02-19	DRAL	Stream Burial	AL2	15	3.5	7	120	25	742.8	12.33	880.229	1.3819	0.73443	59.1025	0.0157226	0.0376683	2.42832	2.587	4.0097	12.9734	0.950409
2014-02-19	DRAL	Stream Burial	AL3	30	5	7	120	25	742.8	12.33	886.513	1.7014	0.747865	59.5243	0.0193455	0.0383738	2.62922	2.75758	5.15192	12.4735	0.988492
2014-02-19	DRAL	Stream Burial	AL4	45	5	7	115	25	742.8	12.33	806.047	1.29875	0.671972	54.4471	0.0153065	0.0346204	2.37205	2.52237	4.0763	12.4735	0.988492
2014-02-19	DRAL	Stream Burial	Al5	60	5	7	118	26	742.8	12.33	822.961	2.08218	0.719127	55.6978	0.0247809	0.0371976	2.54863	2.58031	6.59944	12.4735	0.988492
2014-03-05	RRSD	Septic Systems	SD1	0	9	3	122	25	750.1	9.83	12099.8	2.81354	5.52981	929.695	0.032271	0.332456	26.3814	49.3418	9.49796	11.402	0.862128
2014-03-05	RRSD	Septic Systems	SD2	15	8.8	3	120	28	750.1	9.83	8848.33	1.81574	4.05597	691.079	0.023153	0.248623	19.5788	36.4183	6.77835	11.457	0.857992
2014-03-05	RRSD	Septic Systems	SD3	30	10	3	112	25	750.1	9.83	11319.9	2.46385	5.06637	879.011	0.0302814	0.308572	25.4321	48.3238	9.14904	11.134	0.882879
2014-03-05	RRSD	Septic Systems	SD4	45	9	3	118	27	750.1	9.83	6045.06	1.9836	2.96334	470.918	0.0248869	0.180794	14.3465	24.9931	7.32468	11.402	0.862128
2014-03-05	RRSD	Septic Systems	SD5	60	11	3	113	26	750.1	9.83	10108.6	2.00691	4.65393	788.044	0.0252931	0.284768	24.3654	44.8544	7.84108	10.8769	0.903747
2014-03-05	RRSM	Septic Systems	SM1	0	3.8	3	120	25	749.9	12.83	3564.82	5.07026	1.29317	274.384	0.0588829	0.0772211	4.99195	12.0334	15.0054	12.9937	0.9874
2014-03-05	RRSM	Septic Systems	SM2	15	4	3	113	26	749.9	12.83	3363.75	3.55957	1.21831	262.171	0.0448133	0.0737847	4.8089	11.5855	11.4865	12.9254	0.99262
2014-03-05	RRSM	Septic Systems	SM3	30	4	3	113	29	749.9	12.83	3521.21	3.66681	1.27618	278.612	0.0505094	0.0787314	5.1313	12.3121	12.9465	12.9254	0.99262
2014-03-05	RRSM	Septic Systems	SM4	45	4	3	120	25	749.9	12.83	3162.69	4.04914	1.20043	243.432	0.047035	0.0716179	4.66768	10.7574	12.056	12.9254	0.99262
2014-03-05	RRSM	Septic Systems	SM5	60	5.5	3	115	NA	749.9	12.83	NA	NA	NA	NA	NA	NA	NA	NA	NA	12.4319	1.03202
2014-03-05	RRRB	Floodplain preservation	RB1	0	0.3	2	120	27	751.9	13.28	2446.61	9.37172	1.01677	197.047	0.116465	0.0635257	3.53707	7.51894	26.6448	14.3345	0.926436
2014-03-05	RRRB	Floodplain preservation	RB2	15	1	2	114	27	751.9	13.28	2509.92	11.243	1.03779	203.471	0.145649	0.0653551	3.74943	7.98323	34.0484	14.0561	0.944787
2014-03-05	RRRB	Floodplain preservation	RB3	30	1	2	113	27	751.9	13.28	2576.27	12.4087	1.06593	209.09	0.161903	0.0672458	3.8579	8.20371	37.8482	14.0561	0.944787
2014-03-05	RRRB	Floodplain preservation	RB4	45	1	2	120	26	751.9	13.28	2434.63	12.2568	1.00641	195.177	0.147745	0.0625306	3.58739	7.65782	34.5383	14.0561	0.944787
2014-03-05	RRRB	Floodplain preservation	RB5	60	1	2	114	25	751.9	13.28	2566.43	10.8143	0.995929	206.045	0.131632	0.0619751	3.55552	8.08422	30.7717	14.0561	0.944787
2014-03-05	RRRM	Floodplain preservation	RM1	0	0.5	2	115	28	752.1	14.8	1714.25	10.3945	0.558545	139.508	0.137745	0.0348365	1.95586	5.3646	31.7006	14.2578	1.03803
2014-03-05	RRRM	Floodplain preservation	RM2	15	0.5	2	120	25	752.1	14.8	1746.32	14.1326	0.552817	139.381	0.165102	0.0337568	1.89524	5.35972	37.9965	14.2578	1.03803
2014-03-05	RRRM	Floodplain preservation	RM3	30	0.5	2	115	25	752.1	14.8	1760.09	14.1638	0.548505	141.191	0.17119	0.0336679	1.89025	5.42931	39.3977	14.2578	1.03803
2014-03-05	RRRM	Floodplain preservation	RM4	45	1	2	117	26	752.1	14.8	1924.1	15.7047	0.538813	154.762	0.193191	0.0331509	1.90137	6.07051	45.1504	14.0598	1.05264
2014-03-05	RRRM	Floodplain preservation	RM5	60	1	2	118	27	752.1	14.8	2264.24	16.5934	0.538203	182.786	0.209	0.0332414	1.90656	7.16975	48.845	14.0598	1.05264
2014-03-05	DRKV	In-line SWM	KV1	0	5.5	5	120	24	755.1	9.19	6998.26	2.97674	5.32811	504.976	0.033148	0.299784	20.6143	23.4463	8.80781	12.5181	0.734134
2014-03-05	DRKV	In-line SWM	KV2	15	6	5	120	27	755.1	9.19	6806.05	2.75759	5.25894	498.694	0.033792	0.301635	21.1585	23.5876	9.10586	12.3597	0.743544
2014-03-05	DRKV	In-line SWM	KV3	30	5	5	120	25	755.1	9.19	6525.92	2.92079	5.19613	473.318	0.0336134	0.294231	19.8312	21.5702	8.80583	12.6801	0.724758
2014-03-05	DRKV	In-line SWM	KV4	45	5	5	118	28	755.1	9.19	6706.23	2.73894	5.19138	495.055	0.0350678	0.300538	20.2563	22.5608	9.18683	12.6801	0.724758
2014-03-05	DRKV	In-line SWM	KV5	60	5	5	116	26	755.1	9.19	5588.14	2.4452	4.60682	409.241	0.0298762	0.263936	17.7893	18.65	7.82676	12.6801	0.724758
2014-03-05	DRGG	In-line SWM	GG1	0	5	4	120	28	755.1	12.01	2737.61	10.4034	1.51899	208.153	0.131847	0.0898882	6.05846	9.48604	34.5405	12.6801	0.947153
2014-03-05	DRGG	In-line SWM	GG2	15	4.5	4	120	23	755.1	12.01	1991.74	11.3279	1.14396	147.74	0.122501	0.0655	4.32654	6.60759	31.6363	12.8457	0.934944
2014-03-05	DRGG	In-line SWM	GG3	30	5	4	115	25	755.1	12.01	1861.99	11.0912	1.11009	140.252	0.132671	0.064697	4.36057	6.3916	34.7563	12.6801	0.947153
2014-03-05	DRGG	In-line SWM	GG4	45	5	4	119	24	755.1	12.01	1838.66	11.8459	1.11767	137.207	0.133393	0.0644309	4.34264	6.25283	34.9454	12.6801	0.947153
2014-03-05	DRGG	In-line SWM	GG5	60	5	4	118	27	755.1	12.01	1891.21	14.9008	1.15851	143.416	0.185814	0.0681002	4.58995	6.5358	48.6784	12.6801	0.947153
2014-03-05	DRIS	Stream Burial	IS1	0	4.8	6	120	25	754.6	11.81	1931.44	16.7765	1.64126	135.623	0.19179	0.0892628	5.97201	6.13855	49.9912	12.7375	0.927187
2014-03-05	DRIS	Stream Burial	IS2	15	4.9	6	119	24	754.6	11.81	2027.65	18.036	1.63479	141.777	0.200832	0.0884514	5.94162	6.4412	52.4976	12.7045	0.929592
2014-03-05	DRIS	Stream Burial	IS3	30	5	6	115	25	754.6	11.81	2124.72	17.3839	1.78286	150.053	0.205756	0.0977232	6.5909	6.84279	53.9382	12.6717	0.931998
2014-03-05	DRIS	Stream Burial	IS4	45	5	6	118	23	754.6	11.81	2321.52	17.5938	1.82982	161.624	0.1906	0.0985855	6.64906	7.37048	49.9653	12.6717	0.931998
2014-03-05	DRIS	Stream Burial	IS5	60	5	6	114	25	754.6	11.81	2462.59	16.8837	1.85774	174.124	0.201273	0.102017	6.88047	7.94048	52.7631	12.6717	0.931998
2014-03-05	DRAL	Stream Burial	AL1	0	5.8	5	120	25	755.1	12.33	1877.94	2.93011	1.63645	136.205	0.0337206	0.0920416	6.40527	6.39485	9.03587	12.4227	0.99254
2014-03-05	DRAL	Stream Burial	AL2	15	6	5	115	25	755.1	12.33	2050.41	3.19122	1.75277	149.542	0.038012	0.0993171	6.9667	7.07314	10.243	12.3597	0.997595
2014-03-05	DRAL	Stream Burial	AL3	30	6	5	115	25	755.1	12.33	2091.76	3.03735	1.79123	152.558	0.0361819	0.101517	7.12103	7.2158	9.74986	12.3597	0.997595
2014-03-05	DRAL	Stream Burial	AL4	45	6	5	118	25	755.1	12.33	2093.83	3.13993	1.82043	152.193	0.0366267	0.102763	7.20844	7.19855	9.86972	12.3597	0.997595
2014-03-05	DRAL	Stream Burial	Al5	60	6	5	114	25	755.1	12.33	2231.7	3.4057	1.94048	162.954	0.0408532	0.110212	7.73091	7.70753	11.0086	12.3597	0.997595
2014-03-27	RRSD	Septic Systems	SD1	0	10.8	11	120	25	751.1	8.95	15418.3	2.76874	6.49943	928.389	0.030899	0.305016	25.8697	52.4088	9.51744	10.9421	0.817943
2014-03-27	RRSD	Septic Systems	SD2	15	10.8	11	120	26	751.1	8.95	16581.9	2.55082	11.7352	1004.61	0.0294148	0.555091	47.0796	56.7119	9.0603	10.9421	0.817943
2014-03-27	RRSD	Septic Systems	SD3	30	10.8	11	118	21	751.1	8.95	15330.3	2.12511	6.50546	902.331	0.0208383	0.29649	25.1466	50.9378	6.41859	10.9421	0.817943
2014-03-27	RRSD	Septic Systems	SD4	45	10.8	11	118	22	751.1	8.95	14517.3	2.02375	6.25469	859.966	0.0206092	0.287425	24.3777	48.5463	6.348	10.9421	0.817943
2014-03-27	RRSD	Septic Systems	SD5	60	10.8	11	120	25	751.1	8.95	14827.7	1.97813	6.36702	892.829	0.0220758	0.298803	25.3427	50.4015	6.79975	10.9421	0.817943
2014-03-27	RRSM	Septic Systems	SM1	0	9.3	8	120	25	751	10.69	4335.48	5.01895	1.49532	285.034	0.0567531	0.076795	6.15653	15.2708	16.816	11.334	0.943178
2014-03-27	RRSM	Septic Systems	SM2	15	9.3	8	118	26	751	10.69	4170.17	3.98	1.40392	276.398	0.0471357	0.0728525	5.84046	14.8081	13.9664	11.334	0.943178
2014-03-27	RRSM	Septic Systems	SM3	30	9.3	8	119	26	751	10.69	3827.24	4.18779	1.38113	253.353	0.0492508	0.0715557	5.7365	13.5734	14.5931	11.334	0.943178
2014-03-27	RRSM	Septic Systems	SM4	45	9.3	8	120	27	751	10.69	3884.8	4.15738	1.35504	258.291	0.0501005	0.0705977	5.65969	13.838	14.8448	11.334	0.943178
2014-03-27	RRSM	Septic Systems	SM5	60	9.3	8	118	25	751	10.69	3439.91	3.80769	1.21242	226.697	0.043656	0.0624573	5.00709	12.1453	12.9353	11.334	0.943178
2014-03-27	RRRB	Floodplain preservation	RB1	0	5.1	7	124	26	755.4	11.94	2326.39	6.78769	1.19667	158.626	0.0776104	0.0637949	4.31537	7.25319	20.3817	12.6524	0.943691
2014-03-27	RRRB	Floodplain preservation	RB2	15	5.1	7	118	25	755.4	11.94	2049.06	4.83833	1.01592	139.917	0.0557932	0.0542581	3.67026	6.39768	14.6522	12.6524	0.943691
2014-03-27	RRRB	Floodplain preservation	RB3	30	5.1	7	118	26	755.4	11.94	2468.53	6.85512	1.11758	169.492	0.0816405	0.0601095	4.06607	7.75002	21.44	12.6524	0.943691
2014-03-27	RRRB	Floodplain preservation	RB4	45	5.1	7	118	25	755.4	11.94	2253.64	5.96732	1.05716	153.886	0.0688123	0.0564606	3.81924	7.03643	18.0711	12.6524	0.943691
2014-03-27	RRRB	Floodplain preservation	RB5	60	5.1	7	120	25	755.4	11.94	2527.37	6.73709	1.17684	172.179	0.0766281	0.0626667	4.23905	7.87287	20.1237	12.6524	0.943691
2014-03-27	RRRM	Floodplain preservation	RM1	0	7.3	8	120	27	753.2	11.48	1141.65	5.05442	0.671115	76.0947	0.0609406	0.0350479	2.59395	3.7841	17.0647	11.9335	0.961994
2014-03-27	RRRM	Floodplain preservation	RM2	15	7.3	8	119	26	753.2	11.48	1036.04	3.89385	0.63773	68.7542	0.0458168	0.0331192	2.45121	3.41906	12.8297	11.9335	0.961994
2014-03-27	RRRM	Floodplain preservation	RM3	30	7.3	8	117	26	753.2	11.48	1099.87	3.69113	0.675053	73.1733	0.0440463	0.0351699	2.60298	3.63881	12.3339	11.9335	0.961994
2014-03-27	RRRM	Floodplain preservation	RM4	45	7.3	8	119	29	753.2	11.48	1055.28	3.77728	0.620288	71.2178	0.0486916	0.0329107	2.43578	3.54157	13.6347	11.9335	0.961994
2014-03-27	RRRM	Floodplain preservation	RM5	60	7.3	8	118	26	753.2	11.48	1215.63	5.91599	0.629576	80.7728	0.0700988	0.0327477	2.42371	4.01673	19.6292	11.9335	0.961994
2014-04-04	DRKV	In-line SWM	KV1	0	10	10	118	30	745.2	7.04	4614.49	NA	2.24531	293.491	NA	0.112429	9.32713	16.2408	NA	11.0613	0.636454
2014-04-04	DRKV	In-line SWM	KV2	15	10	10	117	25	745.2	7.04	7507.39	3.05255	4.4826	463.907	0.0348912	0.216348	17.9483	25.6711	10.6111	11.0613	0.636454
2014-04-04	DRKV	In-line SWM	KV3	30	10	10	120	25	745.2	7.04	7386.4	3.01708	4.45664	454.671	0.0337671	0.214034	17.7563	25.16	10.2692	11.0613	0.636454
2014-04-04	DRKV	In-line SWM	KV4	45	10	10	120	30	745.2	7.04	6568.54	2.95626	4.199	416.532	0.0385791	0.209462	17.3771	23.0495	11.7327	11.0613	0.636454
2014-04-04	DRKV	In-line SWM	KV5	60	10	10	120	26	745.2	7.04	7461.1	2.73834	4.45722	462.042	0.031665	0.215718	17.896	25.5679	9.62996	11.0613	0.636454
2014-04-04	DRGG	In-line SWM	GG1	0	8	10	124	26	745.9	10.9	2041.26	14.5785	1.32854	125.873	0.164062	0.0639323	4.90964	6.48253	47.2794	11.6161	0.938349
2014-04-04	DRGG	In-line SWM	GG2	15	8	10	117	26	745.9	10.9	1269.42	7.03602	0.854819	78.9877	0.0831172	0.0416138	3.19571	4.06793	23.9527	11.6161	0.938349
2014-04-04	DRGG	In-line SWM	GG3	30	8	10	118	25	745.9	10.9	2207.59	11.9356	1.38344	136.344	0.135484	0.0667088	5.12286	7.02184	39.0437	11.6161	0.938349
2014-04-04	DRGG	In-line SWM	GG4	45	8	10	119	24	745.9	10.9	2072.08	10.745	1.31742	127.035	0.11709	0.0629271	4.83244	6.54237	33.7429	11.6161	0.938349
2014-04-04	DRGG	In-line SWM	GG5	60	8	10	113	25	745.9	10.9	1576.95	7.41449	1.03202	98.0544	0.0872629	0.0501948	3.85468	5.04987	25.1475	11.6161	0.938349
2014-04-04	DRIS	Stream Burial	IS1	0	10.5	10	120	25	745.1	10.83	4724.99	42.6494	2.01786	290.814	0.47732	0.0968989	8.19223	16.3778	147.071	10.9308	0.990778
2014-04-04	DRIS	Stream Burial	IS2	15	NA	NA	NA	NA	NA	10.83	NA	NA	NA	NA	NA	NA	NA	NA	NA	NA	NA
2014-04-04	DRIS	Stream Burial	IS3	30	10.5	10	116	25	745.1	10.83	4367.14	26.5407	1.99312	270.189	0.305538	0.0963494	8.14577	15.2163	94.1417	10.9308	0.990778
2014-04-04	DRIS	Stream Burial	IS4	45	10.5	10	119	28	745.1	10.83	6634.66	22.4609	2.52739	416.328	0.27838	0.124405	10.5177	23.4464	85.7736	10.9308	0.990778
2014-04-04	DRIS	Stream Burial	IS5	60	10.5	10	110	30	745.1	10.83	5830.71	23.7028	2.38039	375.612	0.333337	0.121143	10.2419	21.1534	102.707	10.9308	0.990778
2014-04-04	DRAL	Stream Burial	AL1	0	10	10	120	28	743.5	10.69	2659.6	5.89065	1.61347	166.36	0.0724693	0.0791444	6.58087	9.22686	22.0898	11.0361	0.968643
2014-04-04	DRAL	Stream Burial	AL2	15	10	10	119	28	743.5	10.69	2575.86	5.96667	1.55122	161.347	0.0739262	0.0762263	6.33823	8.94882	22.5339	11.0361	0.968643
2014-04-04	DRAL	Stream Burial	AL3	30	10	10	113	25	743.5	10.69	2363.08	5.29769	1.50904	146.538	0.0623174	0.0732078	6.08724	8.12746	18.9953	11.0361	0.968643
2014-04-04	DRAL	Stream Burial	AL4	45	10	10	119	26	743.5	10.69	2052.27	5.13551	1.48081	127.013	0.0597795	0.0716567	5.95827	7.04452	18.2217	11.0361	0.968643
2014-04-04	DRAL	Stream Burial	Al5	60	10	10	120	26	743.5	10.69	2200.08	6.15419	1.51803	135.982	0.0711377	0.0733343	6.09776	7.54199	21.6839	11.0361	0.968643
2014-04-23	RRSD	Septic Systems	SD1	0	11.1	11.8	120	25	759.5	9.01	12928.5	3.26497	4.72028	768.262	0.0363857	0.21839	18.5234	43.3364	11.1687	10.9878	0.820001
2014-04-23	RRSD	Septic Systems	SD2	15	11	11.8	120	26	759.5	9.01	12074.4	2.56958	4.43097	721.998	0.0295909	0.206651	17.4627	40.5865	9.0599	11.0132	0.818106
2014-04-23	RRSD	Septic Systems	SD3	30	11	11.8	120	25	759.5	9.01	13000.3	3.68532	4.7202	772.531	0.0410701	0.218386	18.4543	43.4272	12.5745	11.0132	0.818106
2014-04-23	RRSD	Septic Systems	SD4	45	11	11.8	120	27	759.5	9.01	13278.4	2.73045	4.85946	798.922	0.0324581	0.228441	19.304	44.9108	9.93776	11.0132	0.818106
2014-04-23	RRSD	Septic Systems	SD5	60	11	11.8	114	25	759.5	9.01	12725.4	2.92247	4.67482	762.414	0.0339976	0.218572	18.4701	42.8585	10.4091	11.0132	0.818106
2014-04-23	RRSM	Septic Systems	SM1	0	NA	NA	NA	NA	NA	10.46	NA	NA	NA	NA	NA	NA	NA	NA	NA	NA	NA
2014-04-23	RRSM	Septic Systems	SM2	15	10.4	11.8	120	27	739.3	10.46	4472.68	8.23654	1.48797	66.7021	0.0841253	0.0202847	1.72194	3.7728	26.0566	10.8711	0.962184
2014-04-23	RRSM	Septic Systems	SM3	30	10.4	11.8	120	26	739.3	10.46	4378.02	8.26561	1.45779	63.6636	0.0813507	0.0193316	1.64104	3.60094	25.1972	10.8711	0.962184
2014-04-23	RRSM	Septic Systems	SM4	45	10.4	11.8	120	26	739.3	10.46	4223.21	8.01854	1.46953	61.4124	0.0789191	0.0194872	1.65424	3.47361	24.4441	10.8711	0.962184
2014-04-23	RRSM	Septic Systems	SM5	60	10.3	11.8	120	27	739.3	10.46	4324.02	8.48845	1.43775	64.4851	0.0866982	0.0196001	1.6576	3.63473	26.7844	10.8711	0.962184
2014-04-23	RRRB	Floodplain preservation	RB1	0	10.9	11.4	120	24	741.9	8.86	3405.56	22.1059	1.56595	199.388	0.237581	0.0713481	6.14925	11.4348	74.2764	10.783	0.821664
2014-04-23	RRRB	Floodplain preservation	RB2	15	10.9	11.4	119	23	741.9	8.86	3477.18	25.6665	1.60591	202.539	0.268154	0.0726875	6.26469	11.615	83.8346	10.783	0.821664
2014-04-23	RRRB	Floodplain preservation	RB3	30	10.9	11.4	119	25	741.9	8.86	3417.8	24.0485	1.58368	201.642	0.269272	0.0728681	6.28026	11.564	84.1843	10.783	0.821664
2014-04-23	RRRB	Floodplain preservation	RB4	45	10.9	11.4	118	20	741.9	8.86	3073.71	23.1475	1.45498	175.778	0.217284	0.0643125	5.54287	10.081	67.9309	10.783	0.821664
2014-04-23	RRRB	Floodplain preservation	RB5	60	10.9	11.4	120	24	741.9	8.86	2867.75	18.5841	1.35606	167.9	0.19973	0.061785	5.32504	9.629	62.4429	10.783	0.821664
2014-04-23	RRRM	Floodplain preservation	RM1	0	11	10.8	120	27	741.8	10.76	1645.23	21.8637	0.47445	99.8094	0.25994	0.0225261	1.94895	5.745	81.4852	10.7566	1.00032
2014-04-23	RRRM	Floodplain preservation	RM2	15	11	10.8	120	25	741.8	10.76	1560.38	25.0125	0.422793	93.5027	0.278787	0.0197593	1.70957	5.382	87.3934	10.7566	1.00032
2014-04-23	RRRM	Floodplain preservation	RM3	30	11	10.8	119	25	741.8	10.76	1508.69	22.4547	0.416206	90.5231	0.252031	0.019484	1.68575	5.21	79.0059	10.7566	1.00032
2014-04-23	RRRM	Floodplain preservation	RM4	45	11	10.8	118	24	741.8	10.76	1751.46	24.1502	0.41645	104.566	0.263853	0.0193711	1.67598	6.018	82.7117	10.7566	1.00032
2014-04-23	RRRM	Floodplain preservation	RM5	60	11	10.8	119	25	741.8	10.76	2203.93	30.9275	0.430473	132.238	0.347129	0.0201519	1.74353	7.611	108.817	10.7566	1.00032
2014-04-23	DRKV	In-line SWM	KV1	0	11.6	11.2	120	26	743.9	7.18	9379.01	7.38393	4.5264	560.483	0.0849486	0.211251	18.6358	32.838	26.9613	10.639	0.674875
2014-04-23	DRKV	In-line SWM	KV2	15	11.5	11.2	119	25	743.9	7.18	7799.76	7.71755	3.80697	463.818	0.0865213	0.176558	15.5178	27.082	27.3913	10.6634	0.67333
2014-04-23	DRKV	In-line SWM	KV3	30	11.5	11.2	120	25	743.9	7.18	7224.02	6.60181	3.60646	429.017	0.0734974	0.166977	14.6757	25.05	23.2681	10.6634	0.67333
2014-04-23	DRKV	In-line SWM	KV4	45	11.5	11.2	117	26	743.9	7.18	7560.11	6.77306	3.78869	453.66	0.0795987	0.177761	15.6235	26.489	25.1997	10.6634	0.67333
2014-04-23	DRKV	In-line SWM	KV5	60	11.5	11.2	119	27	743.9	7.18	7792.55	6.3112	3.86106	469.23	0.0754846	0.18196	15.9926	27.398	23.8972	10.6634	0.67333
2014-04-23	DRGG	In-line SWM	GG1	0	11.8	11	120	26	749.9	10.2	975.164	15.3335	0.722864	59.001	0.176773	0.034149	3.01051	3.453	55.9369	10.6759	0.955425
2014-04-23	DRGG	In-line SWM	GG2	15	10.5	11	119	25	749.9	10.2	1411.89	30.5981	0.306692	85.0102	0.343769	0.0143985	1.20951	4.757	105.243	11.0012	0.92717
2014-04-23	DRGG	In-line SWM	GG3	30	10.6	11	119	27	749.9	10.2	1857.01	21.4665	1.09729	113.203	0.257264	0.0523376	4.41299	6.356	78.9628	10.9756	0.929336
2014-04-23	DRGG	In-line SWM	GG4	45	10.6	11	118	25	749.9	10.2	337.42	1.66661	0.359564	20.3429	0.0188567	0.0169093	1.42575	1.142	5.78774	10.9756	0.929336
2014-04-23	DRGG	In-line SWM	GG5	60	10.7	11	120	27	749.9	10.2	1831.7	17.247	1.02762	111.505	0.205242	0.0489277	4.14093	6.283	63.1575	10.95	0.931504
2014-04-23	DRIS	Stream Burial	IS1	0	12	13.5	120	25	745.5	10.45	6881.44	71.1695	2.48544	384.198	0.785568	0.108012	9.64913	22.77	251.304	10.565	0.989116
2014-04-23	DRIS	Stream Burial	IS2	15	12.7	13.5	120	25	745.5	10.45	6464.31	48.7353	2.3774	360.909	0.537939	0.103317	9.46928	21.904	175.11	10.3991	1.00489
2014-04-23	DRIS	Stream Burial	IS3	30	13.2	13.5	120	25	745.5	10.45	6367.43	42.3602	2.38762	355.5	0.46757	0.103761	9.68438	21.941	154.087	10.2835	1.01619
2014-04-23	DRIS	Stream Burial	IS4	45	13.1	13.5	118	28	745.5	10.45	6862.1	33.7711	2.50943	391.978	0.416368	0.112295	10.4429	24.112	136.878	10.3064	1.01393
2014-04-23	DRIS	Stream Burial	IS5	60	13.2	13.5	114	26	745.5	10.45	7015.23	41.0522	2.5526	397.841	0.489263	0.113177	10.5632	24.554	161.236	10.2835	1.01619
2014-04-23	DRAL	Stream Burial	AL1	0	12	13	120	25	753.8	10.96	2610.15	4.20946	1.40666	149.092	0.0466336	0.0625295	5.52449	8.739	14.7539	10.6826	1.02597
2014-04-23	DRAL	Stream Burial	AL2	15	12.1	13	118	25	753.8	10.96	2108.41	3.94998	1.33938	120.765	0.0443811	0.0597496	5.29831	7.103	14.0764	10.6584	1.0283
2014-04-23	DRAL	Stream Burial	AL3	30	12.1	13	117	25	753.8	10.96	2000.68	3.53482	1.32807	114.756	0.0400019	0.0593523	5.26308	6.749	12.6874	10.6584	1.0283
2014-04-23	DRAL	Stream Burial	AL4	45	12.1	13	108	20	753.8	10.96	1809.26	3.58672	1.26677	101.478	0.0360325	0.0550033	4.87743	5.968	11.4285	10.6584	1.0283
2014-04-23	DRAL	Stream Burial	Al5	60	12.5	13	120	25	753.8	10.96	1757.41	4.83739	1.20721	100.383	0.05359	0.0536633	4.82884	5.985	17.1673	10.5623	1.03765
2014-05-08	RRSD	Septic Systems	SD1	0	12.1	13.3	120	26	748.8	9.34	NA	NA	NA	NA	NA	NA	NA	NA	NA	10.5877	0.882159
2014-05-08	RRSD	Septic Systems	SD2	15	12.1	13.3	123	26	748.8	9.34	NA	NA	NA	NA	NA	NA	NA	NA	NA	10.5877	0.882159
2014-05-08	RRSD	Septic Systems	SD3	30	12.1	13.3	118	25	748.8	9.34	NA	NA	NA	NA	NA	NA	NA	NA	NA	10.5877	0.882159
2014-05-08	RRSD	Septic Systems	SD4	45	12.1	13.3	120	27	748.8	9.34	NA	NA	NA	NA	NA	NA	NA	NA	NA	10.5877	0.882159
2014-05-08	RRSD	Septic Systems	SD5	60	12.1	13.3	119	25	748.8	9.34	NA	NA	NA	NA	NA	NA	NA	NA	NA	10.5877	0.882159
2014-05-08	RRSM	Septic Systems	SM1	0	11.9	13.2	119	25	748.4	10.43	NA	NA	NA	NA	NA	NA	NA	NA	NA	10.6303	0.981162
2014-05-08	RRSM	Septic Systems	SM2	15	11.9	13.2	119	25	748.4	10.43	NA	NA	NA	NA	NA	NA	NA	NA	NA	10.6303	0.981162
2014-05-08	RRSM	Septic Systems	SM3	30	13.1	13.2	119	26	748.4	10.43	NA	NA	NA	NA	NA	NA	NA	NA	NA	10.3465	1.00807
2014-05-08	RRSM	Septic Systems	SM4	45	11.9	13.2	119	27	748.4	10.43	NA	NA	NA	NA	NA	NA	NA	NA	NA	10.6303	0.981162
2014-05-08	RRSM	Septic Systems	SM5	60	11.9	13.2	115	27	748.4	10.43	NA	NA	NA	NA	NA	NA	NA	NA	NA	10.6303	0.981162
2014-05-08	RRRB	Floodplain preservation	RB1	0	12.8	13.8	120	27	750.3	9.98	NA	NA	NA	NA	NA	NA	NA	NA	NA	10.4426	0.955699
2014-05-08	RRRB	Floodplain preservation	RB2	15	12.8	13.8	121	28	750.3	9.98	NA	NA	NA	NA	NA	NA	NA	NA	NA	10.4426	0.955699
2014-05-08	RRRB	Floodplain preservation	RB3	30	12.9	13.8	119	26	750.3	9.98	NA	NA	NA	NA	NA	NA	NA	NA	NA	10.4192	0.957843
2014-05-08	RRRB	Floodplain preservation	RB4	45	12.9	13.8	121	27	750.3	9.98	NA	NA	NA	NA	NA	NA	NA	NA	NA	10.4192	0.957843
2014-05-08	RRRB	Floodplain preservation	RB5	60	12.9	13.8	120	25	750.3	9.98	NA	NA	NA	NA	NA	NA	NA	NA	NA	10.4192	0.957843
2014-05-08	RRRM	Floodplain preservation	RM1	0	13.9	15.4	121	27	750.5	11.01	NA	NA	NA	NA	NA	NA	NA	NA	NA	10.1933	1.08012
2014-05-08	RRRM	Floodplain preservation	RM2	15	13.9	15.4	121	26	750.5	11.01	NA	NA	NA	NA	NA	NA	NA	NA	NA	10.1933	1.08012
2014-05-08	RRRM	Floodplain preservation	RM3	30	13.9	15.4	120	25	750.5	11.01	NA	NA	NA	NA	NA	NA	NA	NA	NA	10.1933	1.08012
2014-05-08	RRRM	Floodplain preservation	RM4	45	13.9	15.4	118	25	750.5	11.01	NA	NA	NA	NA	NA	NA	NA	NA	NA	10.1933	1.08012
2014-05-08	RRRM	Floodplain preservation	RM5	60	13.9	15.4	120	25	750.5	11.01	NA	NA	NA	NA	NA	NA	NA	NA	NA	10.1933	1.08012
2014-05-08	DRKV	In-line SWM	KV1	0	14.2	15.7	121	27	750.5	6.64	NA	NA	NA	NA	NA	NA	NA	NA	NA	10.1264	0.655712
2014-05-08	DRKV	In-line SWM	KV2	15	14.2	15.7	121	26	750.5	6.64	NA	NA	NA	NA	NA	NA	NA	NA	NA	10.1264	0.655712
2014-05-08	DRKV	In-line SWM	KV3	30	14.2	15.7	120	25	750.5	6.64	NA	NA	NA	NA	NA	NA	NA	NA	NA	10.1264	0.655712
2014-05-08	DRKV	In-line SWM	KV4	45	14.1	15.7	118	25	750.5	6.64	NA	NA	NA	NA	NA	NA	NA	NA	NA	10.1486	0.654277
2014-05-08	DRKV	In-line SWM	KV5	60	14	15.7	120	25	750.5	6.64	NA	NA	NA	NA	NA	NA	NA	NA	NA	10.1709	0.652843
2014-05-08	DRGG	In-line SWM	GG1	0	12.5	14.8	116	25	753.9	10.18	NA	NA	NA	NA	NA	NA	NA	NA	NA	10.5637	0.963674
2014-05-08	DRGG	In-line SWM	GG2	15	12.1	14.8	119	26	753.9	10.18	NA	NA	NA	NA	NA	NA	NA	NA	NA	10.6598	0.954992
2014-05-08	DRGG	In-line SWM	GG3	30	12.1	14.8	115	25	753.9	10.18	NA	NA	NA	NA	NA	NA	NA	NA	NA	10.6598	0.954992
2014-05-08	DRGG	In-line SWM	GG4	45	12.1	14.8	119	27	753.9	10.18	NA	NA	NA	NA	NA	NA	NA	NA	NA	10.6598	0.954992
2014-05-08	DRGG	In-line SWM	GG5	60	12.3	14.8	120	25	753.9	10.18	NA	NA	NA	NA	NA	NA	NA	NA	NA	10.6116	0.959331
2014-05-08	DRIS	Stream Burial	IS1	0	15.1	18.5	115	25	753.4	9.58	NA	NA	NA	NA	NA	NA	NA	NA	NA	9.96877	0.961002
2014-05-08	DRIS	Stream Burial	IS2	15	15.8	18.5	113	29	753.4	9.58	NA	NA	NA	NA	NA	NA	NA	NA	NA	9.8204	0.97552
2014-05-08	DRIS	Stream Burial	IS3	30	16.2	18.5	120	23	753.4	9.58	NA	NA	NA	NA	NA	NA	NA	NA	NA	9.73739	0.983836
2014-05-08	DRIS	Stream Burial	IS4	45	16.4	18.5	120	28	753.4	9.58	NA	NA	NA	NA	NA	NA	NA	NA	NA	9.69636	0.988
2014-05-08	DRIS	Stream Burial	IS5	60	16.6	18.5	120	26	753.4	9.58	NA	NA	NA	NA	NA	NA	NA	NA	NA	9.65563	0.992167
2014-05-08	DRAL	Stream Burial	AL1	0	13.3	16.6	119	28	756.2	10.54	NA	NA	NA	NA	NA	NA	NA	NA	NA	10.4079	1.01269
2014-05-08	DRAL	Stream Burial	AL2	15	13.3	16.6	120	26	756.2	10.54	NA	NA	NA	NA	NA	NA	NA	NA	NA	10.4079	1.01269
2014-05-08	DRAL	Stream Burial	AL3	30	13.4	16.6	112	25	756.2	10.54	NA	NA	NA	NA	NA	NA	NA	NA	NA	10.3848	1.01495
2014-05-08	DRAL	Stream Burial	AL4	45	13.6	16.6	120	27	756.2	10.54	NA	NA	NA	NA	NA	NA	NA	NA	NA	10.3389	1.01945
2014-05-08	DRAL	Stream Burial	Al5	60	13.6	16.6	98	30	756.2	10.54	NA	NA	NA	NA	NA	NA	NA	NA	NA	10.3389	1.01945
2014-05-30	RRSD	Septic Systems	SD1	0	14	15.1	120	25	748.5	8.1	16417.8	4.27635	7.66931	881.432	0.0469617	0.320125	30.6301	55.6478	15.7169	10.1438	0.798518
2014-05-30	RRSD	Septic Systems	SD2	15	14	15.1	121	26	748.5	8.1	NA	NA	NA	NA	NA	NA	NA	NA	NA	10.1438	0.798518
2014-05-30	RRSD	Septic Systems	SD3	30	14.2	15.1	119	25	748.5	8.1	16027.1	4.02188	7.29946	861.707	0.0444812	0.305257	29.4177	54.7642	14.9586	10.0994	0.802027
2014-05-30	RRSD	Septic Systems	SD4	45	13.9	15.1	119	28	748.5	8.1	16377.2	3.64472	7.26906	898.943	0.0444071	0.312157	29.7605	56.5654	14.8261	10.1661	0.796765
2014-05-30	RRSD	Septic Systems	SD5	60	13.9	15.1	118	27	748.5	8.1	15075.6	3.63563	6.93213	823.14	0.0432458	0.295685	28.1902	51.7955	14.4383	10.1661	0.796765
2014-05-30	RRSM	Septic Systems	SM1	0	15	16.8	115	26	748.5	9.14	6395.36	8.63413	2.36553	333.758	0.101114	0.0963034	9.54946	21.7772	34.6593	9.92531	0.920878
2014-05-30	RRSM	Septic Systems	SM2	15	15	16.8	111	29	748.5	9.14	5631.6	6.91192	2.11558	302.733	0.0917863	0.089446	8.86948	19.7528	31.4621	9.92531	0.920878
2014-05-30	RRSM	Septic Systems	SM3	30	15.2	16.8	115	26	748.5	9.14	5826.8	6.75742	2.12318	304.087	0.0791357	0.0864372	8.63215	19.9713	27.2545	9.88263	0.924855
2014-05-30	RRSM	Septic Systems	SM4	45	15.2	16.8	117	25	748.5	9.14	5776.54	8.09338	2.13331	298.266	0.0903017	0.085669	8.55543	19.5891	31.1	9.88263	0.924855
2014-05-30	RRSM	Septic Systems	SM5	60	15	16.8	114	27	748.5	9.14	NA	NA	NA	NA	NA	NA	NA	NA	NA	9.92531	0.920878
2014-05-30	RRRB	Floodplain preservation	RB1	0	15	18	119	26	751.3	7.78	4952.28	41.3522	1.82848	250.032	0.468795	0.0718244	7.09557	16.2534	160.093	9.96244	0.780933
2014-05-30	RRRB	Floodplain preservation	RB2	15	17.1	18	129	25	751.3	7.78	3922.05	29.4733	1.47889	193.699	0.30168	0.056464	6.00492	13.4751	108.18	9.52853	0.816496
2014-05-30	RRRB	Floodplain preservation	RB3	30	17.1	18	111	27	751.3	7.78	4307.76	35.3563	1.72884	222.246	0.439851	0.0698188	7.4252	15.4611	157.727	9.52853	0.816496
2014-05-30	RRRB	Floodplain preservation	RB4	45	17	18	119	26	751.3	7.78	3894.28	34.7023	1.58444	196.615	0.393407	0.0622384	6.59607	13.6344	140.75	9.54842	0.814795
2014-05-30	RRRB	Floodplain preservation	RB5	60	17	18	102	25	751.3	7.78	3909.35	28.5055	1.50422	202.015	0.356981	0.0608722	6.45128	14.0089	127.718	9.54842	0.814795
2014-05-30	RRRM	Floodplain preservation	RM1	0	15.8	17	101	26	751.2	8.84	2566.73	24.8247	0.437724	137.264	0.325383	0.0183903	1.86916	9.15961	113.244	9.79172	0.902803
2014-05-30	RRRM	Floodplain preservation	RM2	15	15.8	17	112	22	751.2	8.84	1782.26	24.593	0.419146	90.4643	0.255453	0.0164697	1.67395	6.03669	88.9062	9.79172	0.902803
2014-05-30	RRRM	Floodplain preservation	RM3	30	15.8	17	109	22	751.2	8.84	3747.26	38.974	0.413236	191.107	0.414227	0.0163371	1.66047	12.7526	144.165	9.79172	0.902803
2014-05-30	RRRM	Floodplain preservation	RM4	45	15.8	17	120	26	751.2	8.84	2692.91	43.8357	0.405636	139.117	0.49489	0.0163049	1.6572	9.2833	172.239	9.79172	0.902803
2014-05-30	RRRM	Floodplain preservation	RM5	60	15.8	17	112	25	751.2	8.84	3191.07	54.8214	0.411547	165.784	0.634922	0.0166627	1.69356	11.0628	220.974	9.79172	0.902803
2014-05-30	DRKV	In-line SWM	KV1	0	15.3	16.1	109	25	753.5	9.33	9149.45	51.6611	4.88189	489.884	0.614405	0.204058	20.3151	32.0649	210.694	9.92729	0.939834
2014-05-30	DRKV	In-line SWM	KV2	15	NA	NA	NA	NA	NA	9.33	NA	NA	NA	NA	NA	NA	NA	NA	NA	NA	NA
2014-05-30	DRKV	In-line SWM	KV3	30	15.3	16.1	112	27	753.5	9.33	8718.69	51.6611	4.71301	471.375	0.641389	0.199461	19.8574	30.8533	219.948	9.92729	0.939834
2014-05-30	DRKV	In-line SWM	KV4	45	15.3	16.1	114	30	753.5	9.33	7993.43	38.3337	4.2528	440.036	0.513679	0.184172	18.3354	28.8021	176.153	9.92729	0.939834
2014-05-30	DRKV	In-line SWM	KV5	60	15.3	16.1	114	27	753.5	9.33	8814.2	40.5198	4.47573	474.876	0.495426	0.188574	18.7736	31.0825	169.893	9.92729	0.939834
2014-05-30	DRGG	In-line SWM	GG1	0	14.7	14.1	111	29	754.5	14.1	4457.23	38.9511	1.63257	257.856	0.521742	0.0743029	7.23171	16.5274	176.158	10.07	1.40019
2014-05-30	DRGG	In-line SWM	GG2	15	14.4	14.1	125	26	754.5	14.1	2816.2	29.1235	1.56502	156.232	0.320934	0.0675114	6.50073	9.91534	107.584	10.136	1.39108
2014-05-30	DRGG	In-line SWM	GG3	30	14.1	14.1	113	22	754.5	14.1	2666.68	29.6324	1.53378	146.354	0.308955	0.0652533	6.21616	9.1968	102.825	10.2027	1.38199
2014-05-30	DRGG	In-line SWM	GG4	45	14.2	14.1	120	27	754.5	14.1	2764.97	26.2243	1.51013	155.486	0.308865	0.0662884	6.33745	9.80302	103.043	10.1804	1.38502
2014-05-30	DRGG	In-line SWM	GG5	60	14.2	14.1	114	30	754.5	14.1	3238.51	26.2425	1.64946	187.625	0.353732	0.075211	7.19048	11.8293	118.011	10.1804	1.38502
2014-05-30	DRIS	Stream Burial	IS1	0	15.9	16.3	111	27	754.2	7.06	7201.54	37.5013	2.732	388.404	0.469006	0.115384	11.7219	25.8989	162.961	9.80994	0.719679
2014-05-30	DRIS	Stream Burial	IS2	15	15.7	16.3	123	25	754.2	7.06	6901.37	29.9096	2.66192	359.908	0.320724	0.107677	10.8622	23.8437	110.919	9.8518	0.71662
2014-05-30	DRIS	Stream Burial	IS3	30	15.6	16.3	120	26	754.2	7.06	7235.99	30.9931	2.76325	381.687	0.350882	0.113429	11.4022	25.2046	121.065	9.87286	0.715092
2014-05-30	DRIS	Stream Burial	IS4	45	15.5	16.3	121	27	754.2	7.06	8619.99	31.08	3.07653	457.179	0.360838	0.127177	12.7391	30.0917	124.209	9.89399	0.713564
2014-05-30	DRIS	Stream Burial	IS5	60	15.5	16.3	114	24	754.2	7.06	8244.94	29.6415	2.77929	432.65	0.327464	0.113326	11.3518	28.4772	112.72	9.89399	0.713564
2014-05-30	DRAL	Stream Burial	AL1	0	14.7	15.2	112	29	753.2	9.43	3254.26	2.23605	1.80652	182.505	0.0296157	0.0796478	7.7653	11.7179	10.0165	10.0527	0.938057
2014-05-30	DRAL	Stream Burial	AL2	15	14.7	15.2	119	27	753.2	9.43	3035.86	2.02702	1.70688	165.919	0.0239513	0.0728162	7.09925	10.6531	8.10075	10.0527	0.938057
2014-05-30	DRAL	Stream Burial	AL3	30	14.7	15.2	118	25	753.2	9.43	2755.39	1.98158	1.59457	148.744	0.0220867	0.0669567	6.52797	9.55032	7.47008	10.0527	0.938057
2014-05-30	DRAL	Stream Burial	AL4	45	14.7	15.2	115	26	753.2	9.43	2903	1.93614	1.54138	158.554	0.0228081	0.0657005	6.40549	10.1801	7.71408	10.0527	0.938057
2014-05-30	DRAL	Stream Burial	Al5	60	14.7	15.2	112	26	753.2	9.43	3420.02	4.28089	1.59373	187.715	0.0515858	0.0683624	6.66502	12.0525	17.4472	10.0527	0.938057
2014-06-19	RRSD	Septic Systems	SD1	0	14.6	17.1	115	22	746.7	8.52	22150.1	8.33693	10.9911	1110.83	0.0845821	0.426241	41.7691	71.7072	28.7874	9.98761	0.853057
2014-06-19	RRSD	Septic Systems	SD2	15	14.6	17.1	114	20	746.7	8.52	20781.3	7.69809	10.3559	1027.48	0.0726545	0.39428	38.6372	66.3267	24.7278	9.98761	0.853057
2014-06-19	RRSD	Septic Systems	SD3	30	14.6	17.1	115	28	746.7	8.52	21125.9	6.64625	10.205	1108.62	0.082892	0.419499	41.1085	71.5643	28.2121	9.98761	0.853057
2014-06-19	RRSD	Septic Systems	SD4	45	14.6	17.1	115	21	746.7	8.52	22223.2	6.93938	10.6381	1105.88	0.0677125	0.408426	40.0233	71.3875	23.0458	9.98761	0.853057
2014-06-19	RRSD	Septic Systems	SD5	60	14.6	17.1	114	21	746.7	8.52	22804.2	7.23827	10.4041	1136.42	0.071146	0.400186	39.2159	73.3589	24.2144	9.98761	0.853057
2014-06-19	RRSM	Septic Systems	SM1	0	17.1	19.7	114	20	746.7	8.77	NA	NA	NA	NA	NA	NA	NA	NA	NA	9.47019	0.926064
2014-06-19	RRSM	Septic Systems	SM2	15	17.1	19.7	114	27	746.7	8.77	8029.17	19.3377	3.10171	393.885	0.233801	0.118887	12.7214	27.5703	84.3553	9.47019	0.926064
2014-06-19	RRSM	Septic Systems	SM3	30	17.1	19.7	119	23	746.7	8.77	7671.52	20.4355	3.13249	361.437	0.207375	0.113981	12.1965	25.2991	74.8211	9.47019	0.926064
2014-06-19	RRSM	Septic Systems	SM4	45	17.1	19.7	119	23	746.7	8.77	7549.3	19.3098	3.08529	355.679	0.195952	0.112264	12.0128	24.896	70.6995	9.47019	0.926064
2014-06-19	RRSM	Septic Systems	SM5	60	17.1	19.7	114	26	746.7	8.77	7471.86	18.4516	2.89852	363.623	0.21587	0.109965	11.7668	25.4521	77.886	9.47019	0.926064
2014-06-19	RRRB	Floodplain preservation	RB1	0	23.2	23.4	114	21	749.8	6.76	5129.39	65.057	1.17349	220.525	0.62734	0.0387431	5.07087	18.5367	257.204	8.42553	0.802323
2014-06-19	RRRB	Floodplain preservation	RB2	15	23.1	23.4	115	21	749.8	6.76	5496.74	62.9226	1.15604	235.926	0.602264	0.0380845	4.96836	19.7726	246.417	8.4415	0.800806
2014-06-19	RRRB	Floodplain preservation	RB3	30	22.7	23.4	113	25	749.8	6.76	5337.98	55.1931	1.1386	238.307	0.623356	0.0394711	5.08201	19.7365	252.953	8.5059	0.794743
2014-06-19	RRRB	Floodplain preservation	RB4	45	23.1	23.4	118	27	749.8	6.76	5408.45	46.4717	1.10679	243.28	0.540552	0.0387422	5.05415	20.3889	221.168	8.4415	0.800806
2014-06-19	RRRB	Floodplain preservation	RB5	60	23	23.4	114	25	749.8	6.76	5394.02	53.2928	1.21556	240.342	0.597282	0.042034	5.46563	20.0831	243.877	8.45751	0.799289
2014-06-19	RRRM	Floodplain preservation	RM1	0	22.1	22.7	115	20	740.9	7.2	2487.05	31.765	0.499278	106.441	0.291778	0.0163768	2.09204	8.76293	118.338	8.50203	0.846857
2014-06-19	RRRM	Floodplain preservation	RM2	15	22.1	22.7	115	23	740.9	7.2	2406.14	32.2666	0.497226	105.777	0.33392	0.0168879	2.15733	8.70826	135.43	8.50203	0.846857
2014-06-19	RRRM	Floodplain preservation	RM3	30	22.1	22.7	118	20	740.9	7.2	3580.44	32.4282	0.494147	152.53	0.291476	0.0161111	2.0581	12.5573	118.216	8.50203	0.846857
2014-06-19	RRRM	Floodplain preservation	RM4	45	22.1	22.7	118	22	740.9	7.2	1890.74	24.7266	0.471571	81.9763	0.240939	0.0157314	2.0096	6.74884	97.7193	8.50203	0.846857
2014-06-19	RRRM	Floodplain preservation	RM5	60	22.1	22.7	120	25	740.9	7.2	3570.13	36.3291	0.551614	158.274	0.389462	0.0189401	2.41949	13.0302	157.957	8.50203	0.846857
2014-06-19	DRKV	In-line SWM	KV1	0	NA	NA	NA	NA	NA	NA	NA	NA	NA	NA	NA	NA	NA	NA	NA	NA	NA
2014-06-19	DRKV	In-line SWM	KV2	15	21.6	22.9	114	20	751.4	NA	8473.06	90.4968	3.86827	365.733	0.838755	0.127908	15.8463	29.2461	331.924	8.70615	NA
2014-06-19	DRKV	In-line SWM	KV3	30	21.6	22.9	119	27	751.4	NA	8466.4	85.1079	4.08069	384.87	0.984076	0.144295	17.8764	30.7764	389.433	8.70615	NA
2014-06-19	DRKV	In-line SWM	KV4	45	21.6	22.9	119	25	751.4	NA	8185.06	79.5017	3.79849	365.947	0.85967	0.131469	16.2875	29.2632	340.202	8.70615	NA
2014-06-19	DRKV	In-line SWM	KV5	60	21.6	22.9	114	25	751.4	NA	6250.96	57.6284	3.06168	282.044	0.646828	0.107226	13.284	22.5538	255.972	8.70615	NA
2014-06-19	DRGG	In-line SWM	GG1	0	17.5	17.7	114	23	752.3	NA	3574.48	42.5317	1.71942	179.326	0.450954	0.0668335	7.19732	12.6181	162.969	9.46229	NA
2014-06-19	DRGG	In-line SWM	GG2	15	16.1	17.7	115	21	752.3	NA	NA	NA	NA	NA	NA	NA	NA	NA	NA	9.74378	NA
2014-06-19	DRGG	In-line SWM	GG3	30	16.2	17.7	118	24	752.3	NA	3535.08	46.5162	1.82512	177.607	0.496594	0.0710751	7.31545	11.9884	174.193	9.72317	NA
2014-06-19	DRGG	In-line SWM	GG4	45	16.2	17.7	120	21	752.3	NA	3155.4	44.1757	1.74405	154.537	0.415682	0.0657101	6.76326	10.4312	145.811	9.72317	NA
2014-06-19	DRGG	In-line SWM	GG5	60	16.3	17.7	114	26	752.3	NA	3319.19	39.383	1.73789	170.413	0.463785	0.0695909	7.18782	11.5399	163.062	9.70265	NA
2014-06-19	DRIS	Stream Burial	IS1	0	20.6	22	115	20	752.3	NA	8278.74	50.25	3.92163	364.652	0.463663	0.132358	15.8401	28.2549	179.413	8.88848	NA
2014-06-19	DRIS	Stream Burial	IS2	15	20.5	22	114	23	752.3	NA	9464.75	40.7317	3.84159	428.642	0.426404	0.134425	16.0337	33.1119	164.642	8.90601	NA
2014-06-19	DRIS	Stream Burial	IS3	30	20.6	22	120	20	752.3	NA	8177.57	32.7458	3.63225	357.553	0.291568	0.121417	14.5308	27.7049	112.821	8.88848	NA
2014-06-19	DRIS	Stream Burial	IS4	45	20.1	22	119	20	752.3	NA	10835.5	39.7509	4.77953	474.443	0.356424	0.160066	18.8369	36.2039	136.439	8.97674	NA
2014-06-19	DRIS	Stream Burial	IS5	60	20.5	22	112	25	752.3	NA	NA	NA	NA	NA	NA	NA	NA	NA	NA	8.90601	NA
2014-06-19	DRAL	Stream Burial	AL1	0	21.1	22	115	24	752.3	NA	3727.83	2.14573	2.02933	169.981	0.023127	0.0716388	8.71815	13.3727	9.04497	8.80177	NA
2014-06-19	DRAL	Stream Burial	AL2	15	20.6	22	115	21	752.3	NA	3596.84	1.53647	1.64143	159.824	0.0147729	0.0560358	6.70619	12.3839	5.71634	8.88848	NA
2014-06-19	DRAL	Stream Burial	AL3	30	20.8	22	119	25	752.3	NA	3441.95	1.26632	1.81383	157.158	0.013727	0.0641436	7.72812	12.2518	5.3344	8.85361	NA
2014-06-19	DRAL	Stream Burial	AL4	45	20.9	22	120	25	752.3	NA	3655.88	1.9733	1.83846	166.641	0.0212366	0.064871	7.84196	13.0306	8.27033	8.83627	NA
2014-06-19	DRAL	Stream Burial	Al5	60	20.9	22	117	21	752.3	NA	3744.86	6.66924	1.8087	165.88	0.0631955	0.0614944	7.43377	12.9711	24.6107	8.83627	NA
2014-07-16	DRAL	Stream Burial	AL1	0	18.5	20	119	19	747.2	NA	2926.18	1.72291	1.25316	132.566	0.0148871	0.0434073	4.87115	9.69209	5.53972	9.20721	NA
2014-07-16	DRAL	Stream Burial	AL2	15	18.5	20	115	24	747.2	NA	3173.28	1.26134	1.24449	150.699	0.0136566	0.045828	5.1428	11.0178	5.08185	9.20721	NA
2014-07-16	DRAL	Stream Burial	AL3	30	19	20	115	25	747.2	NA	2709.13	NA	1.12172	129.707	NA	0.041742	4.76492	9.63221	NA	9.11435	NA
2014-07-16	DRAL	Stream Burial	AL4	45	19	20	119	20	747.2	NA	2775.44	1.28513	1.12213	126.777	0.0115859	0.0392891	4.48492	9.41465	4.35935	9.11435	NA
2014-07-16	DRAL	Stream Burial	Al5	60	18.5	20	115	22	747.2	NA	3110.14	3.67864	1.16296	145.288	0.0369761	0.0419239	4.70469	10.6223	13.7594	9.20721	NA
2014-07-16	DRGG	In-line SWM	GG1	0	19	19.5	117	17	748.9	NA	8334.1	96.2924	2.78979	377.67	0.772182	0.0962769	10.9652	27.9826	289.883	9.13509	NA
2014-07-16	DRGG	In-line SWM	GG2	15	19	19.5	115	24	748.9	NA	6769.65	74.0812	2.32547	325.913	0.803493	0.0868272	9.88896	24.1478	301.638	9.13509	NA
2014-07-16	DRGG	In-line SWM	GG3	30	19	19.5	115	24	748.9	NA	6115.64	62.4099	2.07467	294.426	0.676904	0.0774627	8.82242	21.8149	254.115	9.13509	NA
2014-07-16	DRGG	In-line SWM	GG4	45	19.5	19.5	115	21	748.9	NA	NA	NA	NA	NA	NA	NA	NA	NA	NA	9.04369	NA
2014-07-16	DRGG	In-line SWM	GG5	60	19.5	19.5	110	22	748.9	NA	6198.27	42.8032	1.84065	296.001	0.447651	0.0680113	7.87867	22.2743	169.907	9.04369	NA
2014-07-16	DRIS	Stream Burial	IS1	0	19.5	20.5	119	19	748.6	NA	7307.22	31.2347	2.69752	327.52	0.269501	0.0923904	10.7071	24.656	102.331	9.04007	NA
2014-07-16	DRIS	Stream Burial	IS2	15	19.5	20.5	120	25	748.6	NA	6265.4	18.1587	2.28165	294.422	0.196087	0.0830985	9.63028	22.1643	74.4553	9.04007	NA
2014-07-16	DRIS	Stream Burial	IS3	30	19.5	20.5	115	20	748.6	NA	5891.18	13.8808	2.20954	267.794	0.128587	0.077081	8.93292	20.1598	48.8252	9.04007	NA
2014-07-16	DRIS	Stream Burial	IS4	45	20	20.5	118	25	748.6	NA	7197.5	18.3062	2.41286	339.356	0.200562	0.0882572	10.4025	25.9438	76.988	8.95034	NA
2014-07-16	DRIS	Stream Burial	IS5	60	20	20.5	121	20	748.6	NA	5796.45	16.0649	2.12863	261.259	0.142642	0.0734396	8.65601	19.9733	54.7549	8.95034	NA
2014-07-16	DRKV	In-line SWM	KV1	0	18	19.5	118	18	748.3	NA	10670.6	61.8674	4.74426	486.665	0.51603	0.165152	18.1913	34.9749	189.61	9.31549	NA
2014-07-16	DRKV	In-line SWM	KV2	NA	NA	NA	NA	NA	NA	NA	NA	NA	NA	NA	NA	NA	NA	NA	NA	NA	NA
2014-07-16	DRKV	In-line SWM	KV3	30	18	19.5	118	20	748.3	NA	10390.3	55.2789	4.68627	481.735	0.502855	0.166675	18.3591	34.6206	184.769	9.31549	NA
2014-07-16	DRKV	In-line SWM	KV4	45	18	19.5	120	20	748.3	NA	9987.97	44.9355	4.50124	461.823	0.403104	0.159528	17.5718	33.1896	148.116	9.31549	NA
2014-07-16	DRKV	In-line SWM	KV5	60	18.5	19.5	115	22	748.3	NA	9174.1	40.2501	4.06873	434.27	0.405293	0.148669	16.6591	31.7035	150.594	9.22077	NA
2014-07-16	RRRB	Floodplain preservation	RB1	0	20.5	22	116	25	746.2	NA	4441	61.7318	0.884098	202.544	0.683395	0.0312927	3.76298	15.7741	266.027	8.83379	NA
2014-07-16	RRRB	Floodplain preservation	RB2	15	20.5	22	115	25	746.2	NA	4632.67	57.8881	0.931036	211.673	0.645682	0.0330319	3.97212	16.4851	251.347	8.83379	NA
2014-07-16	RRRB	Floodplain preservation	RB3	30	20	22	115	24	746.2	NA	4393.77	63.6116	0.945848	199.053	0.684855	0.0331906	3.92462	15.2666	263.735	8.92165	NA
2014-07-16	RRRB	Floodplain preservation	RB4	45	20.5	22	118	24	746.2	NA	3925.81	53.3243	0.889286	176.924	0.561484	0.0309954	3.72723	13.7789	218.571	8.83379	NA
2014-07-16	RRRB	Floodplain preservation	RB5	60	20.5	22	114	29	746.2	NA	4212.18	49.3544	1.01844	199.408	0.631914	0.037813	4.54705	15.5299	245.987	8.83379	NA
2014-07-16	RRRM	Floodplain preservation	RM1	0	NA	NA	NA	NA	NA	NA	NA	NA	NA	NA	NA	NA	NA	NA	NA	NA	NA
2014-07-16	RRRM	Floodplain preservation	RM2	15	20.5	20.5	115	25	745.8	NA	1689.44	58.0424	0.358111	79.8336	0.64989	0.0131508	1.58225	6.22078	253.12	8.82906	NA
2014-07-16	RRRM	Floodplain preservation	RM3	30	20.5	20.5	120	25	745.8	NA	1573.86	49.4432	0.346025	73.7364	0.533635	0.0125672	1.51203	5.74567	207.841	8.82906	NA
2014-07-16	RRRM	Floodplain preservation	RM4	45	20.5	20.5	120	26	745.8	NA	1755.09	66.5809	0.338131	82.8794	0.743341	0.0124062	1.49266	6.45811	289.518	8.82906	NA
2014-07-16	RRRM	Floodplain preservation	RM5	60	20.5	20.5	112	21	745.8	NA	2000.2	110.69	0.328528	91.8526	1.09183	0.0116265	1.39885	7.15732	425.249	8.82906	NA
2014-07-16	RRSD	Septic Systems	SD1	0	14	15.5	120	20	743.1	NA	18093.2	5.83423	7.57405	921.983	0.0530712	0.296981	28.6221	58.631	17.8907	10.0706	NA
2014-07-16	RRSD	Septic Systems	SD2	15	14	15.5	114	26	743.1	NA	17018.3	4.54468	7.11087	913.807	0.0537846	0.29829	28.7482	58.111	18.1312	10.0706	NA
2014-07-16	RRSD	Septic Systems	SD3	30	13.9	15.5	114	21	743.1	NA	16423.1	5.09191	6.94399	849.729	0.0503021	0.277708	26.6687	53.8571	16.9163	10.0928	NA
2014-07-16	RRSD	Septic Systems	SD4	45	14	15.5	115	25	743.1	NA	16423.2	4.12118	6.95158	874.034	0.0468101	0.288297	27.7852	55.5818	15.78	10.0706	NA
2014-07-16	RRSD	Septic Systems	SD5	60	14	15.5	115	25	743.1	NA	15792.2	4.71599	6.70285	840.455	0.0535662	0.277982	26.791	53.4464	18.0575	10.0706	NA
2014-07-16	RRSM	Septic Systems	SM1	0	16	18	115	20	743.7	NA	5168.67	11.7347	1.5509	248.553	0.109518	0.0573748	5.93185	16.862	38.6805	9.65284	NA
2014-07-16	RRSM	Septic Systems	SM2	15	16	18	115	25	743.7	NA	4888.37	9.1033	1.4626	244.551	0.102609	0.0569437	5.88728	16.5905	36.2402	9.65284	NA
2014-07-16	RRSM	Septic Systems	SM3	30	16	18	120	25	743.7	NA	4984.38	9.36025	1.43796	247.341	0.101725	0.0554036	5.72806	16.7798	35.9278	9.65284	NA
2014-07-16	RRSM	Septic Systems	SM4	45	16	18	120	20	743.7	NA	4884.01	10.7259	1.46278	233.286	0.0966376	0.0536422	5.54594	15.8263	34.1312	9.65284	NA
2014-07-16	RRSM	Septic Systems	SM5	60	16	18	120	25	743.7	NA	4706.51	11.7347	1.45037	233.552	0.12753	0.0558818	5.7775	15.8443	45.0418	9.65284	NA

## Sheet: Stream Chemistry
Site	Typology	Latitude	Longitude	Field Duplicate	datetime	DO	Temp	pH	DIC	DOC	TDN	HIX	BIX	FI	NO3
DRAL	Stream burial	39.2902	-76.7465	N	2013-01-02 12:00:00	NA	NA	NA	NA	1.2358	2.7368	NA	NA	NA	3.57
DRAL	Stream burial	39.2902	-76.7465	N	2013-01-31 14:20:00	10.19	8.7	NA	NA	5.42159	2.0246	NA	NA	NA	NA
DRAL	Stream burial	39.2902	-76.7465	N	2013-02-09 08:35:00	10.83	7.9	NA	38.4719	1.06052	2.7238	0.844731	0.862789	1.30002	3.5
DRAL	Stream burial	39.2902	-76.7465	N	2013-03-03 12:10:00	8.5	11.49	NA	36.9462	1.14495	2.61165	NA	NA	NA	3.18
DRAL	Stream burial	39.2902	-76.7465	N	2013-03-13 13:10:00	9.7	10.7	7.83	35.9654	NA	NA	0.820765	0.761823	1.25521	2.64
DRAL	Stream burial	39.2902	-76.7465	N	2013-04-13 13:50:00	10.24	11.9	7.57	36.6959	3.17834	2.8437	0.805481	0.720159	1.21294	3.47
DRAL	Stream burial	39.2902	-76.7465	N	2013-05-01 16:00:00	9.29	12.8	NA	38.0101	2.0291	3.0941	NA	NA	NA	NA
DRAL	Stream burial	39.2902	-76.7465	N	2013-05-23 11:40:00	9.45	15.3	7.81	37.8068	1.0357	2.7745	0.806369	0.870674	1.29519	3.11
DRAL	Stream burial	39.2902	-76.7465	N	2013-06-11 16:25:00	7.81	18.1	NA	31.8373	3.544	1.9807	0.849234	0.809167	1.22487	1.84
DRAL	Stream burial	39.2902	-76.7465	N	2013-07-03 13:05:00	7.71	21.4	NA	24.7538	8.014	1.953	0.859298	0.681405	1.14946	1.27
DRAL	Stream burial	39.2902	-76.7465	N	2013-07-09 09:35:00	8.29	18.4	7.59	36.8299	NA	NA	0.820753	0.893119	1.3012	3.21
DRAL	Stream burial	39.2902	-76.7465	N	2013-07-24 16:45:00	6.86	19.4	7.73	47.1018	1.33924	3.0305	0.824368	0.887363	1.3216	3.18
DRAL	Stream burial	39.2902	-76.7465	N	2013-08-16 16:05:00	8.35	18.3	7.66	35.8354	0.9884	3.0132	0.749199	0.902984	1.29604	3.51
DRAL	Stream burial	39.2902	-76.7465	N	2013-08-27 14:45:00	8.15	19.1	7.79	35.7491	0.9749	2.9403	0.825053	0.833118	1.29678	3.47
DRAL	Stream burial	39.2902	-76.7465	N	2013-09-11 15:05:00	8.62	19.5	NA	32.516	4.5262	4.1223	0.82353	0.744371	1.22466	4.14
DRAL	Stream burial	39.2902	-76.7465	N	2013-09-28 16:20:00	7.92	17.2	NA	36.985	NA	NA	0.80184	0.914873	1.31826	3.58
DRAL	Stream burial	39.2902	-76.7465	N	2013-10-14 13:20:00	9.94	16.4	NA	37.931	NA	NA	0.855825	0.82058	1.30512	3.09
DRAL	Stream burial	39.2902	-76.7465	N	2013-11-08 11:40:00	9.17	12.5	NA	37.711	1.189	3.802	0.771193	0.841746	1.36741	3.29
DRAL	Stream burial	39.2902	-76.7465	N	2013-11-22 15:00:00	10.12	12	8.01	36.9134	0.8232	2.9169	0.783054	0.869	1.3477	3.41
DRAL	Stream burial	39.2902	-76.7465	N	2013-12-13 12:20:00	10.07	8.6	7.89	38.996	NA	NA	0.863764	0.813532	1.32548	NA
DRAL	Stream burial	39.2902	-76.7465	N	2014-01-17 14:15:00	9.18	8.7	7.66	38.769	1.2746	2.5095	0.847166	0.827418	1.27846	2.82
DRAL	Stream burial	39.2902	-76.7465	N	2014-02-01 14:25:00	10.34	7.3	7.02	24.944	2.46747	2.4231	0.765974	0.776077	1.21686	2.48
DRAL	Stream burial	39.2902	-76.7465	N	2014-02-19 13:30:00	12.33	4.5	7.22	8.376	5.02245	1.0108	0.801098	0.723386	1.11235	0.556
DRAL	Stream burial	39.2902	-76.7465	N	2014-03-05 13:05:00	12.33	5	7.08	20.13	9.05709	2.312	NA	NA	NA	0.744
DRAL	Stream burial	39.2902	-76.7465	N	2014-04-04 15:15:00	10.69	10	7.46	37.2985	1.88939	2.6173	NA	NA	NA	NA
DRAL	Stream burial	39.2902	-76.7465	N	2014-04-23 13:25:00	10.96	12	NA	35.048	1.6236	2.8833	0.839435	0.847161	1.27283	2.96
DRAL	Stream burial	39.2902	-76.7465	N	2014-05-08 13:30:00	10.54	13.3	NA	NA	NA	NA	0.843217	0.81672	1.27828	2.9
DRAL	Stream burial	39.2902	-76.7465	N	2014-05-30 08:45:00	9.43	14.7	NA	33.4945	2.5705	2.409	0.847312	0.805636	1.22959	2.54
DRAL	Stream burial	39.2902	-76.7465	N	2014-06-19 15:40:00	NA	21.1	NA	26.8965	NA	NA	0.862291	0.711945	1.21992	2.2
DRAL	Stream burial	39.2902	-76.7465	N	2014-07-16 16:00:00	NA	18.5	NA	33.1723	2.4958	NA	0.863626	0.748017	1.22011	2.51
DRAL	Stream burial	39.2902	-76.7465	N	2014-08-20 13:00:00	NA	18.8	7.72	34.2775	1.3497	2.6821	0.838666	0.803784	1.26976	2.86
DRAL	Stream burial	39.2902	-76.7465	Y	2014-09-10 16:10:00	NA	19.3	7.75	36.8722	1.1271	3.0513	0.824705	0.8581	1.2439	3.36
DRAL	Stream burial	39.2902	-76.7465	N	2014-09-10 16:10:00	NA	19.3	7.75	37.3322	1.1841	3.1213	0.813878	0.844668	1.23725	3.33
DRAL	Stream burial	39.2902	-76.7465	N	2014-09-24 16:05:00	NA	17.2	7.04	35.584	0.6667	2.9562	0.829848	0.876945	1.29415	3.24
DRAL	Stream burial	39.2902	-76.7465	N	2014-10-22 16:10:00	NA	14.8	7.62	25.95	8.2142	1.7439	0.858233	0.670644	1.18923	1.81
DRAL	Stream burial	39.2902	-76.7465	N	2014-11-10 14:30:00	8.53	13.4	7.96	38.101	1.0514	2.7684	0.81784	0.821989	1.2662	3.21
DRAL	Stream burial	39.2902	-76.7465	N	2014-11-25 13:15:00	9.35	12	7.94	39.941	2.5016	2.7543	0.852708	0.807033	1.2683	3.04
DRAL	Stream burial	39.2902	-76.7465	N	2014-12-03 15:00:00	8.23	10.6	7.16	74.8505	2.80949	2.5868	NA	NA	NA	2.72
DRGG	In-line SWM	39.3159	-76.7588	N	2013-01-15 09:00:00	10.76	7.4	NA	NA	NA	NA	0.82683	0.620368	1.09151	0.441
DRGG	In-line SWM	39.3159	-76.7588	N	2013-01-31 13:50:00	10.65	7.5	NA	NA	1.29659	0.1216	NA	NA	NA	NA
DRGG	In-line SWM	39.3159	-76.7588	N	2013-01-31 13:50:00	10.65	7.5	NA	NA	3.50759	0.4413	NA	NA	NA	NA
DRGG	In-line SWM	39.3159	-76.7588	N	2013-02-09 09:40:00	7.89	5	NA	63.7219	3.29252	1.2918	0.878623	0.81704	1.21518	1.34
DRGG	In-line SWM	39.3159	-76.7588	N	2013-03-03 11:30:00	0.447917	8.1	NA	67.3362	2.09994	0.98765	0.874407	0.838423	1.28049	1.27
DRGG	In-line SWM	39.3159	-76.7588	N	2013-03-19 16:00:00	10.34	10	8.9	42.7454	6.5868	0.9478	0.856345	0.667576	1.16386	0.945
DRGG	In-line SWM	39.3159	-76.7588	N	2013-04-13 14:50:00	9.63	15.1	7.59	68.1759	5.26634	1.0287	0.845676	0.748375	1.20158	0.97
DRGG	In-line SWM	39.3159	-76.7588	N	2013-05-01 16:20:00	7.82	15.1	NA	68.2201	5.4771	1.0891	0.87078	0.698317	1.16894	NA
DRGG	In-line SWM	39.3159	-76.7588	N	2013-05-23 12:15:00	6.32	17.8	7.25	65.8068	7.1967	2.1595	0.872367	0.553849	1.44784	1.76
DRGG	In-line SWM	39.3159	-76.7588	N	2013-06-11 16:10:00	6.53	19.8	NA	52.3073	10.688	1.2697	0.897173	0.630943	1.14817	NA
DRGG	In-line SWM	39.3159	-76.7588	N	2013-07-03 12:25:00	0.61	24.6	NA	21.2338	11.64	0.9788	0.877415	0.675329	1.09677	0.175
DRGG	In-line SWM	39.3159	-76.7588	N	2013-07-09 13:05:00	5.22	19.4	7.57	75.5099	NA	NA	0.859256	0.86556	1.33013	1.45
DRGG	In-line SWM	39.3159	-76.7588	N	2013-07-24 15:10:00	NA	22.4	7.33	98.3218	3.99724	1.4235	0.881894	0.628128	1.4696	1.31
DRGG	In-line SWM	39.3159	-76.7588	N	2013-08-16 14:40:00	5.6	18.9	7.51	71.8754	2.4574	1.6742	0.664056	0.880485	1.33263	1.56
DRGG	In-line SWM	39.3159	-76.7588	N	2013-08-27 13:25:00	5.18	20.4	7.58	74.5991	3.6749	1.6033	0.884471	0.64638	1.23672	1.2
DRGG	In-line SWM	39.3159	-76.7588	N	2013-09-11 13:35:00	6.07	21.9	NA	65.816	2.6352	2.0103	0.822025	0.700417	1.5504	1.88
DRGG	In-line SWM	39.3159	-76.7588	N	2013-09-28 14:25:00	2.84	16.4	NA	74.165	NA	NA	0.812949	0.794851	1.37907	0.822
DRGG	In-line SWM	39.3159	-76.7588	N	2013-10-14 12:45:00	8.2	17	NA	71.001	NA	NA	0.897164	0.738904	1.21235	1.13
DRGG	In-line SWM	39.3159	-76.7588	N	2013-11-08 10:40:00	2.11	10	NA	63.461	16.984	0.855	NA	NA	NA	0.305
DRGG	In-line SWM	39.3159	-76.7588	N	2013-11-22 13:45:00	1.65	10	7.4	73.6034	4.0552	0.6815	0.425869	0.741797	1.38689	0.623
DRGG	In-line SWM	39.3159	-76.7588	N	2013-12-13 13:45:00	7.96	7.4	7.49	54.746	NA	NA	NA	NA	NA	NA
DRGG	In-line SWM	39.3159	-76.7588	N	2014-01-17 13:00:00	9.1	6.9	7.64	31.129	2.4786	1.2305	0.83951	0.742222	1.24234	1.26
DRGG	In-line SWM	39.3159	-76.7588	N	2014-02-01 13:15:00	10.66	5.4	7.07	24.404	1.88147	1.3171	0.818182	0.800188	1.26811	1.46
DRGG	In-line SWM	39.3159	-76.7588	N	2014-02-19 12:25:00	12.56	2.3	7.46	12.47	7.61945	1.0628	0.849589	0.677538	1.11459	0.58
DRGG	In-line SWM	39.3159	-76.7588	N	2014-03-05 12:30:00	12.01	4.4	7.45	25.49	4.72009	1.772	NA	NA	NA	0.453
DRGG	In-line SWM	39.3159	-76.7588	N	2014-04-04 14:00:00	10.9	8	7.49	36.1085	3.40139	1.0693	NA	NA	NA	NA
DRGG	In-line SWM	39.3159	-76.7588	N	2014-04-23 12:30:00	10.2	10.5	NA	29.608	4.6776	1.6873	0.874429	0.705006	1.17266	1.61
DRGG	In-line SWM	39.3159	-76.7588	N	2014-05-08 12:45:00	10.18	12.1	NA	NA	NA	NA	0.849748	0.758296	1.2297	1.97
DRGG	In-line SWM	39.3159	-76.7588	N	2014-05-30 11:40:00	14.1	8.6	NA	31.7945	4.7085	1.686	0.862175	0.738148	1.16484	1.58
DRGG	In-line SWM	39.3159	-76.7588	N	2014-06-19 13:00:00	NA	16.2	NA	26.8965	NA	NA	0.876179	0.627832	1.15197	1.7
DRGG	In-line SWM	39.3159	-76.7588	N	2014-07-16 14:30:00	NA	19	NA	63.4123	6.4078	NA	0.903392	0.670364	1.13107	0.327
DRGG	In-line SWM	39.3159	-76.7588	N	2014-08-20 12:35:00	NA	19.6	7.46	74.3575	1.5017	1.0591	0.847044	0.853328	1.32377	0.896
DRGG	In-line SWM	39.3159	-76.7588	N	2014-09-10 15:45:00	NA	20.2	7.5	67.7522	3.3331	1.2463	0.777829	0.728321	1.28022	1.36
DRGG	In-line SWM	39.3159	-76.7588	N	2014-09-24 15:45:00	NA	16.5	7.49	65.994	1.4417	1.0092	0.813245	0.838187	1.34059	1.1
DRGG	In-line SWM	39.3159	-76.7588	N	2014-10-22 11:30:00	NA	14.9	7.85	23.06	13.2352	1.1369	0.872354	0.584202	1.09766	NA
DRGG	In-line SWM	39.3159	-76.7588	N	2014-11-10 14:00:00	2.95	12.5	7.5	76.941	3.0424	0.5821	0.805575	0.761816	1.42012	0.612
DRGG	In-line SWM	39.3159	-76.7588	Y	2014-11-10 14:00:00	2.95	12.5	7.5	76.941	3.0424	0.5821	0.704835	0.953587	1.34709	0.634
DRGG	In-line SWM	39.3159	-76.7588	N	2014-11-25 12:50:00	6.6	11.5	7.63	60.031	7.5096	0.8863	0.845787	0.726121	1.20107	0.675
DRGG	In-line SWM	39.3159	-76.7588	N	2014-12-03 14:15:00	8.5	7.9	7.85	65.0605	10.2655	0.9368	NA	NA	NA	0.377
DRIS	Stream burial	39.3018	-76.748	N	2013-01-15 13:00:00	8.83	8.3	NA	NA	NA	NA	NA	NA	NA	1.46
DRIS	Stream burial	39.3018	-76.748	N	2013-01-27 09:00:00	NA	NA	NA	NA	1.57059	2.4846	NA	NA	NA	NA
DRIS	Stream burial	39.3018	-76.748	N	2013-01-31 14:00:00	10.27	9	NA	NA	3.70859	2.3256	NA	NA	NA	NA
DRIS	Stream burial	39.3018	-76.748	N	2013-02-09 08:45:00	9.86	4.3	NA	36.7219	1.27352	2.4458	0.856286	0.836785	1.25244	3.26
DRIS	Stream burial	39.3018	-76.748	N	2013-03-03 12:30:00	13.4	7.1	NA	35.9661	1.12295	2.23465	0.849873	0.891055	1.34267	2.73
DRIS	Stream burial	39.3018	-76.748	Y	2013-03-03 12:30:00	13.4	7.1	NA	35.7362	1.08495	2.28365	0.860984	0.836197	1.32538	2.78
DRIS	Stream burial	39.3018	-76.748	N	2013-03-13 14:25:00	11.01	9.3	7.56	36.2354	1.4238	2.1628	NA	NA	NA	2.47
DRIS	Stream burial	39.3018	-76.748	N	2013-04-13 14:30:00	10.35	15	7.31	37.3059	1.69234	2.2397	0.845116	0.774432	1.25448	2.66
DRIS	Stream burial	39.3018	-76.748	N	2013-05-01 16:10:00	7.84	15.5	NA	38.2401	2.3771	2.5891	0.802941	0.799444	1.25046	NA
DRIS	Stream burial	39.3018	-76.748	N	2013-05-23 12:05:00	6.78	17.7	7.38	37.7325	2.0677	2.5055	0.832968	0.776826	1.24913	2.58
DRIS	Stream burial	39.3018	-76.748	N	2013-06-11 16:40:00	6.98	20.3	NA	35.5973	2.734	2.6377	0.86716	0.748132	1.27375	2.56
DRIS	Stream burial	39.3018	-76.748	N	2013-07-03 12:40:00	6.83	24.1	NA	16.8938	5.989	1.159	0.867229	0.765761	1.13897	0.65
DRIS	Stream burial	39.3018	-76.748	N	2013-07-09 11:50:00	6.96	20.4	7.5	37.3799	NA	NA	0.82284	0.851868	1.33259	3.02
DRIS	Stream burial	39.3018	-76.748	N	2013-07-24 15:50:00	4.86	21.6	7.27	47.5218	1.84924	2.8585	0.827572	0.809309	1.28703	2.8
DRIS	Stream burial	39.3018	-76.748	N	2013-08-16 15:15:00	6.79	19	7.47	36.0954	1.4834	3.5662	0.808873	0.858885	1.29634	3.05
DRIS	Stream burial	39.3018	-76.748	N	2013-08-27 13:10:00	4.91	21.1	7.27	34.8491	7.8029	2.9383	0.878628	0.637237	1.18517	2.8
DRIS	Stream burial	39.3018	-76.748	N	2013-09-11 14:20:00	5.37	21.7	NA	34.636	1.5392	2.3173	0.806281	0.826119	1.2456	2.48
DRIS	Stream burial	39.3018	-76.748	N	2013-09-28 15:30:00	6.68	16.3	NA	36.105	NA	NA	NA	NA	NA	2.69
DRIS	Stream burial	39.3018	-76.748	N	2013-10-14 13:00:00	9.17	16.9	NA	36.671	NA	NA	0.826243	0.799186	1.27821	NA
DRIS	Stream burial	39.3018	-76.748	N	2013-11-08 11:05:00	7.23	10.7	NA	38.971	1.859	3.136	0.756823	0.752739	1.30942	2.62
DRIS	Stream burial	39.3018	-76.748	N	2013-11-22 14:25:00	6.71	12	7.22	36.6634	3.2812	3.5029	0.737304	0.66727	1.26607	2.38
DRIS	Stream burial	39.3018	-76.748	N	2013-12-13 13:00:00	9.94	7.1	7.39	26.146	NA	NA	0.692057	0.812432	1.25611	NA
DRIS	Stream burial	39.3018	-76.748	N	2014-01-17 13:30:00	8.85	8.2	7.33	36.239	1.3266	2.5135	0.842385	0.835782	1.31369	2.8
DRIS	Stream burial	39.3018	-76.748	N	2014-02-01 13:50:00	10.5	6.9	6.81	32.194	1.28847	2.5301	0.786165	0.839524	1.27173	2.84
DRIS	Stream burial	39.3018	-76.748	N	2014-02-19 12:55:00	12.64	3.1	7.44	6.403	4.75345	0.9178	0.80548	0.669216	1.11011	0.365
DRIS	Stream burial	39.3018	-76.748	N	2014-03-05 13:45:00	11.81	5.8	7.26	13.7	3.89609	1.561	NA	NA	NA	0.47
DRIS	Stream burial	39.3018	-76.748	N	2014-04-04 14:25:00	10.83	10.5	7.07	34.4085	2.28639	2.7373	NA	NA	NA	NA
DRIS	Stream burial	39.3018	-76.748	N	2014-04-23 13:00:00	10.45	13.1	NA	34.998	2.0226	2.6673	0.795699	0.704962	1.45287	2.67
DRIS	Stream burial	39.3018	-76.748	N	2014-05-08 13:00:00	9.58	16.9	NA	NA	NA	NA	0.806761	0.819128	1.3233	2.72
DRIS	Stream burial	39.3018	-76.748	N	2014-05-30 09:45:00	7.06	15.5	NA	37.9145	2.3785	2.469	0.862803	0.832919	1.21205	2.27
DRIS	Stream burial	39.3018	-76.748	N	2014-06-19 15:00:00	NA	20.6	NA	34.9165	NA	NA	0.855094	0.814487	1.25986	2.57
DRIS	Stream burial	39.3018	-76.748	N	2014-07-16 15:15:00	NA	20	NA	37.1423	1.7538	NA	0.848659	0.824055	1.25498	2.28
DRIS	Stream burial	39.3018	-76.748	N	2014-08-20 12:45:00	NA	21	7.45	36.1275	1.2097	2.6401	0.800317	0.789669	1.4172	2.94
DRIS	Stream burial	39.3018	-76.748	N	2014-09-10 15:55:00	NA	20.5	7.42	37.1622	1.2061	2.4853	0.812765	0.805331	1.27264	2.76
DRIS	Stream burial	39.3018	-76.748	N	2014-09-24 15:55:00	NA	16.7	7.32	34.234	1.5287	2.4622	NA	NA	NA	1.71
DRIS	Stream burial	39.3018	-76.748	N	2014-10-22 15:55:00	NA	15	7.51	22.51	6.8392	1.8449	NA	NA	NA	1.74
DRIS	Stream burial	39.3018	-76.748	N	2014-11-10 14:20:00	7.9	13	7.45	39.991	1.1664	2.3564	0.818682	0.82861	1.33244	2.71
DRIS	Stream burial	39.3018	-76.748	N	2014-11-25 13:00:00	8.82	11.5	7.35	41.921	2.4246	2.1353	0.779316	0.759609	1.26855	0.377
DRIS	Stream burial	39.3018	-76.748	N	2014-12-03 14:30:00	7.61	10.2	7.34	71.4905	3.32949	2.1608	NA	NA	NA	1.87
DRKV	In-line SWM	39.3236	-76.7542	N	2013-01-09 12:00:00	8.45	9	NA	NA	0.8032	3.4189	NA	NA	NA	4.26
DRKV	In-line SWM	39.3236	-76.7542	N	2013-01-31 13:40:00	8.99	9.4	NA	NA	2.78159	0.3543	NA	NA	NA	NA
DRKV	In-line SWM	39.3236	-76.7542	N	2013-02-09 09:50:00	7.8	5.1	NA	39.1519	1.86352	2.6278	0.862634	0.726101	1.2013	2.99
DRKV	In-line SWM	39.3236	-76.7542	N	2013-03-03 11:20:00	9.43	7.2	NA	43.9162	1.41595	2.46865	0.869003	0.7763	1.26372	3.13
DRKV	In-line SWM	39.3236	-76.7542	N	2013-03-18 16:15:00	6.91	8.3	7.29	47.5954	1.1778	3.0058	0.874423	0.760708	1.25149	3.58
DRKV	In-line SWM	39.3236	-76.7542	N	2013-04-13 15:00:00	8.7	14	7.41	38.3059	2.68834	2.6487	0.874773	0.735671	1.40363	2.82
DRKV	In-line SWM	39.3236	-76.7542	N	2013-05-01 16:30:00	6.46	14.7	NA	44.0901	2.9541	2.9541	0.862847	0.688692	1.167	NA
DRKV	In-line SWM	39.3236	-76.7542	N	2013-05-22 18:30:00	5.9	15.9	6.94	48.4525	1.3197	3.3985	0.831227	0.798444	1.28114	NA
DRKV	In-line SWM	39.3236	-76.7542	N	2013-06-11 16:00:00	5.04	20.7	NA	38.4173	5.57	1.4707	0.875227	0.657354	1.17349	1.2
DRKV	In-line SWM	39.3236	-76.7542	N	2013-07-03 11:50:00	6.65	23.1	NA	14.0738	6.307	0.8748	0.846942	0.736421	1.12337	0.341
DRKV	In-line SWM	39.3236	-76.7542	N	2013-07-09 14:10:00	6.73	17.5	7.23	48.4999	NA	NA	0.845347	0.78271	1.27329	3.53
DRKV	In-line SWM	39.3236	-76.7542	N	2013-07-24 14:20:00	4.76	18.4	7.07	63.4718	1.77324	3.2695	0.858806	0.752524	1.23808	3.37
DRKV	In-line SWM	39.3236	-76.7542	N	2013-08-16 13:55:00	6.1	16.7	7.16	47.5254	1.5674	3.7322	0.83866	0.839284	1.30477	NA
DRKV	In-line SWM	39.3236	-76.7542	N	2013-08-27 12:45:00	5.92	17.6	7.13	46.9491	1.1379	3.5643	0.845152	0.812133	1.31973	3.49
DRKV	In-line SWM	39.3236	-76.7542	N	2013-09-11 12:35:00	8.23	17.5	NA	43.816	4.5792	3.8703	NA	NA	NA	3.84
DRKV	In-line SWM	39.3236	-76.7542	N	2013-09-28 13:40:00	7.4	15.1	NA	45.285	NA	NA	0.816089	0.879555	1.3172	3.78
DRKV	In-line SWM	39.3236	-76.7542	N	2013-10-14 12:35:00	6.14	15.2	NA	47.571	NA	NA	0.890706	0.730803	1.23812	NA
DRKV	In-line SWM	39.3236	-76.7542	N	2013-11-08 10:00:00	7.12	11.1	NA	46.301	1.797	3.372	0.869655	0.739563	1.24496	3.21
DRKV	In-line SWM	39.3236	-76.7542	N	2013-11-22 13:10:00	8.14	11.5	7.18	45.3834	2.8962	3.1989	0.84648	0.827894	1.2956	3.85
DRKV	In-line SWM	39.3236	-76.7542	N	2013-12-13 14:25:00	7.61	7.2	7.15	43.306	NA	NA	0.850778	0.759867	1.23868	NA
DRKV	In-line SWM	39.3236	-76.7542	N	2014-01-17 12:20:00	6.7	6.8	7.07	44.179	2.3736	2.1985	0.870569	0.718724	1.22611	2.41
DRKV	In-line SWM	39.3236	-76.7542	Y	2014-02-01 12:45:00	9.18	7.1	6.46	41.304	1.08747	3.0771	0.863661	0.849024	1.30764	3.6
DRKV	In-line SWM	39.3236	-76.7542	N	2014-02-01 12:45:00	9.18	7.1	6.46	41.414	2.02747	3.1801	NA	NA	NA	3.57
DRKV	In-line SWM	39.3236	-76.7542	N	2014-02-19 12:00:00	11.4	1.2	7.08	15.19	5.65545	1.0928	NA	NA	NA	0.437
DRKV	In-line SWM	39.3236	-76.7542	N	2014-03-05 12:00:00	9.19	5.5	6.85	38.02	2.34609	2.973	NA	NA	NA	1.03
DRKV	In-line SWM	39.3236	-76.7542	N	2014-04-04 13:15:00	7.04	10	7.48	25.5885	2.63339	1.6123	NA	NA	NA	NA
DRKV	In-line SWM	39.3236	-76.7542	N	2014-04-23 12:05:00	7.18	11.6	NA	43.428	4.2326	2.0033	0.873157	0.696833	1.17718	2.08
DRKV	In-line SWM	39.3236	-76.7542	N	2014-05-08 11:40:00	6.64	14.2	NA	NA	NA	NA	0.867076	0.687117	1.20039	1.94
DRKV	In-line SWM	39.3236	-76.7542	N	2014-05-30 12:15:00	9.33	17.9	NA	35.0245	4.1635	1.524	0.875065	0.688562	1.1662	1.46
DRKV	In-line SWM	39.3236	-76.7542	N	2014-06-19 13:00:00	NA	21.6	NA	20.3765	NA	NA	0.851665	0.640296	1.16075	NA
DRKV	In-line SWM	39.3236	-76.7542	N	2014-07-16 13:55:00	NA	18	NA	38.9523	3.5958	NA	NA	NA	NA	1.88
DRKV	In-line SWM	39.3236	-76.7542	N	2014-08-20 12:30:00	NA	17.3	7.17	49.7575	1.3567	3.2591	0.849032	0.807008	1.26546	3.38
DRKV	In-line SWM	39.3236	-76.7542	N	2014-09-10 15:35:00	NA	17.2	7.26	52.0322	1.3361	3.2693	0.857445	0.834544	1.31298	3.67
DRKV	In-line SWM	39.3236	-76.7542	N	2014-09-24 15:35:00	NA	15.5	7.23	45.894	1.4257	3.1942	0.886861	0.847419	1.34092	2.47
DRKV	In-line SWM	39.3236	-76.7542	N	2014-10-22 15:40:00	NA	13.5	7.49	10.24	4.5332	0.4505	0.829765	0.640299	1.18999	0.29
DRKV	In-line SWM	39.3236	-76.7542	N	2014-11-10 13:25:00	5.95	12.5	7.18	48.501	1.1134	3.0284	0.866377	0.780701	1.26286	3.32
DRKV	In-line SWM	39.3236	-76.7542	N	2014-11-25 12:45:00	7.68	11	7.31	42.921	2.6946	2.0203	0.878426	0.663362	1.21094	2.29
DRKV	In-line SWM	39.3236	-76.7542	N	2014-12-03 14:05:00	7.55	8	7.6	50.2505	3.53549	0.9478	NA	NA	NA	0.97
RRRB	Floodplain Preservation	39.4137	-76.8035	N	2013-01-08 12:00:00	10.85	19	NA	NA	0.7988	0.3923	NA	NA	NA	0.427
RRRB	Floodplain Preservation	39.4137	-76.8035	N	2013-01-16 13:30:00	12.09	4.8	NA	NA	1.77459	0.2163	NA	NA	NA	NA
RRRB	Floodplain Preservation	39.4137	-76.8035	N	2013-01-31 12:00:00	11.16	7.1	NA	NA	1.54959	0.1973	NA	NA	NA	NA
RRRB	Floodplain Preservation	39.4137	-76.8035	Y	2013-02-09 12:45:00	11.28	2.7	NA	4.0129	0.66722	0.4182	0.821561	0.797989	1.34666	0.45
RRRB	Floodplain Preservation	39.4137	-76.8035	N	2013-02-09 12:45:00	11.28	2.7	NA	4.0249	0.66012	0.4208	0.794505	0.799588	1.3941	0.433
RRRB	Floodplain Preservation	39.4137	-76.8035	N	2013-03-03 10:40:00	13.36	2.4	NA	4.03015	0.638145	0.38675	0.830381	0.786514	1.42712	0.466
RRRB	Floodplain Preservation	39.4137	-76.8035	N	2013-03-18 11:45:00	11.48	3.7	6.98	4.6354	0.6733	0.4838	0.821208	0.787145	1.35727	0.49
RRRB	Floodplain Preservation	39.4137	-76.8035	N	2013-05-01 13:55:00	8.8	15.8	NA	5.4371	1.2201	0.4137	0.88889	0.705833	1.31713	NA
RRRB	Floodplain Preservation	39.4137	-76.8035	N	2013-05-22 16:50:00	6.14	21.5	6.7	7.9405	1.4527	0.3654	0.897951	0.699728	1.31863	0.297
RRRB	Floodplain Preservation	39.4137	-76.8035	N	2013-06-11 14:25:00	6.41	20.9	NA	7.5896	3.1516	0.36	0.842693	0.654344	1.20182	0.171
RRRB	Floodplain Preservation	39.4137	-76.8035	N	2013-07-03 14:15:00	7.45	22.8	NA	12.8138	4.046	0.6508	0.854573	0.703162	1.25632	0.075
RRRB	Floodplain Preservation	39.4137	-76.8035	N	2013-07-10 12:55:00	7.17	22	6.79	7.6151	2.0516	0.4336	0.799774	0.686955	1.30478	0.305
RRRB	Floodplain Preservation	39.4137	-76.8035	N	2013-07-24 09:30:00	7.89	21.2	6.43	8.1598	1.42524	0.4007	0.895169	0.719048	1.33414	0.226
RRRB	Floodplain Preservation	39.4137	-76.8035	N	2013-08-16 12:15:00	6.61	18.8	6.89	5.3554	1.1194	0.4557	0.893069	0.736978	1.35401	0.35
RRRB	Floodplain Preservation	39.4137	-76.8035	N	2013-08-27 11:15:00	7.5	21.4	6.82	3.6461	0.9259	0.3415	0.89013	0.71691	1.37079	0.284
RRRB	Floodplain Preservation	39.4137	-76.8035	N	2013-09-14 12:05:00	7.64	16.7	NA	2.795	1.0222	0.3201	0.87609	0.721655	1.33542	0.127
RRRB	Floodplain Preservation	39.4137	-76.8035	N	2013-09-28 12:00:00	15.4	8.87	NA	2.185	NA	NA	NA	NA	NA	0.283
RRRB	Floodplain Preservation	39.4137	-76.8035	N	2013-10-14 11:25:00	9.25	15.1	NA	3.548	NA	NA	0.867444	0.740065	1.32729	0.198
RRRB	Floodplain Preservation	39.4137	-76.8035	N	2013-11-07 16:30:00	9.21	7.1	NA	3.632	4.768	0.1709	0.730071	0.434591	1.21441	0.0616
RRRB	Floodplain Preservation	39.4137	-76.8035	N	2013-11-22 11:15:00	8.26	9	6.22	2.6464	1.1562	0.2773	0.837186	0.691184	1.37011	0.214
RRRB	Floodplain Preservation	39.4137	-76.8035	N	2013-12-13 10:50:00	13.02	1.1	6.41	4.122	NA	NA	0.813041	0.771258	1.35155	NA
RRRB	Floodplain Preservation	39.4137	-76.8035	N	2014-01-17 11:00:00	10.76	2.8	6.6	4.534	0.6813	0.3257	NA	NA	NA	0.32
RRRB	Floodplain Preservation	39.4137	-76.8035	N	2014-02-01 11:55:00	12.54	0.2	6.2	3.141	0.73417	0.4797	0.825778	0.760961	1.33054	0.455
RRRB	Floodplain Preservation	39.4137	-76.8035	N	2014-02-19 10:25:00	12.43	1.4	6.43	4.507	1.34745	0.448	0.803304	0.74526	1.32269	0.358
RRRB	Floodplain Preservation	39.4137	-76.8035	N	2014-03-05 10:40:00	13.28	9.3	6.16	6.105	0.90029	0.5746	NA	NA	NA	0.406
RRRB	Floodplain Preservation	39.4137	-76.8035	N	2014-03-27 13:05:00	11.94	5.1	7.05	4.4977	0.98844	0.5595	NA	NA	NA	NA
RRRB	Floodplain Preservation	39.4137	-76.8035	N	2014-04-23 10:45:00	8.86	10.9	NA	5.097	1.3276	0.3347	0.889803	0.672556	1.26603	0.293
RRRB	Floodplain Preservation	39.4137	-76.8035	N	2014-05-08 10:15:00	9.98	12.5	NA	NA	NA	NA	0.869539	0.698575	1.28119	0.307
RRRB	Floodplain Preservation	39.4137	-76.8035	N	2014-05-30 13:50:00	7.78	17.1	NA	7.8855	2.9945	0.1739	0.882276	0.697184	1.26825	0.143
RRRB	Floodplain Preservation	39.4137	-76.8035	N	2014-06-19 11:05:00	6.76	23.1	NA	9.1915	NA	NA	0.864198	0.692488	1.17256	0.0658
RRRB	Floodplain Preservation	39.4137	-76.8035	N	2014-07-16 11:30:00	NA	20.5	NA	8.5473	2.4188	NA	0.860441	0.737048	1.27317	0.124
RRRB	Floodplain Preservation	39.4137	-76.8035	N	2014-08-20 11:30:00	NA	20.1	6.62	4.6815	1.7257	0.2846	0.876673	0.720913	1.34826	0.136
RRRB	Floodplain Preservation	39.4137	-76.8035	N	2014-09-10 08:35:00	NA	20.4	6.1	4.6572	1.2651	0.3092	NA	NA	NA	NA
RRRB	Floodplain Preservation	39.4137	-76.8035	N	2014-09-24 10:45:00	NA	15.4	6.56	2.681	0.5527	0.3008	0.880351	0.727108	1.37824	0.226
RRRB	Floodplain Preservation	39.4137	-76.8035	N	2014-10-22 14:40:00	NA	13.9	7.19	5.477	4.1602	0.1632	0.83493	0.665499	1.16759	NA
RRRB	Floodplain Preservation	39.4137	-76.8035	N	2014-11-10 12:35:00	7.5	11.2	6.59	4.924	1.0344	0.2	0.865074	0.745618	1.3505	0.23
RRRB	Floodplain Preservation	39.4137	-76.8035	N	2014-11-25 11:55:00	9.5	8.9	7.02	5.246	1.1816	0.186	0.833859	0.752441	1.33293	0.112
RRRB	Floodplain Preservation	39.4137	-76.8035	N	2014-12-10 14:00:00	11.89	6.1	7.5	5.6348	1.7476	0.1783	NA	NA	NA	NA
RRRM	Floodplain Preservation	39.3941	-76.8138	N	2013-01-10 12:00:00	14.31	4.4	NA	NA	NA	NA	NA	NA	NA	NA
RRRM	Floodplain Preservation	39.3941	-76.8138	N	2013-01-16 14:00:00	12.19	4.5	NA	NA	4.2588	0.3849	NA	NA	NA	0.175
RRRM	Floodplain Preservation	39.3941	-76.8138	N	2013-01-16 14:00:00	12.19	4.5	NA	NA	1.95759	0.5987	NA	NA	NA	NA
RRRM	Floodplain Preservation	39.3941	-76.8138	N	2013-01-31 13:00:00	10.36	8.9	NA	NA	3.97959	0.2935	NA	NA	NA	NA
RRRM	Floodplain Preservation	39.3941	-76.8138	N	2013-02-09 10:15:00	0.50625	0.8	NA	13.5019	1.27652	0.5228	0.826436	0.725618	1.19779	0.584
RRRM	Floodplain Preservation	39.3941	-76.8138	N	2013-03-03 10:55:00	14.76	2.7	NA	12.6061	1.18395	0.42825	0.842002	0.697504	1.22943	0.505
RRRM	Floodplain Preservation	39.3941	-76.8138	N	2013-03-18 10:55:00	NA	3.8	7.69	13.5954	1.1011	0.4827	0.8517	0.701746	1.25015	0.588
RRRM	Floodplain Preservation	39.3941	-76.8138	N	2013-05-01 13:45:00	10.62	15.2	NA	14.6101	3.2531	0.363	0.876468	0.648037	1.15149	NA
RRRM	Floodplain Preservation	39.3941	-76.8138	Y	2013-05-01 13:45:00	10.62	15.2	NA	14.6401	3.5461	0.3714	NA	NA	NA	NA
RRRM	Floodplain Preservation	39.3941	-76.8138	N	2013-05-23 13:40:00	8.49	18.3	7.58	17.5068	NA	0.5054	NA	NA	NA	0.411
RRRM	Floodplain Preservation	39.3941	-76.8138	N	2013-06-11 14:40:00	7	21.7	NA	8.7603	6.181	0.458	0.846867	0.567954	1.13523	0.146
RRRM	Floodplain Preservation	39.3941	-76.8138	N	2013-07-03 14:30:00	6.9	24.5	NA	18.0838	7.374	0.8597	0.845976	0.717007	1.16975	0.209
RRRM	Floodplain Preservation	39.3941	-76.8138	Y	2013-07-10 14:10:00	7.64	22.4	7.51	15.2961	2.2716	0.6681	0.816132	0.725733	1.16876	0.577
RRRM	Floodplain Preservation	39.3941	-76.8138	N	2013-07-10 14:10:00	7.64	22.4	7.51	15.2761	2.4156	0.6766	0.855559	0.690879	1.24374	0.535
RRRM	Floodplain Preservation	39.3941	-76.8138	N	2013-07-24 12:40:00	5.88	22.2	7.44	18.5018	2.88524	0.4922	0.876498	0.690088	1.22962	0.398
RRRM	Floodplain Preservation	39.3941	-76.8138	N	2013-08-16 13:00:00	8.25	18.3	7.5	11.9054	1.2574	0.6819	0.856355	0.692321	1.24604	0.565
RRRM	Floodplain Preservation	39.3941	-76.8138	N	2013-08-27 11:55:00	7.12	20.9	7.69	11.9491	1.7389	0.6101	0.896731	0.634695	1.22246	0.487
RRRM	Floodplain Preservation	39.3941	-76.8138	N	2013-09-14 12:30:00	6.95	17.4	NA	14.726	4.5142	0.2844	0.87616	0.722828	1.25518	0.0344
RRRM	Floodplain Preservation	39.3941	-76.8138	N	2013-09-28 13:00:00	8.9	16	NA	14.485	NA	NA	0.892161	0.671187	1.24508	0.158
RRRM	Floodplain Preservation	39.3941	-76.8138	N	2013-10-14 11:45:00	6.87	15.1	NA	10.601	NA	NA	0.887709	0.603919	1.18494	0.165
RRRM	Floodplain Preservation	39.3941	-76.8138	N	2013-11-08 08:55:00	9.21	7.1	NA	13.701	3.821	0.1465	0.849211	0.599624	1.2147	NA
RRRM	Floodplain Preservation	39.3941	-76.8138	N	2013-11-22 11:50:00	10.52	8	7.34	11.7434	1.9312	0.3421	0.869808	0.630753	1.21795	0.219
RRRM	Floodplain Preservation	39.3941	-76.8138	N	2013-12-13 11:25:00	13.58	0.6	7.11	10.216	NA	NA	0.866221	0.671542	1.22497	NA
RRRM	Floodplain Preservation	39.3941	-76.8138	N	2014-01-17 11:25:00	11.62	2.5	7.2	12.769	1.8336	0.455	0.855643	0.683366	1.23289	0.494
RRRM	Floodplain Preservation	39.3941	-76.8138	Y	2014-01-17 11:25:00	11.62	2.5	7.2	12.669	1.5476	0.4997	0.303817	0.862642	1.16808	0.413
RRRM	Floodplain Preservation	39.3941	-76.8138	N	2014-02-01 12:15:00	14.13	0.3	6.5	10.934	0.98347	0.6247	NA	NA	NA	0.68
RRRM	Floodplain Preservation	39.3941	-76.8138	N	2014-02-19 11:05:00	12.51	1.1	7.15	11.4	3.93845	1.0998	0.826509	0.684699	1.16562	0.454
RRRM	Floodplain Preservation	39.3941	-76.8138	N	2014-03-05 11:15:00	14.8	0.6	6.43	14.57	1.64709	0.8244	NA	NA	NA	0.624
RRRM	Floodplain Preservation	39.3941	-76.8138	N	2014-03-27 16:00:00	11.48	7.3	7.08	12.2097	2.40044	1.3706	NA	NA	NA	1.34
RRRM	Floodplain Preservation	39.3941	-76.8138	N	2014-04-23 11:20:00	10.76	11	NA	16.218	3.8076	0.4587	0.887797	0.627576	1.14996	0.249
RRRM	Floodplain Preservation	39.3941	-76.8138	N	2014-05-08 10:55:00	11.01	13.8	NA	NA	NA	NA	0.877938	0.627557	1.17757	0.254
RRRM	Floodplain Preservation	39.3941	-76.8138	N	2014-05-30 13:20:00	8.84	15.8	NA	17.1145	4.5425	0.4581	0.872178	0.647489	1.17889	0.286
RRRM	Floodplain Preservation	39.3941	-76.8138	N	2014-06-19 11:50:00	7.2	22.1	NA	5.8825	NA	NA	0.853599	0.572941	1.15002	0.284
RRRM	Floodplain Preservation	39.3941	-76.8138	N	2014-07-16 12:40:00	NA	20	NA	14.8323	3.8768	NA	0.876031	0.657302	1.1682	0.238
RRRM	Floodplain Preservation	39.3941	-76.8138	N	2014-08-20 11:40:00	NA	21	7.74	12.1175	1.3777	0.539	0.896886	0.645952	1.22195	0.601
RRRM	Floodplain Preservation	39.3941	-76.8138	N	2014-09-10 14:50:00	NA	20.2	7.67	13.6922	2.9721	0.4207	0.852802	0.699954	1.22902	NA
RRRM	Floodplain Preservation	39.3941	-76.8138	N	2014-09-24 15:00:00	NA	15.7	7.63	12.094	1.0167	0.4596	0.880708	0.626811	1.25934	0.376
RRRM	Floodplain Preservation	39.3941	-76.8138	N	2014-10-22 15:00:00	NA	13.7	7.35	9.429	8.0322	0.364	0.832747	0.562777	1.14013	NA
RRRM	Floodplain Preservation	39.3941	-76.8138	N	2014-11-10 12:45:00	10.1	9.5	7.4	12.121	2.0074	0.1832	0.870908	0.633622	1.21691	0.253
RRRM	Floodplain Preservation	39.3941	-76.8138	Y	2014-11-25 12:05:00	10.54	9.3	7.37	11.941	2.7186	0.2631	0.852823	0.80797	1.26682	0.166
RRRM	Floodplain Preservation	39.3941	-76.8138	N	2014-11-25 12:05:00	10.54	9.3	7.37	11.961	2.6376	0.2878	0.857258	0.608486	1.19766	NA
RRRM	Floodplain Preservation	39.3941	-76.8138	N	2014-12-10 16:15:00	12.62	5.9	7.71	12.1938	0.8596	3.278	NA	NA	NA	NA
RRSD	Septic Systems	39.4232	-76.8246	N	2013-01-07 14:25:00	11.78	7.4	NA	NA	1.12459	5.9666	NA	NA	NA	NA
RRSD	Septic Systems	39.4232	-76.8246	Y	2013-01-16 11:05:00	10.38	7.5	NA	NA	2.03059	2.8356	NA	NA	NA	NA
RRSD	Septic Systems	39.4232	-76.8246	N	2013-01-16 11:05:00	10.38	7.5	NA	NA	2.03159	2.8756	NA	NA	NA	NA
RRSD	Septic Systems	39.4232	-76.8246	N	2013-01-31 12:45:00	8.66	10.7	NA	NA	1.08859	4.7266	NA	NA	NA	NA
RRSD	Septic Systems	39.4232	-76.8246	N	2013-02-09 11:10:00	8.02	9.5	NA	8.0199	0.28292	6.3988	0.773802	0.941345	1.30134	7.91
RRSD	Septic Systems	39.4232	-76.8246	N	2013-03-03 10:15:00	9.85	9.9	NA	8.95915	0.194845	5.87165	0.854177	0.846904	1.30854	7.19
RRSD	Septic Systems	39.4232	-76.8246	N	2013-03-19 12:25:00	8.32	11.2	6.28	9.5054	0.2808	6.4229	0.764682	0.85616	1.29571	7.78
RRSD	Septic Systems	39.4232	-76.8246	N	2013-05-01 14:25:00	8.43	14	NA	11.7001	0.2886	7.0721	0.763296	0.887186	1.27455	NA
RRSD	Septic Systems	39.4232	-76.8246	N	2013-05-22 15:35:00	7.28	13.9	6.2	9.7125	0.4801	7.0215	0.678582	0.917851	1.28929	7.22
RRSD	Septic Systems	39.4232	-76.8246	N	2013-06-11 14:15:00	7.29	15.1	NA	10.5473	1.048	6.6627	0.824156	0.800346	1.24112	6.74
RRSD	Septic Systems	39.4232	-76.8246	N	2013-07-03 14:05:00	7.35	16.6	NA	13.5038	0.9491	6.349	0.828697	0.83528	1.22541	6.7
RRSD	Septic Systems	39.4232	-76.8246	N	2013-07-10 10:35:00	8.21	15.1	5.95	11.8961	0.5943	7.282	0.702121	0.979786	1.36172	7.41
RRSD	Septic Systems	39.4232	-76.8246	N	2013-07-24 10:25:00	7.11	15.6	6.02	14.5918	0.43084	7.2265	0.742173	0.960412	1.34433	7.42
RRSD	Septic Systems	39.4232	-76.8246	N	2013-08-16 10:15:00	7.73	15.5	5.9	10.0854	0.4468	7.6122	0.526336	1.15426	1.37059	7.13
RRSD	Septic Systems	39.4232	-76.8246	N	2013-08-27 09:00:00	7.51	15.5	6.11	11.1591	0.4646	7.2153	0.769892	0.818117	1.23476	7.47
RRSD	Septic Systems	39.4232	-76.8246	N	2013-09-14 09:45:00	7.06	14.7	NA	9.486	0.3651	7.2673	0.72925	1.00031	1.32436	8.1
RRSD	Septic Systems	39.4232	-76.8246	N	2013-09-28 09:45:00	7.58	15.3	NA	8.415	NA	NA	0.663962	1.05948	1.39447	8.1
RRSD	Septic Systems	39.4232	-76.8246	N	2013-10-14 10:45:00	8.31	15.3	NA	11.161	NA	NA	0.712781	0.97696	1.30236	7.49
RRSD	Septic Systems	39.4232	-76.8246	N	2013-11-07 14:45:00	6.84	14.1	NA	13.061	1.026	8.054	0.69295	0.653506	1.19446	7.08
RRSD	Septic Systems	39.4232	-76.8246	N	2013-11-22 09:10:00	7.29	13	5.78	8.2204	0.1894	6.7539	0.777834	0.629298	1.2254	7.86
RRSD	Septic Systems	39.4232	-76.8246	N	2013-12-13 09:15:00	8.57	10.8	5.76	10.186	NA	NA	0.734433	0.971762	1.33149	7.65
RRSD	Septic Systems	39.4232	-76.8246	N	2014-01-17 09:15:00	5.99	10.4	5.73	11.369	0.7496	6.2185	0.753481	0.915612	1.31831	7.17
RRSD	Septic Systems	39.4232	-76.8246	N	2014-02-01 09:00:00	8.95	10	5.13	8.661	0.45407	6.1261	0.722929	0.982097	1.28088	7.29
RRSD	Septic Systems	39.4232	-76.8246	Y	2014-02-19 09:20:00	8.65	9.8	5.45	10.34	0.49185	6.4448	NA	NA	NA	7.19
RRSD	Septic Systems	39.4232	-76.8246	N	2014-02-19 09:20:00	8.65	9.8	5.45	10.52	0.45255	6.4888	0.772731	0.909516	1.26125	7.09
RRSD	Septic Systems	39.4232	-76.8246	N	2014-03-05 09:10:00	9.83	8.9	5.23	11.31	0.39949	8.714	NA	NA	NA	7.16
RRSD	Septic Systems	39.4232	-76.8246	N	2014-03-27 15:35:00	8.95	10.8	5.97	9.9997	0.59684	7.0786	NA	NA	NA	NA
RRSD	Septic Systems	39.4232	-76.8246	N	2014-04-23 09:15:00	9.01	11.1	NA	11.248	0.4905	6.4333	0.735701	0.827599	1.23665	6.88
RRSD	Septic Systems	39.4232	-76.8246	N	2014-05-08 08:50:00	9.34	12.1	5.26	NA	NA	NA	NA	NA	NA	NA
RRSD	Septic Systems	39.4232	-76.8246	N	2014-05-30 15:15:00	8.1	14	NA	8.7745	0.6084	6.378	0.777134	0.813185	1.28312	6.66
RRSD	Septic Systems	39.4232	-76.8246	N	2014-06-19 08:55:00	8.52	14.6	NA	10.4465	NA	NA	0.811241	0.804356	1.24481	6.89
RRSD	Septic Systems	39.4232	-76.8246	N	2014-07-16 09:30:00	NA	14	NA	10.3823	0.5019	NA	0.808569	0.837082	1.25116	6.43
RRSD	Septic Systems	39.4232	-76.8246	N	2014-08-20 11:05:00	NA	15.4	6.03	13.6775	0.8278	6.7981	0.730726	0.886757	1.31456	6.28
RRSD	Septic Systems	39.4232	-76.8246	N	2014-09-10 14:15:00	NA	15.7	5.96	11.9222	0.4888	6.8253	0.737077	0.974399	1.36727	6.83
RRSD	Septic Systems	39.4232	-76.8246	N	2014-09-24 14:25:00	NA	15.2	6.04	10.224	0.2277	6.8672	0.706177	0.881594	1.4344	7.02
RRSD	Septic Systems	39.4232	-76.8246	N	2014-10-22 14:25:00	NA	14.2	6.62	16.27	4.0662	4.2429	0.777559	0.794052	1.14333	NA
RRSD	Septic Systems	39.4232	-76.8246	N	2014-11-10 12:10:00	7.11	14.4	6.16	12.651	0.5591	6.3914	0.696252	0.950555	1.38401	7.29
RRSD	Septic Systems	39.4232	-76.8246	N	2014-11-25 11:25:00	7.25	13.1	6.33	13.531	0.6526	6.6283	0.662265	0.902648	1.2979	7.04
RRSD	Septic Systems	39.4232	-76.8246	N	2014-12-10 15:40:00	9.69	11.9	6.62	12.2638	0.9046	5.973	NA	NA	NA	NA
RRSM	Septic Systems	39.425	-76.8316	N	2013-01-07 14:30:00	8.1	11.8	NA	NA	0.72659	3.6726	NA	NA	NA	NA
RRSM	Septic Systems	39.425	-76.8316	N	2013-01-16 10:50:00	11.99	5.5	NA	NA	0.76559	2.2816	NA	NA	NA	NA
RRSM	Septic Systems	39.425	-76.8316	N	2013-01-31 12:30:00	10.62	7.5	NA	NA	2.28659	1.1886	NA	NA	NA	NA
RRSM	Septic Systems	39.425	-76.8316	N	2013-01-31 12:30:00	10.62	7.5	NA	NA	3.27559	1.3496	NA	NA	NA	NA
RRSM	Septic Systems	39.425	-76.8316	N	2013-02-09 10:30:00	10.7	4.5	NA	5.5929	0.48602	3.6798	0.845488	0.697921	1.20506	4.53
RRSM	Septic Systems	39.425	-76.8316	N	2013-03-03 10:00:00	12.99	5.2	NA	5.65015	0.438145	3.24665	0.873338	0.688537	1.2393	4.1
RRSM	Septic Systems	39.425	-76.8316	N	2013-03-19 13:30:00	10.03	10.5	6.69	4.5624	0.5931	3.4108	0.838912	0.636053	1.15387	4.19
RRSM	Septic Systems	39.425	-76.8316	N	2013-05-01 14:05:00	9.47	15.1	NA	5.9461	0.9871	3.9551	0.83096	0.669111	1.19749	2.41
RRSM	Septic Systems	39.425	-76.8316	N	2013-05-22 15:00:00	7.89	17.9	6.51	5.9208	0.5939	3.9095	0.729735	0.718081	1.22496	4.09
RRSM	Septic Systems	39.425	-76.8316	N	2013-06-11 14:00:00	7.82	17.7	NA	6.9126	2.3106	2.9307	0.836639	0.625226	1.15344	2.74
RRSM	Septic Systems	39.425	-76.8316	N	2013-07-03 13:40:00	8.49	18.4	NA	8.7758	2.852	3.065	0.826596	0.723015	1.15763	2.97
RRSM	Septic Systems	39.425	-76.8316	N	2013-07-10 11:20:00	8.53	17.2	6.5	6.0501	0.8626	4.105	0.411015	1.15257	1.38758	4.22
RRSM	Septic Systems	39.425	-76.8316	N	2013-07-24 11:20:00	7.23	18.2	6.68	8.4278	0.69134	4.0665	0.815009	0.693432	1.22123	4.08
RRSM	Septic Systems	39.425	-76.8316	N	2013-08-16 11:00:00	9.05	16.5	6.72	6.0224	0.5863	4.1332	0.7092	0.714035	1.27988	4.25
RRSM	Septic Systems	39.425	-76.8316	N	2013-08-27 09:50:00	8.37	17.3	6.75	5.9961	0.6037	3.8733	0.82902	0.662782	1.26326	4.21
RRSM	Septic Systems	39.425	-76.8316	N	2013-09-14 10:30:00	8.8	14.6	NA	6.197	0.5181	3.8343	NA	NA	NA	4.48
RRSM	Septic Systems	39.425	-76.8316	N	2013-09-28 10:30:00	9.35	14.3	NA	5.962	NA	NA	0.756299	0.746725	1.25639	4.2
RRSM	Septic Systems	39.425	-76.8316	N	2013-10-14 10:55:00	10.2	14.3	NA	6.428	NA	NA	0.828779	0.695882	1.22237	NA
RRSM	Septic Systems	39.425	-76.8316	N	2013-11-07 15:30:00	8.71	11.8	NA	7.186	3.222	3.964	0.701932	0.404659	1.25281	3.46
RRSM	Septic Systems	39.425	-76.8316	N	2013-11-22 10:00:00	9.75	10	6.42	6.6844	2.4142	3.7379	0.663347	0.979356	1.25147	4.27
RRSM	Septic Systems	39.425	-76.8316	N	2013-12-13 10:00:00	13.04	3.5	6.44	6.711	NA	NA	0.801336	0.706889	1.20094	4.01
RRSM	Septic Systems	39.425	-76.8316	N	2014-01-17 09:50:00	10.15	5.1	6.35	6.994	0.4294	3.4905	0.792292	0.715984	1.2348	4.19
RRSM	Septic Systems	39.425	-76.8316	N	2014-02-01 10:00:00	12.38	4.7	5.72	5.129	0.47287	3.6891	0.59258	0.914624	1.30533	4.32
RRSM	Septic Systems	39.425	-76.8316	N	2014-02-19 09:45:00	11.09	4.3	6.31	6.1	3.33545	3.1918	0.773035	0.639815	1.0991	2.92
RRSM	Septic Systems	39.425	-76.8316	N	2014-03-05 09:45:00	12.83	3.9	5.88	6.896	0.58369	4.916	NA	NA	NA	4.21
RRSM	Septic Systems	39.425	-76.8316	N	2014-03-27 15:30:00	10.69	9.3	6.45	5.9267	1.07444	4.1116	NA	NA	NA	NA
RRSM	Septic Systems	39.425	-76.8316	N	2014-04-23 09:50:00	10.46	10.4	NA	6.587	1.4336	3.3483	0.833655	0.578609	1.28814	3.72
RRSM	Septic Systems	39.425	-76.8316	Y	2014-04-23 09:50:00	10.46	10.4	NA	6.11	1.3076	3.3493	NA	NA	NA	NA
RRSM	Septic Systems	39.425	-76.8316	N	2014-05-08 09:40:00	10.43	11.9	4.81	NA	NA	NA	0.835081	0.644371	1.19519	3.64
RRSM	Septic Systems	39.425	-76.8316	N	2014-05-30 14:30:00	9.14	15	NA	7.4165	1.0745	3.335	0.845495	0.647231	1.20414	3.61
RRSM	Septic Systems	39.425	-76.8316	N	2014-06-19 09:45:00	8.77	17.1	NA	7.3485	NA	NA	0.8536	0.629146	1.19649	NA
RRSM	Septic Systems	39.425	-76.8316	N	2014-07-16 10:00:00	NA	16	NA	6.4843	1.0128	NA	0.85843	0.648367	1.19121	3.91
RRSM	Septic Systems	39.425	-76.8316	N	2014-08-20 11:15:00	NA	17	6.66	6.1665	0.5939	4.3131	0.770642	0.737915	1.24295	5.06
RRSM	Septic Systems	39.425	-76.8316	N	2014-09-10 14:25:00	NA	17.6	6.7	5.6342	0.6516	4.2773	0.797728	0.718155	1.23372	4.65
RRSM	Septic Systems	39.425	-76.8316	N	2014-09-24 14:35:00	NA	14.9	6.76	4.69	0.4787	4.2572	0.834557	0.655378	1.24706	3.48
RRSM	Septic Systems	39.425	-76.8316	N	2014-10-22 08:10:00	NA	13	6.94	10.23	8.4462	1.6299	0.802331	0.511122	1.17214	NA
RRSM	Septic Systems	39.425	-76.8316	N	2014-11-10 12:20:00	9.27	10.9	6.58	6.825	1.0134	3.8324	0.749436	0.625708	1.19269	4.26
RRSM	Septic Systems	39.425	-76.8316	N	2014-11-25 11:20:00	9.71	10.2	7.02	7.395	0.8736	3.7313	0.812351	0.69242	1.15794	3.48
RRSM	Septic Systems	39.425	-76.8316	N	2014-12-10 15:55:00	10.75	7.7	6.35	6.4388	0.6681	3.419	NA	NA	NA	NA

## Sheet: Seasonal Synoptic
Date	watershed	Site ID	Type	Latitude	Longitude	Drainage area_km2	Distance to WS outlet_m	DO_mgL	O2eq.uM	Q_m3s	Stream Temperature	pH	CO2uM	CH4uM	N2OuM	N2Osat	CO2sat	CH4sat	DIC.mgL	DOC.mgL	TDN.mgL
2014-12-03	DR	D1	Main Stem	39.3112	-76.7167	14.1828	0	NA	381.674	0.311	6.5	NA	76.52	0.19	0.02	1.36	3.68	51.16	34.6505	4.22349	0.7037
2014-12-03	DR	D2	Main Stem	39.3133	-76.7254	12.7632	630	NA	378.917	0.231	6.8	NA	90.78	0.14	0.02	1.4	4.42	38.67	40.3005	4.51549	0.7486
2014-12-03	DR	D4	Main Stem	39.3155	-76.7278	12.6495	1300	NA	385.543	0.081	6.1	NA	57.29	0.05	0.02	1.26	2.72	14.6	42.7705	4.01149	0.6271
2014-12-03	DR	D5	Tributary	39.3131	-76.7317	7.1538	1588	NA	370.315	0.009	7.7	NA	88.61	0.17	0.02	1.63	4.46	48.51	45.5705	5.44249	1.1788
2014-12-03	DR	D6	tributary	39.3088	-76.7368	4.9757	2030	NA	368.966	0.045	7.8	NA	85.02	0.19	0.02	1.64	4.3	54.67	47.9605	5.70049	2.1868
2014-12-03	DR	D7	Main Stem	39.3183	-76.736	4.9468	2030	NA	375.846	0.054	7.1	NA	62.39	0.06	0.02	1.35	3.07	17.02	46.7105	4.06749	0.6559
2014-12-03	DR	D8	Main Stem	39.318	-76.7397	2.0733	2350	NA	375.846	0.035	7.1	NA	84.22	0.25	0.03	1.89	4.15	68.68	49.1905	4.98649	0.6736
2014-12-03	DR	D10	Tributary	39.327	-76.7451	1.9165	3300	NA	358.531	0.014	8.8	NA	74.42	0.06	0.03	2.12	3.92	16.27	54.6405	2.81549	1.0528
2014-12-03	DR	D10_dup	Tributary	39.327	-76.7451	1.9165	3300	NA	358.531	0.014	8.8	NA	79.88	0.06	0.03	2.25	4.2	17.61	54.1805	3.11649	1.0088
2014-12-03	DR	D11	Main Stem	39.3189	-76.7507	1.8041	3285	NA	363.185	0.021	8.3	NA	39.21	0.15	0.02	1.46	2.03	44.15	45.6905	4.16549	0.8588
2014-12-03	DR	D12	Main Stem	39.3192	-76.7524	1.1121	3330	NA	361.426	0.007	8.5	NA	33.6	0.09	0.02	1.56	1.75	26.86	45.5305	4.28349	1.0148
2014-12-03	DR	D13	Main Stem	39.3191	-76.7513	0.3429	3330	NA	367.646	0.013	7.8	NA	69.1	0.04	0.02	1.6	3.51	10.68	43.8505	3.69249	0.4783
2014-12-03	DR	D14	Tributary	39.3236	-76.7544	0.2634	3960	NA	364.633	NA	8	NA	307.7	0.13	0.13	9.7	15.78	35.9	50.2505	3.53549	0.9478
2014-12-03	DR	D15	Tributary	39.316	-76.7586	0.4664	4120	NA	365.868	NA	7.9	NA	124.11	0.33	0.03	2.19	6.33	93.26	65.0605	10.2655	0.9368
2014-12-03	DR	D16	Tributary	39.3018	-76.748	0.18	4875	NA	346.28	0.0004	10.2	NA	384.72	0.12	0.11	9.53	21.3	34.95	71.4905	3.32949	2.1608
2014-12-03	DR	D17	Tributary	39.2959	-76.7441	0.9902	4188	NA	360.609	NA	8.5	NA	50.51	0.12	0.02	1.94	2.63	35.75	44.8705	3.02949	1.3188
2014-12-03	DR	D18	Tributary	39.2901	-76.7466	0.3604	4903	NA	342.688	NA	10.6	NA	148.1	0.03	0.06	5.29	8.32	9.94	74.8505	2.80949	2.5868
2014-12-10	RR	R1	Main Stem	39.4048	-76.7796	17.4566	0	NA	389.634	NA	5.3	NA	65.37	0.32	0.02	1.34	3.04	84.9	13.3738	5.4216	0.743
2014-12-10	RR	R2	Main Stem	39.4032	-76.7844	17.0079	445	NA	390.272	0.389201	5.2	NA	53.66	0.19	0.02	1.51	2.49	50.91	14.6838	5.0956	0.7899
2014-12-10	RR	R3	Main Stem	39.4005	-76.7956	15.8053	1480	NA	386.29	0.353136	5.6	NA	66.01	0.09	0.02	1.67	3.11	22.99	15.5438	4.6826	0.8272
2014-12-10	RR	R4	Main Stem	39.4006	-76.7988	15.3532	1740	NA	385.153	0.306167	5.6	NA	68.5	0.09	0.02	1.63	3.23	23.7	15.3438	4.8136	0.877
2014-12-10	RR	R5	Tributary	39.4006	-76.7994	2.5236	1795	NA	393.164	0.0265735	4.8	NA	68.63	0.11	0.02	1.19	3.14	27.89	11.0638	3.5036	0.3643
2014-12-10	RR	R6	Main Stem	39.406	-76.8024	12.8079	3380	NA	378.513	0.310475	6.2	NA	60.31	0.08	0.02	1.77	2.92	22.63	15.3838	4.7856	0.927
2014-12-10	RR	R7	Main Stem	39.4116	-76.8033	11.706	2490	NA	375.663	0.299283	6.5	NA	74.13	0.12	0.03	2.33	3.63	32	16.7638	4.6016	0.999
2014-12-10	RR	R8	Tributary	39.4142	-76.8032	0.1636	3655	NA	379.471	NA	6.1	NA	174.38	0.36	0.04	2.9	8.41	98.71	5.6348	1.7476	0.1783
2014-12-10	RR	R10	Tributary	39.4125	-76.8048	0.1991	3545	NA	373.784	0.0147665	6.7	NA	86.49	0.17	0.02	1.72	4.26	46.36	9.1738	1.1726	0.6844
2014-12-10	RR	R10_dup	Tributary	39.4125	-76.8048	0.1991	3717	NA	373.784	0.0147665	6.7	NA	70.13	0.18	0.02	1.82	3.46	50.32	9.2598	1.3156	0.7058
2014-12-10	RR	R11	Tributary	39.4108	-76.8124	2.5846	4095	NA	375.141	0.031	6.7	NA	100.75	0.09	0.04	2.71	4.95	25.23	15.4638	7.9216	0.6681
2014-12-10	RR	R12	Main Stem	39.4112	-76.8119	10.3789	4145	NA	371.417	0.19612	7.1	NA	96.28	0.15	0.03	2.09	4.8	42.2	18.6138	5.7496	0.991
2014-12-10	RR	R13	Main Stem	39.4129	-76.8145	7.491	4395	NA	371.417	0.164765	7.1	NA	78.41	0.19	0.02	1.61	3.91	54.66	19.0638	3.5336	1.079
2014-12-10	RR	R14	Tributary	39.4128	-76.815	3.0008	4415	NA	371.417	0.056	7.1	NA	85.32	0.22	0.03	1.9	4.25	61.57	13.8138	6.2206	0.944
2014-12-10	RR	R15	Main Stem	39.4244	-76.8151	0.3496	5795	NA	NA	NA	NA	NA	NA	NA	NA	NA	NA	NA	27.9338	1.1226	0.997
2014-12-10	RR	R16	Tributary	39.4233	-76.8248	0.2077	5845	NA	330.396	NA	11.9	NA	1019.31	0.07	0.43	38.61	60.3	22.36	12.2638	0.9046	5.973
2014-12-10	RR	R17	Tributary	39.425	-76.8316	0.68	6557	NA	364.922	NA	7.7	NA	305.67	0.08	0.07	5.69	15.61	22.02	6.4388	0.6681	3.419
2014-12-10	RR	R18	Tributary	39.394	-76.8138	0.632	3245	NA	381.708	NA	5.9	NA	106.6	0.12	0.02	1.17	5.1	34.02	12.4538	2.6756	0.3151
2014-04-04	DR	D1	Main Stem	39.3112	-76.7167	14.1828	0	10.38	349.34	0.13875	9.9	7.27	128.854	0.0739494	0.033504	2.74657	7.04773	22.249	35.6285	4.78339	1.2703
2014-04-04	DR	D1	Main Stem	39.3112	-76.7167	14.1828	0	10.38	349.34	0.13875	9.9	7.27	145.938	0.0829388	0.0328527	2.69318	7.98215	24.9536	35.6885	4.85239	1.2753
2014-04-04	DR	D2	Main Stem	39.3133	-76.7254	12.7632	630	10.3	351.41	0.10001	9.6	7.44	146.08	0.120063	0.043446	3.52567	7.91575	35.8844	36.2885	4.79039	1.4953
2014-04-04	DR	D3	Tributary	39.3133	-76.7254	1.55	630	11.12	343.24	0.00978	10.6	7.63	134.641	0.116434	0.0328783	2.77038	7.55521	35.7135	33.9885	4.24939	1.2703
2014-04-04	DR	D4	Main Stem	39.3155	-76.7278	5.33	1300	11.05	353.93	0.04387	9.3	7.83	114.126	0.0660155	0.0301962	2.42271	6.11921	19.5761	38.5185	4.82939	1.5223
2014-04-04	DR	D5	Tributary	39.3131	-76.7317	6.26777	1588	13.51	352.71	0.06796	9.4	7.68	124.776	0.108206	0.0482387	3.88917	6.72104	32.2061	34.7985	4.77639	1.6403
2014-04-04	DR	D6	Tributary	39.3088	-76.7368	4.9757	2030	12.41	355.25	0.02538	9.1	7.81	78.7285	0.170326	0.0270326	2.15475	4.196	50.2963	34.0185	5.31039	1.7083
2014-04-04	DR	D7	Main Stem	39.3183	-76.736	4.9468	2030	13.47	353.22	0.05947	9.3	8	72.877	0.0949913	0.0352486	2.83374	3.91535	28.225	35.7185	5.09639	1.3403
2014-04-04	DR	D8	Tributary	39.3183	-76.736	2.03	2350	13.08	350.06	0.01334	9.7	8.07	64.8337	0.0320551	0.0388667	3.17066	3.53074	9.61982	37.5585	5.09239	1.5323
2014-04-04	DR	D9	Main Stem	39.318	-76.7397	2.0733	2510	13.9	356.81	0.01926	8.9	7.85	100.371	0.230714	0.0428033	3.38724	5.31379	67.7964	31.3385	5.32539	1.2393
2014-04-04	DR	D10	Tributary	39.327	-76.7451	1.9165	3300	13.37	345.8	0.00878	10.1	7.95	92.4434	0.0360725	0.0560837	4.65778	5.11968	10.9694	43.2085	3.97539	1.5723
2014-04-04	DR	D11	Main Stem	39.3189	-76.7507	1.8041	3285	12.98	359.07	0.01416	8.5	8.14	53.8983	0.0732909	0.0393384	3.07599	2.82255	21.3803	24.3085	2.62639	1.4873
2014-04-04	DR	D12	Main Stem	39.3192	-76.7524	1.1121	3330	12.47	362.58	0.00885	8.1	7.91	44.1632	0.0598534	0.0432086	3.327	2.27987	17.2742	20.8085	2.37639	1.6093
2014-04-04	DR	D13	Main Stem	39.3191	-76.7513	0.3429	3330	14.19	345.61	0.003	10.1	8.25	26.86	0.0690354	0.0398484	3.3112	1.48835	21.0045	43.4385	3.54239	1.9313
2014-04-04	DR	D14	Tributary	39.3236	-76.7544	0.2634	3960	7.04	345.69	0.00247	10	10	418.129	0.0347256	0.193598	16.061	23.1379	10.5608	25.5885	2.63339	1.6123
2014-04-04	DR	D15	Tributary	39.316	-76.7586	0.4664	4120	10.9	363.03	0.0101	8	7.49	113.259	0.117403	0.0570754	4.38307	5.83291	33.8332	36.1085	3.40139	1.0693
2014-04-04	DR	D16	Tributary	39.3018	-76.748	0.18	4875	NA	341.61	0.00132	NA	NA	338.236	0.348644	0.109699	9.27441	19.0485	107.423	34.4085	2.28639	2.7373
2014-04-04	DR	D17	Tributary	39.2959	-76.7441	0.9902	4188	14.44	344.09	0.01954	10.1	8.61	13.0564	0.0784202	0.0358347	2.9909	0.726688	23.9658	21.4585	2.67839	1.9363
2014-04-04	DR	D18	Tributary	39.2901	-76.7466	0.3604	4903	NA	344.9	0.00874	NA	NA	147.448	0.067926	0.0747139	6.21247	8.17793	20.7049	37.2985	1.88939	2.6173
2014-03-27	RR	R1	Main Stem	39.4048	-76.7796	17.4566	0	14.71	433.45	0.22122	1.8	6.94	NA	NA	NA	NA	NA	NA	15.99	1.497	1.435
2014-03-27	RR	R1_dup	Main Stem	39.4048	-76.7796	17.4566	0	14.71	433.45	0.22122	1.8	6.94	64.4947	0.09103	0.02724	1.60219	2.58867	21.6148	15.99	1.497	1.435
2014-03-27	RR	R2	Main Stem	39.4032	-76.7844	17.0079	445	14.37	433.45	0.25516	1.8	7.17	62.3284	0.07752	0.02941	1.7299	2.50172	18.4061	16.47	2.233	1.549
2014-03-27	RR	R3	Main Stem	39.4005	-76.7956	15.8053	1480	14.46	431.92	0.27029	1.9	7.34	50.8741	0.04689	0.03311	1.95761	2.0516	11.1762	16.48	1.526	1.61
2014-03-27	RR	R4	Main Stem	39.4006	-76.7988	15.3532	1740	14.6	430.91	0.2043	2	7.38	60.3565	0.04462	0.03193	1.89466	2.44255	10.6621	16.33	1.395	1.64
2014-03-27	RR	R5	Tributary	39.4006	-76.7994	2.5236	1795	14.96	440.51	0.02568	1.2	7.56	41.6844	0.03297	0.026	1.49206	1.63478	7.69119	11.51	2.164	1.205
2014-03-27	RR	R6	Main Stem	39.406	-76.8024	12.8079	3380	14.83	417.86	0.26003	3	7.56	55.2032	0.03742	0.03614	2.24446	2.33089	9.24687	15.67	1.405	1.719
2014-03-27	RR	R7	Main Stem	39.4116	-76.8033	11.706	2490	14.27	411.23	0.18175	3.6	7.53	91.7659	0.06846	0.04266	2.71521	3.96484	17.2195	16.22	1.435	1.813
2014-03-27	RR	R8	Tributary	39.4142	-76.8032	0.1636	3655	11.94	395.41	4.08e-06	5.1	7.05	158.82	0.0721	0.05946	4.022	7.26204	18.9337	4.498	0.988	0.56
2014-03-27	RR	R9	Tributary	39.4125	-76.8048	0.1991	3545	13.92	404.77	0.01167	4.2	7.43	79.8078	0.14411	0.04164	2.71595	3.52773	36.8815	10.18	0.95	1.224
2014-03-27	RR	R10	Main Stem	39.4125	-76.8048	11.0425	3717	13.96	405.84	0.18539	4.1	7.56	90.9598	0.07309	0.04104	2.666	4.00547	18.651	17.31	1.718	1.874
2014-03-27	RR	R10_dup	Main Stem	39.4125	-76.8048	11.0425	3717	13.96	405.84	0.18539	4.1	7.56	108.113	0.07127	0.04032	2.61949	4.76082	18.187	17.58	1.389	1.884
2014-03-27	RR	R11	Main Stem	39.4112	-76.8119	10.3789	4095	12.79	383.65	0.14029	6.3	7.41	88.1682	0.09044	0.03947	2.79919	4.21325	24.5553	17.63	1.439	2.003
2014-03-27	RR	R12	Tributary	39.4108	-76.8124	2.5846	4145	13.72	388.54	0.03742	5.8	7.48	134.332	0.06837	0.03799	2.64157	6.30191	18.3053	19.16	1.793	0.988
2014-03-27	RR	R13	Main Stem	39.4129	-76.8145	7.491	4395	12.71	374.72	0.08837	7.2	7.55	66.3991	0.09364	0.03042	2.23792	3.28257	26.0921	18.3	1.695	2.437
2014-03-27	RR	R14	Tributary	39.4128	-76.815	3.0008	4415	12.46	381.32	0.04105	6.5	7.62	91.2928	0.16326	0.03301	2.36211	4.39938	44.6212	13.78	1.786	1.824
2014-03-27	RR	R15	Main Stem	39.4244	-76.8151	0.3496	5795	12.38	365.39	0.05802	8.1	7.41	128.054	0.06558	0.05672	4.33375	6.5597	18.7812	21.37	2.612	1.716
2014-03-27	RR	R16	Tributary	39.4233	-76.8248	0.2077	5845	8.95	341.96	0.00266	10.8	5.97	917.626	0.02477	0.34857	29.5633	51.8013	7.62882	10	0.597	7.079
2014-03-27	RR	R17	Tributary	39.425	-76.8316	0.68	6557	10.69	354.21	0.00831	9.3	6.45	259.955	0.04938	0.07085	5.68005	13.9271	14.6311	5.927	1.074	4.112
2014-03-27	RR	R18	Tributary	39.394	-76.8138	0.632	3245	11.48	372.95	0.00887	7.3	7.08	74.0026	0.05392	0.0338	2.50153	3.68006	15.0985	12.21	2.4	1.371
